# Supplementary material for: Direct enantioseparation of axially chiral 1,1′-biaryl-2,2′-diols using amidine-based resolving agents
Source: Royal Society of Chemistry journal article supplement (doi:10.1039/d1ra03546k), 2021-01-01
Supplement: d1ra03546k1.pdf [file d1ra03546k1.pdf]

# Direct enantioseparation of axially chiral 1,1'-biaryl-2,2'-diols using amidine-based resolving agents

Koichi Kodama,<sup>\*a</sup> Fusato Takase<sup>a</sup> and Takuji Hirose<sup>a</sup>

<sup>a</sup> *Department of Applied Chemistry, Graduate School of Science and Engineering, Saitama University*

---

## Table of Contents

---

|                                                                         |         |
|-------------------------------------------------------------------------|---------|
| Figures S1-S4, Table S1                                                 | S2-S6   |
| Experimental details                                                    | S7-S14  |
| References                                                              | S15     |
| Copies of <sup>1</sup> H NMR, <sup>13</sup> C NMR charts and IR spectra | S16-S53 |
| Copies of HPLC chromatograms                                            | S54-S60 |

---

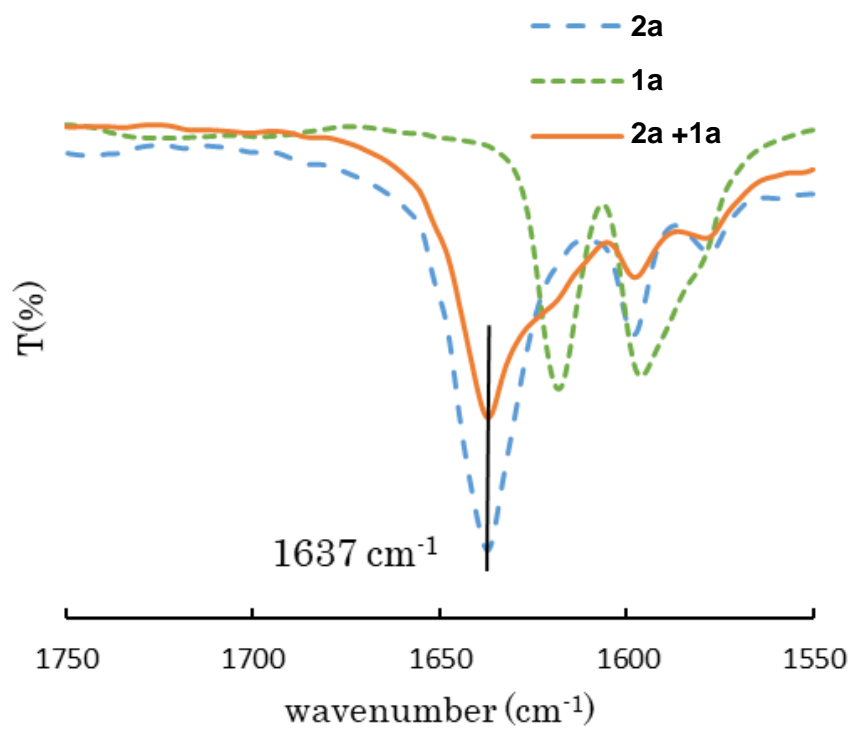

Figure S1. IR spectra of the chiral amidine (**2a**), phenol (**1a**) and their equimolar mixture.

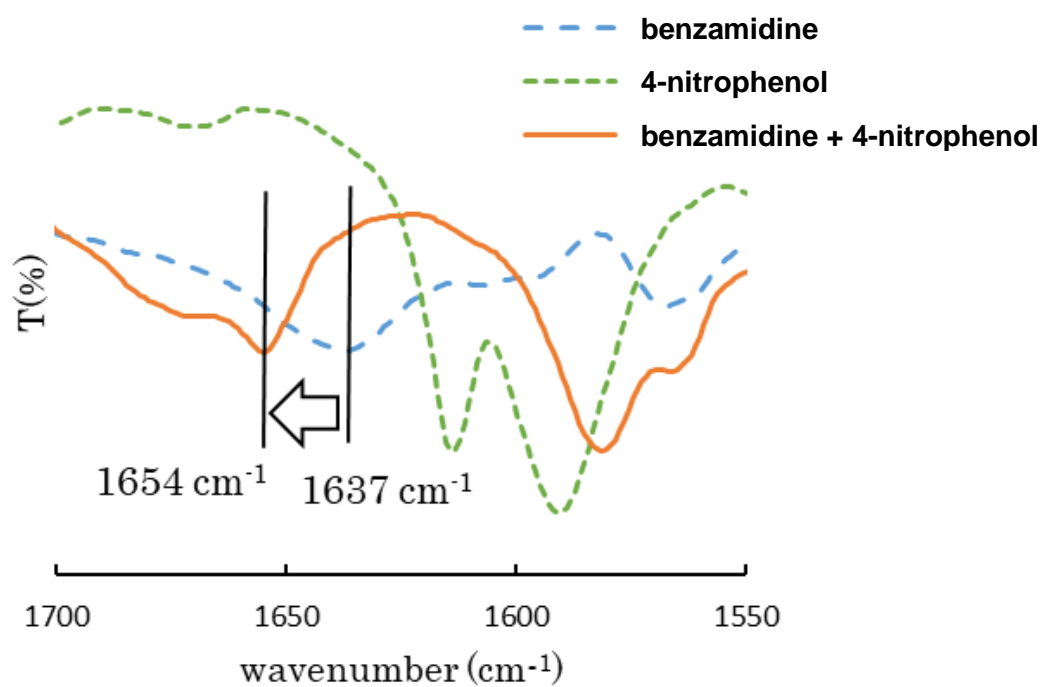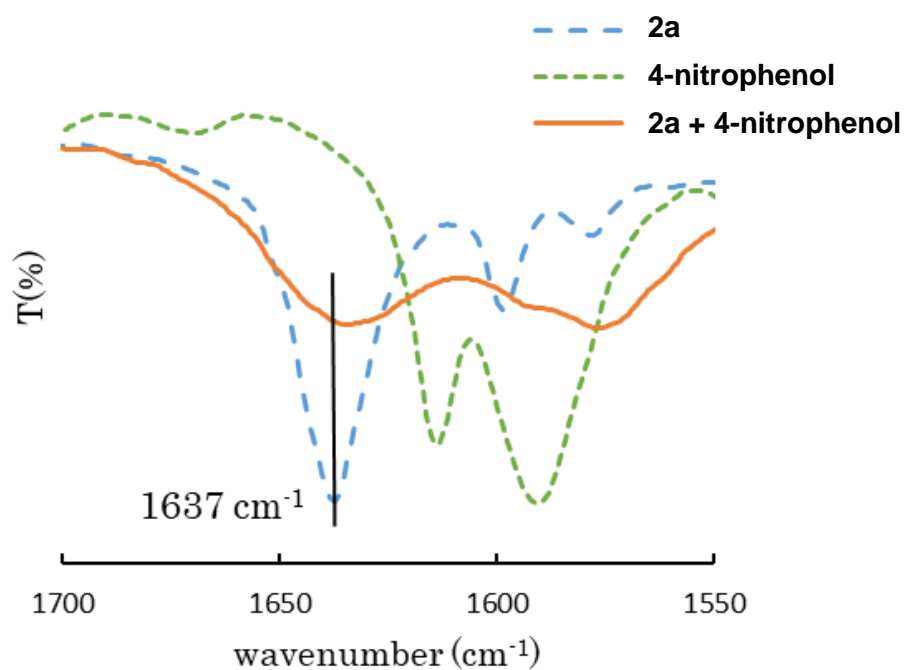

Figure S2. IR spectra of a) benzamidine, 4-nitrophenol and their equimolar mixture and b) chiral amidine (**2a**), 4-nitrophenol and their equimolar mixture.

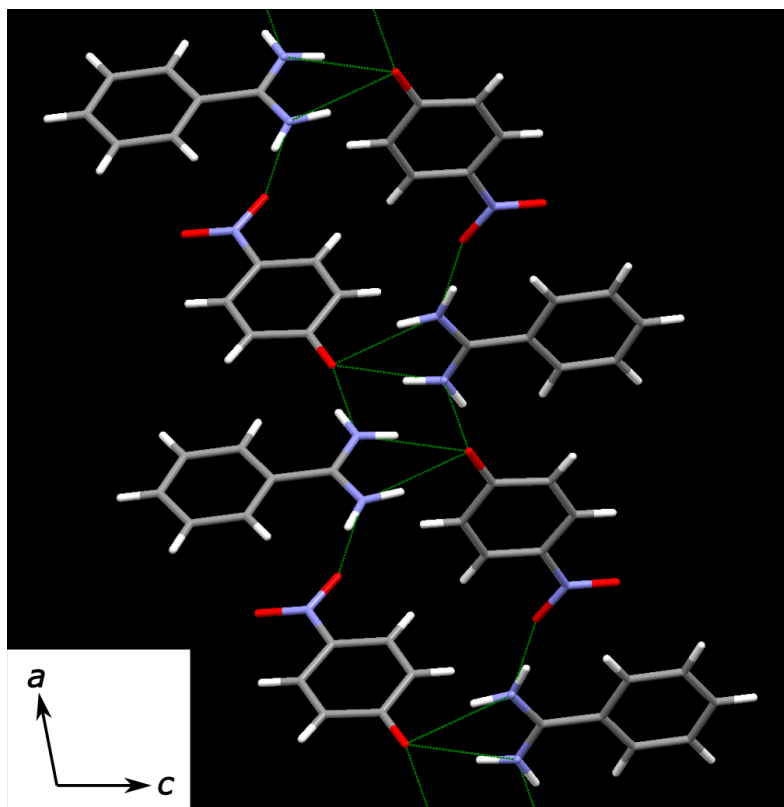

Figure S3. Crystal structure of the salt of benzamidine and 4-nitrophenol viewed from the *b* axis. Oxygen and nitrogen atoms are represented by red and blue. The dotted lines show hydrogen bonds.

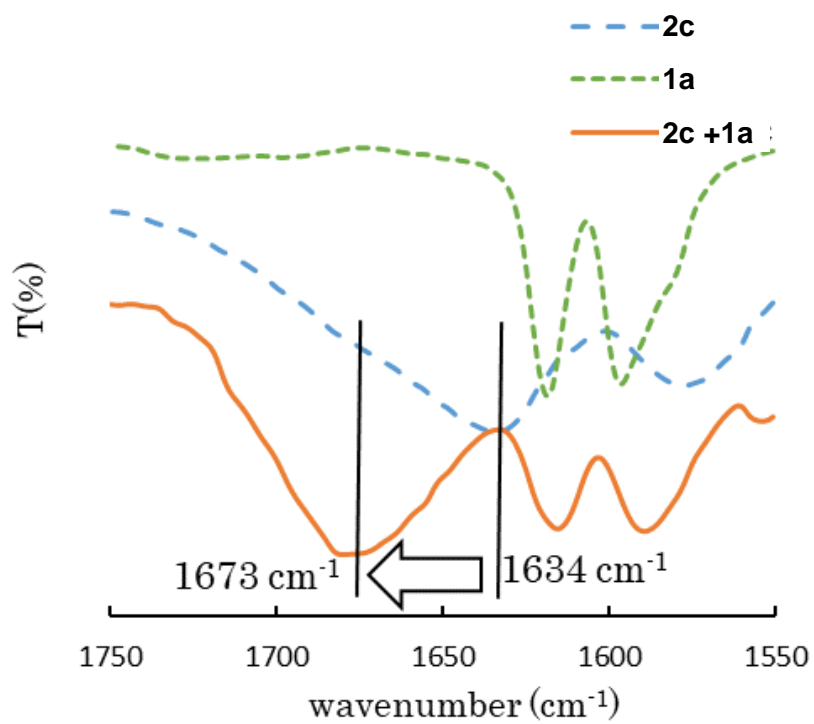

Figure S4. IR spectra of the chiral amidine (**2c**), 1,1'-binaphthyl-2,2'-diol (**1a**) and their equimolar mixture.

Table S1. Summary of crystallographic data reported in this study.

|                                                                            | <b>2a</b> ▪ <b>2(S)-1a</b>                                    | <b>benzamidine</b><br>▪ <b>4-nitrophenol</b>                  | <b>2c</b> ▪ <b>(R)-1a</b>                                     |
|----------------------------------------------------------------------------|---------------------------------------------------------------|---------------------------------------------------------------|---------------------------------------------------------------|
| empirical formula                                                          | C <sub>63</sub> H <sub>52</sub> N <sub>2</sub> O <sub>4</sub> | C <sub>13</sub> H <sub>13</sub> N <sub>3</sub> O <sub>3</sub> | C <sub>40</sub> H <sub>44</sub> N <sub>2</sub> O <sub>2</sub> |
| formula weight                                                             | 901.06                                                        | 259.26                                                        | 584.77                                                        |
| temperature (K)                                                            | 150                                                           | 150                                                           | 150                                                           |
| crystal size (mm)                                                          | 0.13 × 0.12 × 0.04                                            | 0.23 × 0.07 × 0.03                                            | 0.21 × 0.16 × 0.08                                            |
| crystal system                                                             | orthorhombic                                                  | monoclinic                                                    | orthorhombic                                                  |
| space group                                                                | <i>P</i> 2 <sub>1</sub> 2 <sub>1</sub> 2 <sub>1</sub>         | <i>P</i> 2 <sub>1</sub>                                       | <i>P</i> 2 <sub>1</sub> 2 <sub>1</sub> 2 <sub>1</sub>         |
| <i>a</i> (Å)                                                               | 10.0606(15)                                                   | 9.4244(13)                                                    | 10.6751(15)                                                   |
| <i>b</i> (Å)                                                               | 20.736(3)                                                     | 5.0509(7)                                                     | 12.6375(17)                                                   |
| <i>c</i> (Å)                                                               | 22.810(3)                                                     | 13.2982(18)                                                   | 23.647(3)                                                     |
| $\alpha$ (°)                                                               | 90                                                            | 90                                                            | 90                                                            |
| $\beta$ (°)                                                                | 90                                                            | 100.928(2)                                                    | 90                                                            |
| $\gamma$ (°)                                                               | 90                                                            | 90                                                            | 90                                                            |
| <i>V</i> (Å <sup>3</sup> )                                                 | 4758.6(12)                                                    | 621.54(15)                                                    | 3190.1(8)                                                     |
| <i>Z</i>                                                                   | 4                                                             | 2                                                             | 4                                                             |
| <i>D<sub>c</sub></i> (g/cm <sup>3</sup> )                                  | 1.258                                                         | 1.385                                                         | 1.218                                                         |
| $\mu$ (MoK $\alpha$ ) (mm <sup>-1</sup> )                                  | 0.078                                                         | 0.101                                                         | 0.074                                                         |
| $\theta_{\min/\max}$ (°)                                                   | 1.327/24.997                                                  | 1.560/24.987                                                  | 1.722/27.478                                                  |
| <i>R</i> 1 [ <i>F</i> <sub>o</sub> > 2 $\sigma$ ( <i>F</i> <sub>o</sub> )] | 0.0419                                                        | 0.0518                                                        | 0.0416                                                        |
| <i>wR</i> 2 (all <i>F</i> <sub>o</sub> <sup>2</sup> )                      | 0.0754                                                        | 0.1366                                                        | 0.0901                                                        |
| GOF                                                                        | 0.794                                                         | 1.037                                                         | 0.950                                                         |
| measured reflns                                                            | 22966                                                         | 2944                                                          | 18184                                                         |
| independent reflns                                                         | 8364                                                          | 1955                                                          | 7201                                                          |
| observed reflns                                                            | 5316                                                          | 1891                                                          | 5929                                                          |
| reflns used                                                                | 8364                                                          | 1955                                                          | 7201                                                          |
| parameters                                                                 | 644                                                           | 188                                                           | 421                                                           |
| CCDC number                                                                | 2057487                                                       | 2057488                                                       | 2057489                                                       |

## Experimental details

### General and Materials

All the  $^1\text{H}$  and  $^{13}\text{C}$  NMR spectra were measured using 300, 400, or 500 MHz spectrometers. IR spectra were reported in reciprocal centimeters. Melting points are uncorrected. Optical rotation values were measured with a polarimeter. All commercially available reagents and solvents were purchased and used as received unless noted. Dry THF was freshly distilled from sodium under a nitrogen atmosphere. Dry  $\text{CH}_2\text{Cl}_2$  and dry  $\text{CCl}_4$  were distilled after drying over  $\text{CaCl}_2$  and stored with Molecular Sieves 4A under a nitrogen atmosphere. Dry triethylamine was distilled after drying over KOH and stored with KOH under a nitrogen atmosphere. Dry toluene was distilled from sodium under a nitrogen atmosphere and stored with sodium under a nitrogen atmosphere. Dry EtOH was distilled from sodium under a nitrogen atmosphere and stored with Molecular Sieves 4A under a nitrogen atmosphere. The enantiomeric excess of the compounds was determined by chiral HPLC analysis (Daicel Chiralcel OD-3 column  $4.6 \times 250$  mm or Chiralpak AS-3 column  $2.1 \times 250$  mm) with UV detection at 254 nm.

### Synthesis and characterization

**(S)-N-(1-phenylethyl)benzamide (4).**<sup>1</sup> To a vigorously stirred mixture of (*S*)-1-phenylethylamine (**3**) (2.81 g, 23.2 mmol) and NaOH (1.29 g, 32.2 mmol) in  $\text{H}_2\text{O}$  (25 mL) was added dropwise benzoylchloride (3.62 g, 25.8 mmol) over 10 min at 0 °C. After the suspension was stirred for 2 h at room temperature, the white precipitate was filtered, washed several times with  $\text{H}_2\text{O}$  and then dried in vacuo. The desired product **4** (4.24 g, 18.8 mmol, 81%) was obtained as a white solid. Mp: 118.5-120.3 °C.  $[\alpha]_{\text{D}}^{17} = +7.2^\circ$  (c 0.251, MeOH).  $^1\text{H}$  NMR (300 MHz,  $\text{CDCl}_3$ ):  $\delta$  (ppm) 7.84-7.70 (m, 2H), 7.58-7.22 (m, 8H), 6.42-6.18 (br, 1H), 5.44-5.26 (m, 1H), 1.62 (d,  $J = 6.9$  Hz, 3H). IR (KBr):  $\nu$  ( $\text{cm}^{-1}$ ) 3451, 3331, 1634, 1523, 1490, 1319, 758, 700.

**(S,S)-N,N'-bis(1-phenylethyl)benzamidine (2a).**<sup>1</sup> A solution of **4** (0.903 g, 4.01 mmol) and 2,6-lutidine (0.647 g, 6.04 mmol) in dry  $\text{CH}_2\text{Cl}_2$  (10 mL) was cooled to 0 °C. Oxalyl chloride (0.543 g, 4.28 mmol) diluted with dry  $\text{CH}_2\text{Cl}_2$  (5 mL) was slowly added to the solution over 30 min. Stirring was continued at 0 °C for 30 min, and the solution was allowed to warm to room temperature and stirred for 30 min. **3** (0.490 g, 4.04 mmol) diluted with dry  $\text{CH}_2\text{Cl}_2$  (5 mL) was slowly added to the solution over 30 min at room temperature. The reaction mixture was refluxed for 24 h, and then concentrated under reduced pressure. The residue was dissolved in AcOEt (20 mL) and extracted with 1 N HCl aq. (10 mL  $\times$  15). The aqueous phase was basified with 6 N NaOH aq. and extracted with  $\text{CHCl}_3$  (5 mL  $\times$  5). The organic phase was dried over anhydrous  $\text{Na}_2\text{SO}_4$ , filtered and concentrated under reduced pressure. The residue was suspended in hexane, and the resulting solid

was collected by filtration. The crude product (0.530 g) was recrystallized from EtOH (0.8 mL) and the desired product **2a** (0.441 g, 1.34 mmol, 33%) was obtained as colorless crystals. Mp: 124.3-125.0 °C.  $[\alpha]_{\text{D}}^{24} = -48.5^{\circ}$  (c 1.00, CHCl<sub>3</sub>). <sup>1</sup>H NMR (300 MHz, DMSO-*d*<sub>6</sub>): δ (ppm) 7.52-6.72 (m, 15H), 6.70-6.56 (m, 1H), 5.26-5.02 (m, 1H), 4.12-3.96 (m, 1H), 1.49 (d, *J* = 7.2 Hz, 3H), 1.17 (d, *J* = 6.3 Hz, 3H). IR (KBr): ν (cm<sup>-1</sup>) 3060, 2955, 2877, 1637, 1599, 1494, 1484, 1451, 1361, 1349, 1309, 1268, 1142, 1090, 766, 699.

**(S)-2-(6-methoxy-2-naphthyl)propionamide (6).**<sup>2</sup> Oxalyl chloride (3.0 mL) and DMF (3 drops) were added to (*S*)-2-(6-methoxy-2-naphthyl)propanoic acid (**5**) (2.32 g, 10.1 mmol) under a nitrogen atmosphere at 0 °C, and the resulting solution was refluxed for 2 h. After the excess of oxalyl chloride was distilled off, dry toluene (20 mL) and 28% NH<sub>3</sub> aq. (4 mL) were added at 0 °C. After the resulting suspension was stirred at room temperature for 1 h, the white precipitate formed was filtered, washed several times with H<sub>2</sub>O and then dried in vacuo. The desired product **6** (2.21 g, 9.63 mmol, 96%, >99% ee) was obtained as a white solid, which was used for next step without further purification. Mp: 177.0-179.0 °C.  $[\alpha]_{\text{D}}^{22} = +33.3^{\circ}$  (c 0.195, MeOH). <sup>1</sup>H NMR (400 MHz, CDCl<sub>3</sub>): δ (ppm) 7.80-7.66 (m, 3H), 7.44-7.34 (m, 1H), 7.20-7.08 (m, 2H), 3.92 (s, 3H), 3.74 (q, *J* = 7.2 Hz, 1H), 1.61 (d, *J* = 7.2 Hz, 3H). IR (KBr): ν (cm<sup>-1</sup>) 3348, 3195, 2983, 2898, 1660, 1606, 1505, 1486, 1461, 1403, 1309, 1267, 1228, 1217, 1173, 1114, 1027, 927, 894, 854, 814. HPLC analysis (Daicel Chiralcel OD-3, hexane/2-propanol=80:20, 1.0 mL/min, 254 nm UV detector; *t*<sub>r</sub>(*S*) = 10.3 min, *t*<sub>r</sub>(*R*) = 16.4 min).

**(S)-2-(6-methoxy-2-naphthyl)propionitrile (7).**<sup>3</sup> To a stirred solution of **6** (0.300 g, 1.31 mmol) in dry CH<sub>2</sub>Cl<sub>2</sub> (15 mL) were added PPh<sub>3</sub> (0.420 g, 1.60 mmol), dry triethylamine (0.161 g, 1.59 mmol) and dry CCl<sub>4</sub> (0.246 g, 1.60 mmol) under a nitrogen atmosphere. The solution was refluxed for 20 h. After the reaction was quenched with H<sub>2</sub>O, the organic layer was separated, washed with 1 N HCl aq., dried over anhydrous Na<sub>2</sub>SO<sub>4</sub>, filtered and concentrated under reduced pressure. The crude product (0.875 g) was purified by silica gel column chromatography (eluent: CHCl<sub>3</sub>). The desired product **7** (0.244 g, 1.15 mmol, 88%, >99% ee) was obtained as a pale yellow solid. Mp: 98.7-100.0 °C.  $[\alpha]_{\text{D}}^{17} = -28.9^{\circ}$  (c 1.00, CHCl<sub>3</sub>). <sup>1</sup>H NMR (300 MHz, CDCl<sub>3</sub>): δ (ppm) 7.84-7.68 (m, 3H), 7.46-7.34 (m, 1H), 7.22-7.08 (m, 2H), 4.04 (q, *J* = 7.2 Hz, 1H), 3.93 (s, 3H), 1.72 (d, *J* = 7.2 Hz, 3H). IR (KBr): ν (cm<sup>-1</sup>) 3065, 3020, 2992, 2963, 2942, 2905, 2840, 2240, 1916, 1777, 1712, 1632, 1604, 1506, 1483, 1448, 1419, 1393, 1376, 1356, 1260, 1214, 1188, 1165, 1085, 1024, 960, 927, 891, 856. HPLC analysis (Daicel Chiralpak AS-3, hexane/2-propanol=99.5:0.5, 0.3 mL/min, 254 nm UV detector; *t*<sub>r</sub>(*S*) = 34.6 min, *t*<sub>r</sub>(*R*) = 41.2 min).

**(S)-N-hydroxy-2-(6-methoxy-2-naphthyl)propionamidine (8).** To a stirred solution of **7** (1.14 g, 5.40 mmol) in dry EtOH (3 mL) and dry DMF (3 mL) were added H<sub>2</sub>NOH·HCl (1.13 g, 16.3 mmol) and dry triethylamine (1.65 g, 16.3 mmol), and then the solution was refluxed under a nitrogen



atmosphere for 10 h. After cooling to room temperature, the solution was concentrated under reduced pressure. The residue was dissolved in AcOEt (40 mL) and washed with H<sub>2</sub>O / *sat.* NaCl aq. = 1/1. The organic phase was dried over anhydrous Na<sub>2</sub>SO<sub>4</sub>, filtered and concentrated under reduced pressure. The crude product (0.893 g) was purified by silica gel column chromatography (eluent: CHCl<sub>3</sub>/MeOH = 30/1, v/v). The desired product **8** (0.272 g, 1.11 mmol, 21%, 51% ee) was obtained as a white solid. Mp: 142.0-143.5 °C (21% ee).  $[\alpha]_D^{18} = -10.5^\circ$  (c 0.506, MeOH) (21% ee). <sup>1</sup>H NMR (300 MHz, CDCl<sub>3</sub>): δ (ppm) 7.80-7.64 (m, 3H), 7.46-7.36 (m, 1H), 7.20-7.04 (m, 2H), 4.50-4.26 (br, 2H), 3.92 (s, 3H), 3.76 (q, *J* = 7.2 Hz, 1H), 1.58 (d, *J* = 7.2 Hz, 3H). <sup>13</sup>C NMR (100 MHz, CDCl<sub>3</sub>): δ (ppm) 157.7, 156.6, 136.9, 133.8, 129.2, 128.9, 127.5, 126.2, 125.6, 119.1, 105.7, 55.3, 41.8, 18.0. IR (KBr): ν (cm<sup>-1</sup>) 3479, 3372, 3268, 3055, 2976, 2936, 1663, 1637, 1607, 1586, 1505, 1486, 1460, 1449, 1418, 1390, 1266, 1231, 1216, 1192, 1174, 1160, 1124, 1078, 1026, 921, 889, 849. HPLC analysis (Daicel Chiralcel OD-3, hexane/2-propanol=80:20, 1.0 mL/min, 254 nm UV detector; *t<sub>r</sub>*(*S*) = 10.5 min, *t<sub>r</sub>*(*R*) = 13.1 min).

**(*S*)-*N*-acetoxy-2-(6-methoxy-2-naphthyl)propionamidine (**9**)**. To a stirred solution of **8** (0.267 g, 1.10 mmol) in THF (5 mL) were added pyridine (0.111 g, 1.40 mmol) and acetic anhydride (0.135 g, 1.32 mmol) at 0 °C, and then the solution was stirred at room temperature for 1 h. After the solvent was distilled off, the residue was dissolved in CHCl<sub>3</sub> (50 mL), and washed with 1 N HCl aq., *sat.* NaHCO<sub>3</sub> aq. and *sat.* NaCl aq. The organic phase was dried over anhydrous Na<sub>2</sub>SO<sub>4</sub>, filtered and concentrated under reduced pressure. The desired product **9** (0.301 g, 1.05 mmol, 96%, 51% ee) was obtained as a white solid, which was used for next step without further purification. Mp: 105.0-108.0 °C. <sup>1</sup>H NMR (300 MHz, CDCl<sub>3</sub>): δ (ppm) 7.80-7.68 (m, 3H), 7.50-7.38 (m, 1H), 7.22-7.08 (m, 2H), 4.66-4.42 (br, 2H), 4.04-3.84 (m, 4H), 2.19 (s, 3H), 1.67 (d, *J* = 7.2 Hz, 3H). <sup>13</sup>C NMR (100 MHz, CDCl<sub>3</sub>): δ (ppm) 168.8, 160.3, 157.9, 135.4, 133.9, 129.2, 128.9, 127.6, 126.2, 125.5, 119.3, 105.7, 55.4, 41.3, 19.9, 17.7. IR (KBr): ν (cm<sup>-1</sup>) 3449, 3332, 3196, 3060, 2962, 2936, 2841, 1744, 1627, 1505, 1486, 1464, 1439, 1418, 1392, 1371, 1266, 1227, 1173, 1119, 1027, 1010, 957, 927, 885, 855, 814. HPLC analysis (Daicel Chiralcel OD-3, hexane/2-propanol=80:20, 1.0 mL/min, 254 nm UV detector; *t<sub>r</sub>*(*S*) = 13.8 min, *t<sub>r</sub>*(*R*) = 30.7 min).

**2-(6-methoxy-2-naphthyl)propionamidine (**2b**)**. A suspension of **9** (0.720 g, 2.51 mmol) and 10% Pd-C (0.173 g) in EtOH (30 mL) was stirred under a hydrogen atmosphere at room temperature for 2 h. The solid was filtered off and the filtrate was concentrated under reduced pressure. The residue (0.752 g) was recrystallized from MeOH (8.5 mL) to give the acetate salt of the product as a solid. The separated filtrate was concentrated under reduced pressure and the residue was recrystallized from EtOH / H<sub>2</sub>O (4 mL / 0.5 mL). The combined solid was dissolved in CHCl<sub>3</sub> (30 mL) and 1 N NaOH aq. (20 mL) was added. The aqueous layer was separated and extracted with CHCl<sub>3</sub> (15 mL × 5). The combined organic layer was washed with *sat.* NaCl aq., dried over anhydrous Na<sub>2</sub>SO<sub>4</sub>, filtered and concentrated under reduced pressure. The desired product **2b** (0.597 g, 2.07 mmol, 83%,

racemic) was obtained as a white solid. Mp: 125.0-129.0 °C.  $[\alpha]_D^{26} = 0^\circ$  (c 1.00, CHCl<sub>3</sub>). <sup>1</sup>H NMR (300 MHz, CDCl<sub>3</sub>):  $\delta$  (ppm) 7.80-7.62 (m, 3H), 7.40-7.30 (m, 1H), 7.22-7.04 (m, 2H), 3.92 (s, 3H), 3.73 (q,  $J = 7.2$  Hz, 1H), 1.58 (d,  $J = 7.2$  Hz, 3H). IR (KBr):  $\nu$  (cm<sup>-1</sup>) 3321, 3163, 2966, 1684, 1635, 1606, 1505, 1485, 1455, 1436, 1392, 1264, 1216, 1163, 1030, 927, 891, 853.

**dehydroabietyl amide (11).**<sup>4</sup> To a stirred solution of dehydroabietic acid (**10**) (2.01 g, 6.09 mmol) in dry CH<sub>2</sub>Cl<sub>2</sub> (3 mL) were added DMF (3 drops) and oxalyl chloride (1.5 mL) under a nitrogen atmosphere at 0 °C, and the solution was refluxed for 2 h. After the volatile components were distilled off, dry toluene (10 mL) and 28% NH<sub>3</sub> aq. (3 mL) were added at 0 °C. The resulting suspension was stirred at room temperature for 2 h, and then was added to AcOEt (100 mL) and H<sub>2</sub>O (50 mL). The organic layer was separated and washed with *sat.* NaHCO<sub>3</sub> aq. and *sat.* NaCl aq. The organic phase was dried over anhydrous Na<sub>2</sub>SO<sub>4</sub>, filtered and concentrated under reduced pressure. The desired product **11** (1.95 g, 6.50 mmol, 97%) was obtained as a pale yellow solid, which was used for next step without further purification. Mp: 153.0-156.0 °C.  $[\alpha]_D^{25} = +41.1^\circ$  (c 1.00, CHCl<sub>3</sub>). <sup>1</sup>H NMR (300 MHz, CDCl<sub>3</sub>):  $\delta$  (ppm) 7.22-7.12 (m, 1H), 7.04-6.96 (m, 1H), 6.90-6.82 (m, 1H), 5.90-5.60 (br, 1H), 5.50-5.20 (br, 1H), 2.96-2.85 (m, 2H), 2.85-2.73 (m, 1H), 2.39-2.25 (m, 1H), 2.16-2.04 (m, 1H), 1.90-1.40 (m, 7H), 1.29 (s, 3H), 1.26-1.14 (m, 9H). IR (KBr):  $\nu$  (cm<sup>-1</sup>) 3428, 3328, 2927, 2867, 1629, 1575, 1498, 1456, 1383, 1362, 1085, 1036, 905, 883, 822.

**dehydroabietyl cyanide (12).**<sup>5</sup> To a stirred solution of **11** (5.49 g, 18.3 mmol) in dry CH<sub>2</sub>Cl<sub>2</sub> (100 mL) were added PPh<sub>3</sub> (7.20 g, 27.4 mmol), dry triethylamine (2.78 g, 27.4 mmol) and dry CCl<sub>4</sub> (4.23 g, 27.5 mmol) under a nitrogen atmosphere. The solution was refluxed for 17 h. After the reaction was quenched with H<sub>2</sub>O, the organic layer was separated, washed with 1 N HCl aq., dried over anhydrous Na<sub>2</sub>SO<sub>4</sub>, filtered and concentrated under reduced pressure. The crude product (14.8 g) was purified by silica gel column chromatography (eluent: hexane/CHCl<sub>3</sub> = 1/1, v/v). The desired product **12** (4.77 g, 16.9 mmol, 93%) was obtained as a white solid. Mp: 77.0-80.0 °C.  $[\alpha]_D^{26} = +37.0^\circ$  (c 1.00, CHCl<sub>3</sub>). <sup>1</sup>H NMR (300 MHz, CDCl<sub>3</sub>):  $\delta$  (ppm) 7.20-7.10 (m, 1H), 7.06-6.92 (m, 1H), 6.92-6.86 (m, 1H), 3.10-2.92 (m, 2H), 2.92-2.70 (m, 1H), 2.40-2.24 (m, 1H), 2.14-1.66 (m, 8H), 1.42 (s, 3H), 1.22 (d,  $J = 6.9$  Hz, 6H), 1.18 (s, 3H). <sup>13</sup>C NMR (100 MHz, CDCl<sub>3</sub>):  $\delta$  (ppm) 146.2, 145.4, 134.2, 127.0, 126.6, 124.2, 124.0, 46.8, 37.5, 37.4, 37.3, 37.2, 33.5, 29.8, 25.2, 23.9, 21.7, 18.9, 17.7. IR (KBr):  $\nu$  (cm<sup>-1</sup>) 3010, 2930, 2930, 2863, 2225, 1612, 1496, 1458, 1419, 1383, 889, 819. MS (MALDI-TOF)  $m/z$  calcd for C<sub>20</sub>H<sub>27</sub>N+Na<sup>+</sup>: 304.204 [M+Na]<sup>+</sup>; found: 304.245.

**N-hydroxy-dehydroabietyl amidine (13).** To a stirred solution of **12** (4.76 g, 16.9 mmol) in dry EtOH (35 mL) were added H<sub>2</sub>NOH•HCl (5.89 g, 84.8 mmol) and dry triethylamine (8.58 g, 84.8 mmol), and then the solution was refluxed under a nitrogen atmosphere for 28 h. After cooling to room temperature, the solution was concentrated under reduced pressure. The residue was dissolved in AcOEt (100 mL) and washed with H<sub>2</sub>O and *sat.* NaCl aq. The organic layer was dried over

anhydrous Na<sub>2</sub>SO<sub>4</sub>, filtered and concentrated under reduced pressure. The crude product (5.76 g) was purified by silica gel column chromatography (eluent: hexane/AcOEt = 2/1, v/v). The desired product **13** (1.66 g, 5.29 mmol, 31%) was obtained as a white solid. Mp: 89.7-91.7 °C.  $[\alpha]_D^{24} = +86.2^\circ$  (c 1.00, CHCl<sub>3</sub>). <sup>1</sup>H NMR (300 MHz, CDCl<sub>3</sub>): δ (ppm) 7.22-7.12 (m, 1H), 7.04-6.94 (m, 1H), 6.94-6.84 (m, 1H), 4.80-4.48 (br, 2H), 2.98-2.74 (m, 3H), 2.45-2.28 (m, 1H), 2.00-1.56 (m, 8H), 1.34-1.18 (m, 12H). <sup>13</sup>C NMR (100 MHz, CDCl<sub>3</sub>): δ (ppm) 160.0, 147.2, 145.9, 134.8, 127.0, 124.0, 123.9, 46.3, 42.8, 38.3, 37.5, 37.4, 33.5, 30.0, 25.5, 24.0, 20.1, 18.7, 16.0. IR (KBr): ν (cm<sup>-1</sup>) 3500, 3399, 3255, 2930, 1651, 1575, 1497, 1457, 1382, 1362, 1230, 1197, 1173, 1140, 1074, 923, 822. MS (MALDI-TOF) *m/z* calcd for C<sub>20</sub>H<sub>30</sub>N<sub>2</sub>O+H<sup>+</sup>: 315.244 [M+H]<sup>+</sup>; found: 315.242.

***N*-acetoxy-dehydroabietyl amidine (14).** To a stirred solution of **13** (1.64 g, 5.21 mmol) in THF (44 mL) were added pyridine (0.503 g, 6.36 mmol) and acetic anhydride (0.638 g, 6.25 mmol) at 0 °C, and then the solution was stirred at room temperature for 1 h. After the solvent was distilled off, the residue was dissolved in CHCl<sub>3</sub> (50 mL), and washed with 1 N HCl aq., *sat.* NaHCO<sub>3</sub> aq. and *sat.* NaCl aq. The organic layer was dried over anhydrous Na<sub>2</sub>SO<sub>4</sub>, filtered and concentrated under reduced pressure. The desired product **14** (1.69 g, 4.73 mmol, 91%) was obtained as a white solid, which was used for next step without further purification. Mp: 125.8-127.8 °C.  $[\alpha]_D^{24} = +66.6^\circ$  (c 1.00, CHCl<sub>3</sub>). <sup>1</sup>H NMR (300 MHz, CDCl<sub>3</sub>): δ (ppm) 7.24-7.12 (m, 1H), 7.06-6.98 (m, 1H), 6.92-6.86 (m, 1H), 4.86-4.64 (br, 2H), 2.98-2.74 (m, 3H), 2.44-2.28 (m, 1H), 2.20 (s, 3H), 1.98-1.62 (m, 8H), 1.31 (s, 3H), 1.26 (s, 3H), 1.22 (d, *J* = 6.9 Hz, 6H). <sup>13</sup>C NMR (100 MHz, CDCl<sub>3</sub>): δ (ppm) 169.7, 163.5, 147.0, 145.9, 134.6, 127.0, 124.0, 124.0, 46.4, 43.5, 38.1, 37.9, 37.4, 33.5, 30.0, 25.5, 24.0, 20.4, 20.2, 18.6, 16.0. IR (KBr): ν (cm<sup>-1</sup>) 3501, 3378, 2957, 2869, 1743, 1626, 1582, 1497, 1459, 1384, 1364, 1231, 1008, 939, 882, 822. MS (MALDI-TOF) *m/z* calcd for C<sub>22</sub>H<sub>32</sub>N<sub>2</sub>O<sub>2</sub>+Na<sup>+</sup>: 379.236 [M+Na]<sup>+</sup>; found: 379.217.

**dehydroabietyl amidine (2c).** A suspension of **14** (1.68 g, 4.72 mmol) and 10% Pd-C (0.614 g) in EtOH (60 mL) was stirred under a hydrogen atmosphere at room temperature for 1 day. Pd-C was filtered off and the filtrate was concentrated under reduced pressure. The residue was suspended in hexane, and the resulting solid was collected by filtration. The residue (1.44 g) was dissolved in CHCl<sub>3</sub> (30 mL) and *sat.* NaHCO<sub>3</sub> aq. (70 mL) was added. The aqueous layer was extracted with CHCl<sub>3</sub> (15 mL × 3). The combined organic layer was washed with *sat.* NaCl aq., dried over anhydrous Na<sub>2</sub>SO<sub>4</sub>, filtered and concentrated under reduced pressure. The desired product **2c** (1.22 g, 4.09 mmol, 87%) was obtained as a white solid. Mp: 76.7-79.7 °C.  $[\alpha]_D^{25} = +54.7^\circ$  (c 1.00, CHCl<sub>3</sub>). <sup>1</sup>H NMR (300 MHz, CDCl<sub>3</sub>): δ (ppm) 7.24-7.12 (m, 1H), 7.08-6.96 (m, 1H), 6.94-6.84 (m, 1H), 3.00-2.76 (m, 3H), 2.44-2.30 (m, 1H), 1.92-1.38 (m, 8H), 1.27 (s, 3H), 1.25 (s, 3H), 1.22 (d, *J* = 7.2, 6H). <sup>13</sup>C NMR (100 MHz, CDCl<sub>3</sub>): δ (ppm) 174.8, 147.0, 146.0, 134.5, 127.0, 124.1, 124.0, 46.8, 45.6, 38.2, 38.1, 37.3, 33.5, 29.9, 25.3, 24.0, 20.5, 19.0, 16.8. IR (KBr): ν (cm<sup>-1</sup>) 3345, 2958, 2869, 1634, 1577, 1497, 1459, 1382, 1363, 1201, 1171, 822. MS (MALDI-TOF) *m/z* calcd for

$C_{20}H_{30}N_2+H^+$ : 299.249 [M+H]<sup>+</sup>; found: 299.241.

**(rac)-6,6'-dibromo-1,1'-bi-2-naphthol (1b).**<sup>6</sup> *Rac*-1,1'-bi-2-naphthol (**1a**) (1.00 g, 3.49 mmol) was dissolved in dry CH<sub>2</sub>Cl<sub>2</sub> (40 mL) under a nitrogen atmosphere. After the mixture was cooled to -10 °C, bromine (1.51 g, 9.45 mmol) diluted with CH<sub>2</sub>Cl<sub>2</sub> (4 mL) was added dropwise over 30 min and the solution was stirred for an additional 2.5 h. After the solution was gradually warmed to room temperature and stirred for another 1 h, the reaction was quenched with *sat.* Na<sub>2</sub>SO<sub>3</sub> aq. (25 mL). The aqueous phase was extracted with CHCl<sub>3</sub> (15 mL × 3) and the combined organic phase was washed with *sat.* NaCl aq. dried over anhydrous MgSO<sub>4</sub>, filtered and concentrated under reduced pressure. The crude product (1.59 g) was recrystallized from toluene/heptane (7 mL/5 mL) and the desired product **1b** (1.11 g, 2.51 mmol, 72%) was obtained as colorless needles. Mp: 206.0-207.0 °C. <sup>1</sup>H NMR (300 MHz, CDCl<sub>3</sub>): δ (ppm) 8.06 (d, *J* = 1.8 Hz, 2H), 7.90 (d, *J* = 9.0 Hz, 2H), 7.46-7.32 (m, 4H), 6.97 (d, *J* = 9.0 Hz, 2H), 5.00 (s, 2H). IR (KBr): ν (cm<sup>-1</sup>) 3451, 2952, 1612, 1586, 1502, 1466, 1407, 1382, 1350, 1319, 1268, 1216, 1162, 1145, 1125, 1066, 951, 930, 876, 811.

**(rac)-6,6'-dimethyl-2,2'-bisphenol (1c).**<sup>7</sup> To a solution of 4,6-di-*tert*-butyl-4-methylphenol (1.01 g, 4.60 mmol) in CH<sub>2</sub>Cl<sub>2</sub> (9 mL) were added CuCl (45.5 mg, 0.460 mmol) and *N,N,N',N'*-tetramethylethylenediamine (80.1 mg, 0.689 mmol). The suspension was stirred under air at room temperature for 8 h. After addition of H<sub>2</sub>O (20 mL) to the reaction mixture, the whole was extracted with CHCl<sub>3</sub> (10 mL × 3). The organic phase was washed with *sat.* NaCl aq. and dried over anhydrous Na<sub>2</sub>SO<sub>4</sub>, filtered and concentrated under reduced pressure. The crude product (1.19 g) was purified by silica gel column chromatography (eluent: hexane/CHCl<sub>3</sub> = 1/1, v/v) to afford *rac*-3,3',5,5'-tetra-*tert*-butyl-6,6'-dimethyl-2,2'-bisphenol (0.594 g, 1.35 mmol, 59%) as a white solid. Mp: 244.0-245.3 °C. <sup>1</sup>H NMR (300 MHz, CDCl<sub>3</sub>): δ (ppm) 7.39 (s, 2H), 4.80 (s, 2H), 2.00 (s, 6H), 1.42 (s, 18H), 1.40 (s, 18H). IR (KBr): ν (cm<sup>-1</sup>) 3504, 2991, 2959, 2909, 2871, 1560, 1470, 1414, 1395, 1362, 1332, 1280, 1254, 1233, 1196, 1167, 1116, 1033, 927.

To a solution of *rac*-3,3',5,5'-tetra-*tert*-butyl-6,6'-dimethyl-2,2'-bisphenol (0.303 g, 0.691 mmol) in dry toluene (5 mL) was added AlCl<sub>3</sub> (39.2 mg, 0.294 mmol) in small portions at 0 °C under a nitrogen atmosphere. The suspension was stirred at 50 °C for 18 h, and AlCl<sub>3</sub> (99.3 mg, 0.745 mmol) was added to the suspension at 0 °C. The suspension was stirred at 50 °C for 3 h, and AlCl<sub>3</sub> (58.8 mg, 0.441 mmol) was added to the suspension at 0 °C. The suspension was stirred at 50 °C for 3 h, and AlCl<sub>3</sub> (58.4 mg, 0.438 mmol) was added to the suspension at 0 °C. After the suspension was stirred at 50 °C for 13 h, the suspension was cooled to 0 °C and carefully quenched by addition of H<sub>2</sub>O (14 mL) and 3 N HCl aq. (56 mL). The organic phase was separated and the aqueous phase was extracted with Et<sub>2</sub>O (10 mL × 3). The combined organic phase was extracted with 3 N NaOH aq. (10 mL × 3). The aqueous phase was acidified with 6 N HCl aq. and extracted with Et<sub>2</sub>O (10 mL × 3). The organic phase was dried over anhydrous Na<sub>2</sub>SO<sub>4</sub>, filtered and concentrated under reduced

pressure. The desired product **1c** (0.145 g, 0.677 mmol, 98%) was obtained as a white solid. Mp: 159.7-162.7 °C. <sup>1</sup>H NMR (300 MHz, CDCl<sub>3</sub>): δ (ppm) 7.32-7.18 (m, 2H), 7.00-6.86 (m, 4H), 4.66 (s, 2H), 2.01 (s, 6H). IR (KBr): ν (cm<sup>-1</sup>) 3464, 3413, 3034, 2973, 2915, 1605, 1575, 1465, 1378, 1335, 1281, 1261, 1180, 1090, 1025, 1006, 947, 883.

**(rac)-1-[hydroxy(phenyl)methyl]-2-naphthol (1d).**<sup>8</sup> To a stirred suspension of Mg turnings (0.304 g, 12.5 mmol) in dry THF (4 mL) under a nitrogen atmosphere was added dropwise a solution of bromobenzene (1.96 g, 12.5 mmol) in dry THF (9 mL) over 1.5 h at room temperature. After formation of the Grignard reagent has started, the suspension was stirred at room temperature for 30 min, and then refluxed for 1 h. After cooling with an ice bath, 2-hydroxy-1-naphthaldehyde (0.861 g, 5.00 mmol), which was dissolved in dry THF (5.5 mL), was added dropwise to the mixture over 30 min and the suspension was stirred for 2 h at room temperature. The reaction was quenched with *sat.* NH<sub>4</sub>Cl aq. (5 mL) and H<sub>2</sub>O (15 mL) and the whole was extracted with CHCl<sub>3</sub> (10 mL × 3). The organic phase was washed with *sat.* NaCl aq., dried over anhydrous Na<sub>2</sub>SO<sub>4</sub>, filtered and concentrated under reduced pressure. The crude product was purified by silica gel column chromatography (eluent: hexane/AcOEt = 4/1, v/v). The desired product **1d** (1.23 g, 4.91 mmol, 98%) was obtained as a white solid. Mp: 118.5-120.3 °C. <sup>1</sup>H NMR (300 MHz, CDCl<sub>3</sub>): δ (ppm) 9.21 (s, 1H), 7.82-7.62 (m, 3H), 7.50-7.12 (m, 8H), 6.82 (d, *J* = 2.6 Hz, 1H), 2.92 (d, *J* = 2.6 Hz, 1H). IR (KBr): ν (cm<sup>-1</sup>) 3363, 3029, 1625, 1602, 1521, 1469, 1455, 1411, 1326, 1265, 1226, 1154, 1065, 1011, 939, 830.

#### Enantiomer separation of phenols (**1**) with chiral amidines (**2**)

Equimolar amounts of **2** and *rac*-**1** (0.250 mmol) were dissolved in MeOH or CHCl<sub>3</sub>, and the solution was concentrated under reduced pressure to give a salt. An appropriate solvent was added to the salt with heating until a homogeneous solution was formed. The solution was gradually cooled to room temperature and left at the temperature for several days to induce crystallization. The salt **1·2** was collected by filtration and dried in vacuo at room temperature. The yield was calculated based on a half amount of *rac*-**1** initially used. A part of the salt was dissolved in ethyl acetate, and the organic phase was washed with 1 N HCl aq. to remove **2**. The organic phase was dried over anhydrous Na<sub>2</sub>SO<sub>4</sub>, filtered and concentrated under reduced pressure. The residue was purified by silica gel preparative TLC to give **2**. The enantiomeric excess of **2** was determined by chiral HPLC analysis. **1a** (Column: Chiralcel OD-3, Eluent: 2-propanol/ hexane = 1/9, Flow rate: 0.5 mL / min, Detection: 254 nm, Retention time: *t<sub>r</sub>(S)* = 29.0 min, *t<sub>r</sub>(R)* = 30.7 min). **1b** (Column: Chiralcel OD-3, Eluent: 2-propanol/ hexane = 1/9, Flow rate: 1.0 mL / min, Detection: 254 nm, Retention time: *t<sub>r</sub>(1<sup>st</sup>)* = 15.6 min, *t<sub>r</sub>(2<sup>nd</sup>)* = 35.0 min). **1c** (Column: Chiralcel OD-3, Eluent: 2-propanol/ hexane = 1/9, Flow rate: 0.5 mL / min, Detection: 254 nm, Retention time: *t<sub>r</sub>(S)* = 17.6 min, *t<sub>r</sub>(R)* = 32.1 min).

#### X-ray crystallographic analysis

Single crystals suitable for X-ray diffraction analysis were prepared by slow evaporation of the saturated solutions of the salt. X-ray crystallographic data were collected on a Bruker Smart APEX II diffractometer with graphite monochromated Mo K $\alpha$  radiation. Data collections were carried out at 150 K. The structures were solved by a direct method (SIR 2014) and refined by SHELXL-2013 or SHELXL-2018 programs.<sup>9</sup> Crystallographic information files have been deposited with the Cambridge Structural Database.

## References

1) ref 12b in the manuscript.

2) refs 23 in the manuscript.

3) refs 24 in the manuscript.

4) ref 25 in the manuscript.

5) ref 26 in the manuscript.

6) ref 27 in the manuscript.

7) refs 28 in the manuscript.

8) ref 29 in the manuscript.

9) ref 30 in the manuscript.

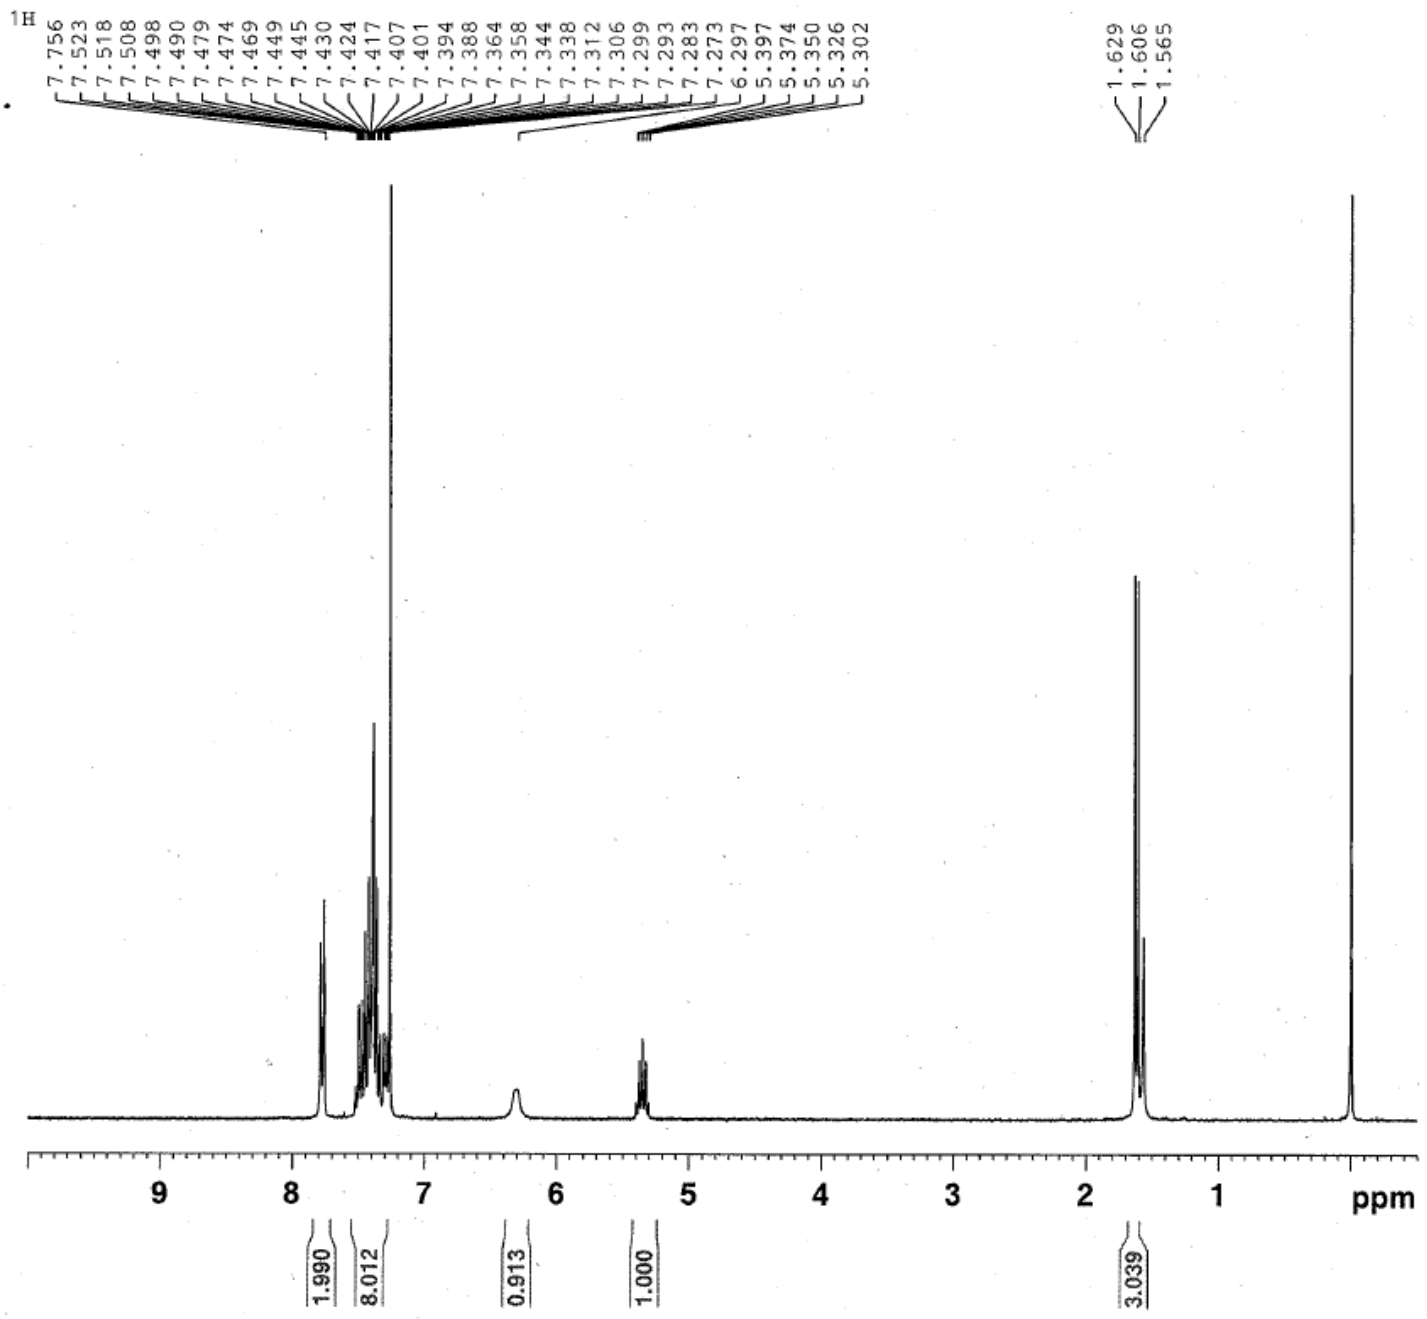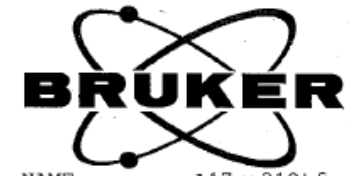

NAME A17mc219tf  
 EXPNO 17062301  
 PROCNO 1  
 Date\_ 20170623  
 Time 9.35  
 INSTRUM spect  
 PROBHD 5 mm PABBO BB-  
 PULPROG zg30  
 TD 65536  
 SOLVENT CDCl3  
 NS 8  
 DS 2  
 SWH 6188.119 Hz  
 FIDRES 0.094423 Hz  
 AQ 5.2953587 sec  
 RG 203  
 DW 80.800 usec  
 DE 6.50 usec  
 TE 296.1 K  
 D1 1.00000000 sec  
 TD0 1

----- CHANNEL f1 -----  
 NUC1 1H  
 P1 15.00 usec  
 PL1 1.20 dB  
 PL1W 8.19348145 W  
 SFO1 300.1318534 MHz  
 SI 32768  
 SF 300.1300059 MHz  
 WDW EM  
 SSB 0  
 LB 0.30 Hz  
 GB 0  
 PC 1.00

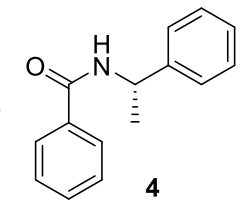



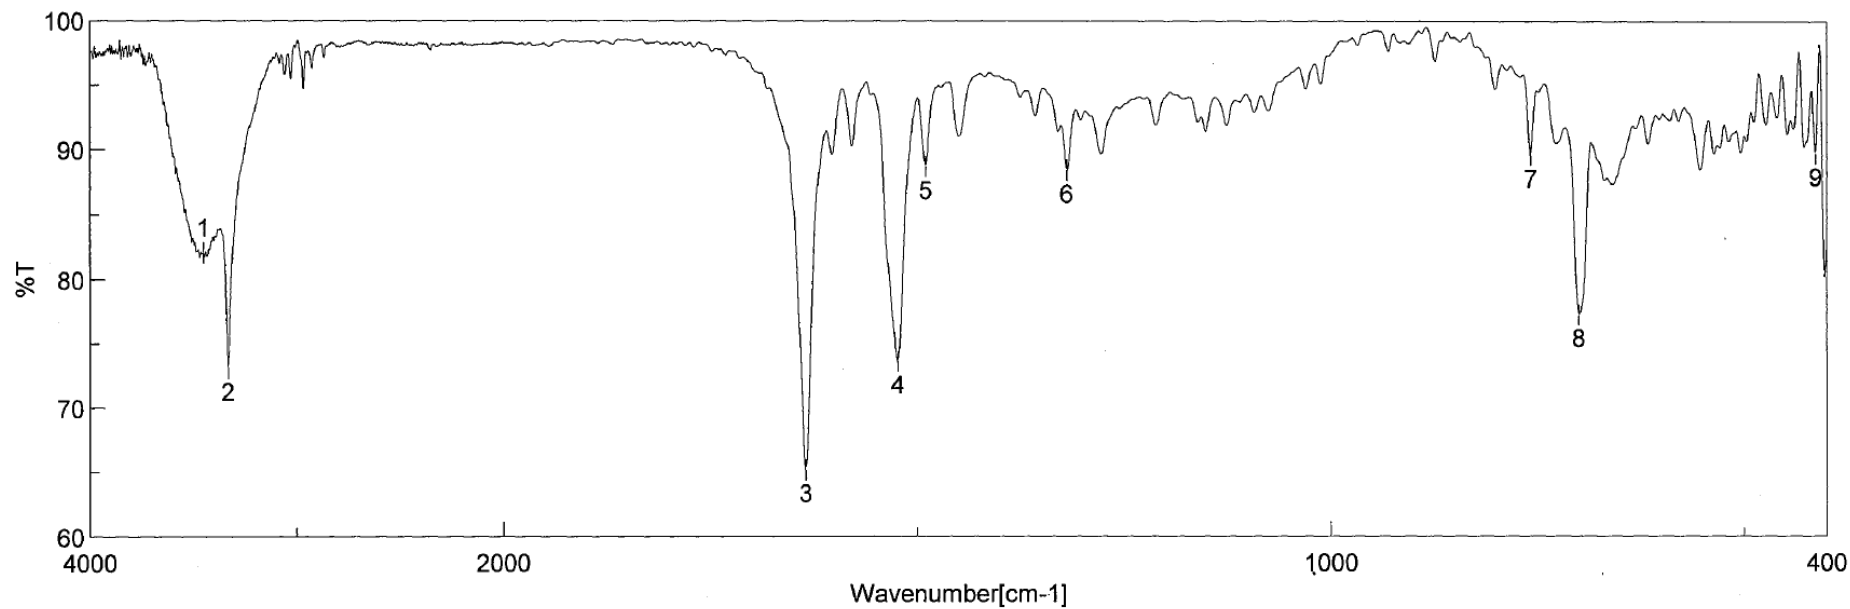

積算回数  
ゼロフィリング  
ゲイン  
測定日時  
測定者  
ファイル名  
サンプル名  
コメント

24  
ON  
8  
2017/06/28 11:00  
takase  
Memory#2  
S-MBA-Ph-amide

分解  
アポダイゼーション  
スキャンスピード  
更新日時

4 cm-1  
Cosine  
2 mm/sec  
2017/06/28 11:01

|             |       |             |       |             |       |             |       |
|-------------|-------|-------------|-------|-------------|-------|-------------|-------|
| 1: 3450.99, | 82.11 | 2: 3331.43, | 73.06 | 3: 1634.38, | 65.17 | 4: 1523.49, | 73.66 |
| 5: 1489.74, | 88.71 | 6: 1319.07, | 88.45 | 7: 757.89,  | 89.60 | 8: 700.03,  | 77.32 |
| 9: 413.66,  | 89.75 |             |       |             |       |             |       |

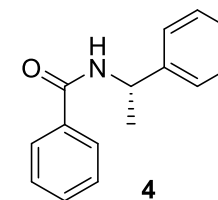

1H

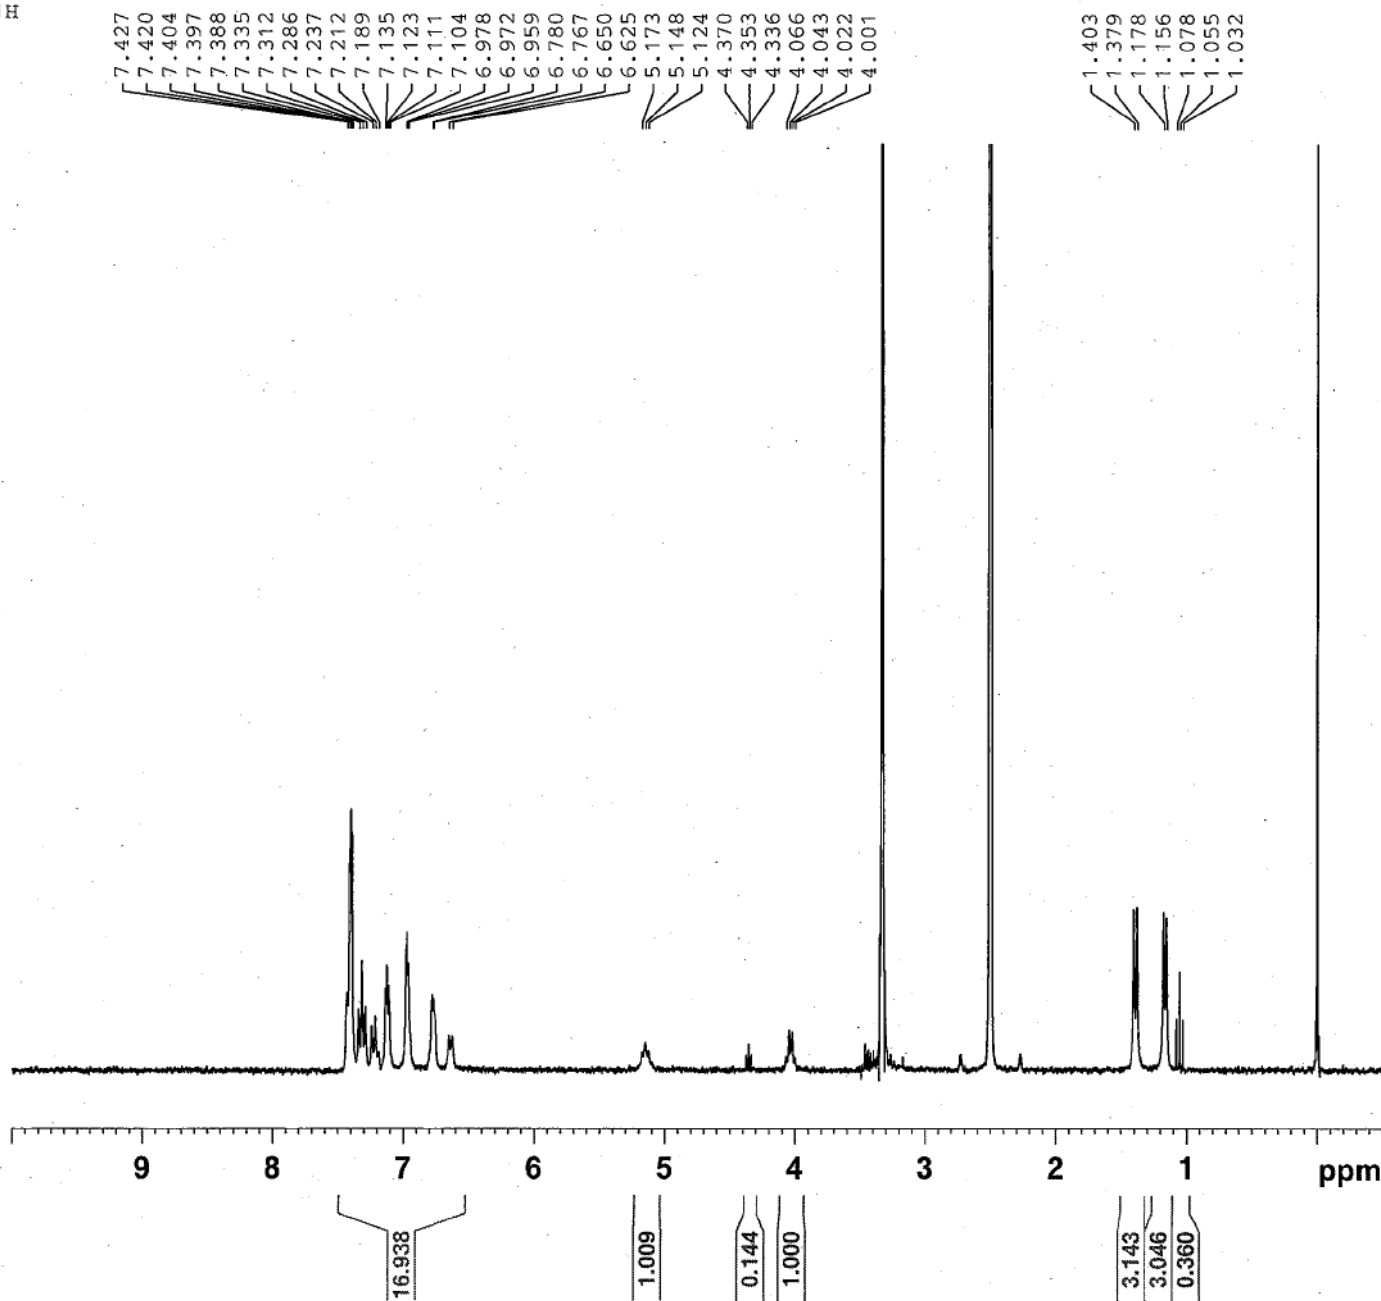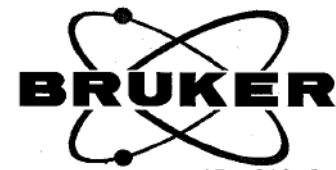

NAME A17mc219tf  
 EXPNO 17081001  
 PROCNO 1  
 Date\_ 20170810  
 Time\_ 9.41  
 INSTRUM spect  
 PROBHD 5 mm PABBO BB-  
 PULPROG zg30  
 TD 65536  
 SOLVENT DMSO  
 NS 8  
 DS 2  
 SWH 6188.119 Hz  
 FIDRES 0.094423 Hz  
 AQ 5.2953587 sec  
 RG 203  
 DW 80.800 usec  
 DE 6.50 usec  
 TE 296.4 K  
 D1 1.0000000 sec  
 TD0 1

----- CHANNEL f1 -----  
 NUC1 1H  
 P1 15.00 usec  
 PL1 1.20 dB  
 PL1W 8.19348145 W  
 SFO1 300.1318534 MHz  
 SI 32768  
 SF 300.1300007 MHz  
 WDW EM  
 SSB 0  
 LB 0.30 Hz  
 GB 0  
 PC 1.00

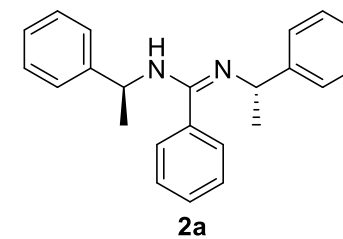

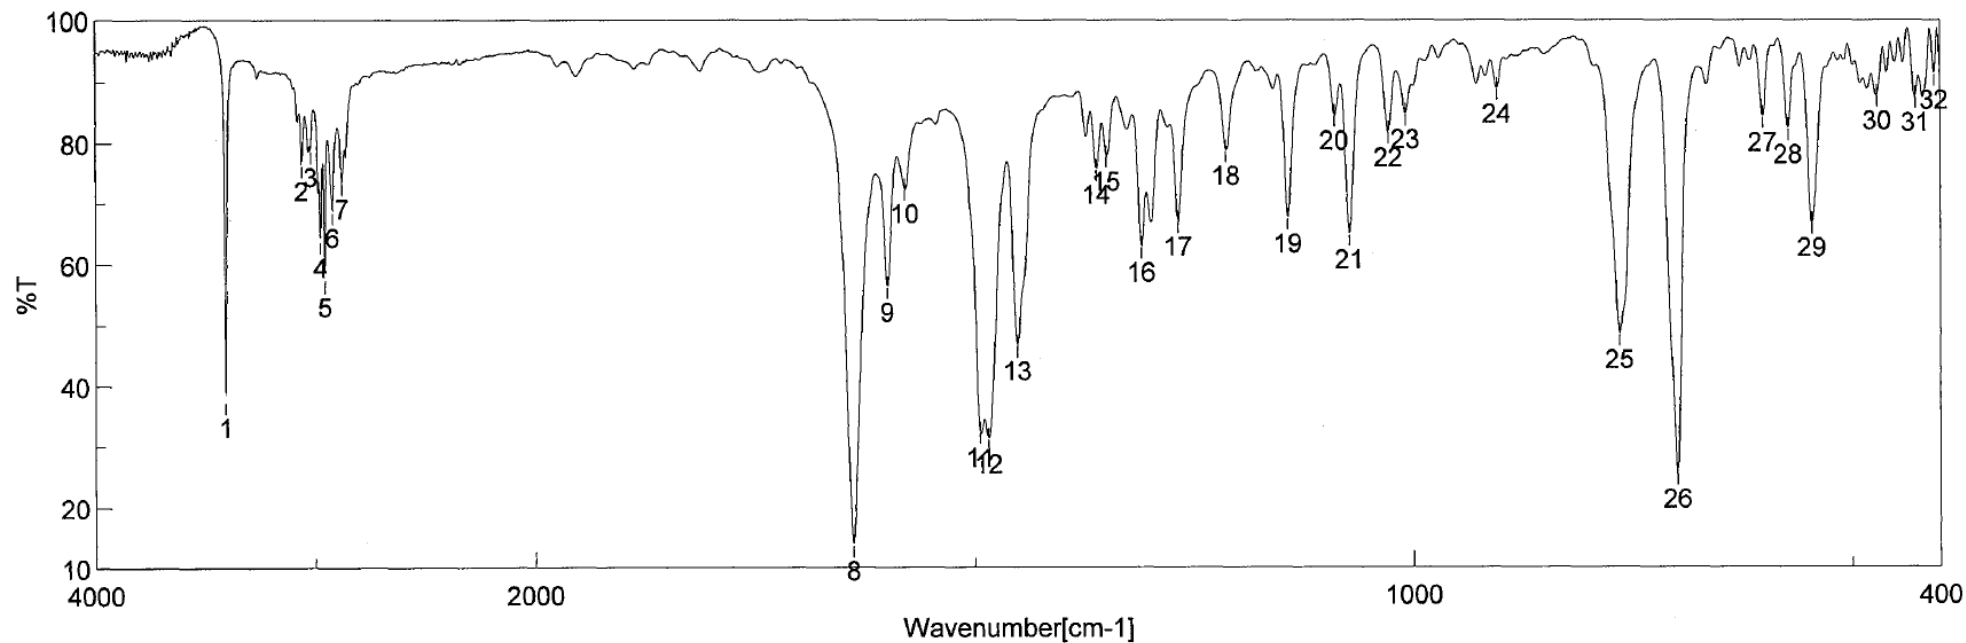

積算回数  
ゼロフィリング  
ゲイン  
測定日時  
測定者  
ファイル名  
サンプル名  
コメント

16  
ON  
8  
2017/07/31 17:32  
takase  
Memory#2  
s-MBA amidine

分解  
アポダイゼーション  
スキャンスピード  
更新日時

4 cm-1  
Cosine  
2 mm/sec  
2017/07/31 17:33

|     |          |       |     |          |       |     |          |       |     |          |       |
|-----|----------|-------|-----|----------|-------|-----|----------|-------|-----|----------|-------|
| 1:  | 3406.64, | 37.23 | 2:  | 3059.51, | 76.24 | 3:  | 3019.98, | 78.54 | 4:  | 2974.66, | 63.56 |
| 5:  | 2955.38, | 57.04 | 6:  | 2919.70, | 68.47 | 7:  | 2877.27, | 73.23 | 8:  | 1637.27, | 13.56 |
| 9:  | 1598.70, | 56.18 | 10: | 1578.45, | 72.41 | 11: | 1493.60, | 32.21 | 12: | 1483.96, | 31.16 |
| 13: | 1451.17, | 46.51 | 14: | 1360.53, | 75.60 | 15: | 1348.96, | 77.78 | 16: | 1309.43, | 62.73 |
| 17: | 1267.97, | 67.01 | 18: | 1213.01, | 78.74 | 19: | 1142.62, | 67.49 | 20: | 1089.58, | 84.56 |
| 21: | 1072.23, | 64.86 | 22: | 1027.87, | 81.75 | 23: | 1008.59, | 84.75 | 24: | 904.45,  | 88.94 |
| 25: | 765.60,  | 48.44 | 26: | 699.07,  | 25.35 | 27: | 601.68,  | 84.27 | 28: | 572.75,  | 82.28 |
| 29: | 545.76,  | 66.84 | 30: | 471.51,  | 87.83 | 31: | 428.12,  | 87.58 | 32: | 406.91,  | 91.21 |

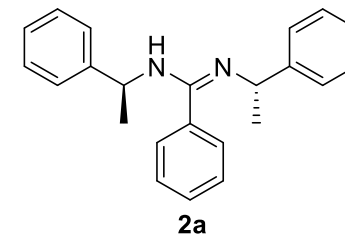

1H CPQNP

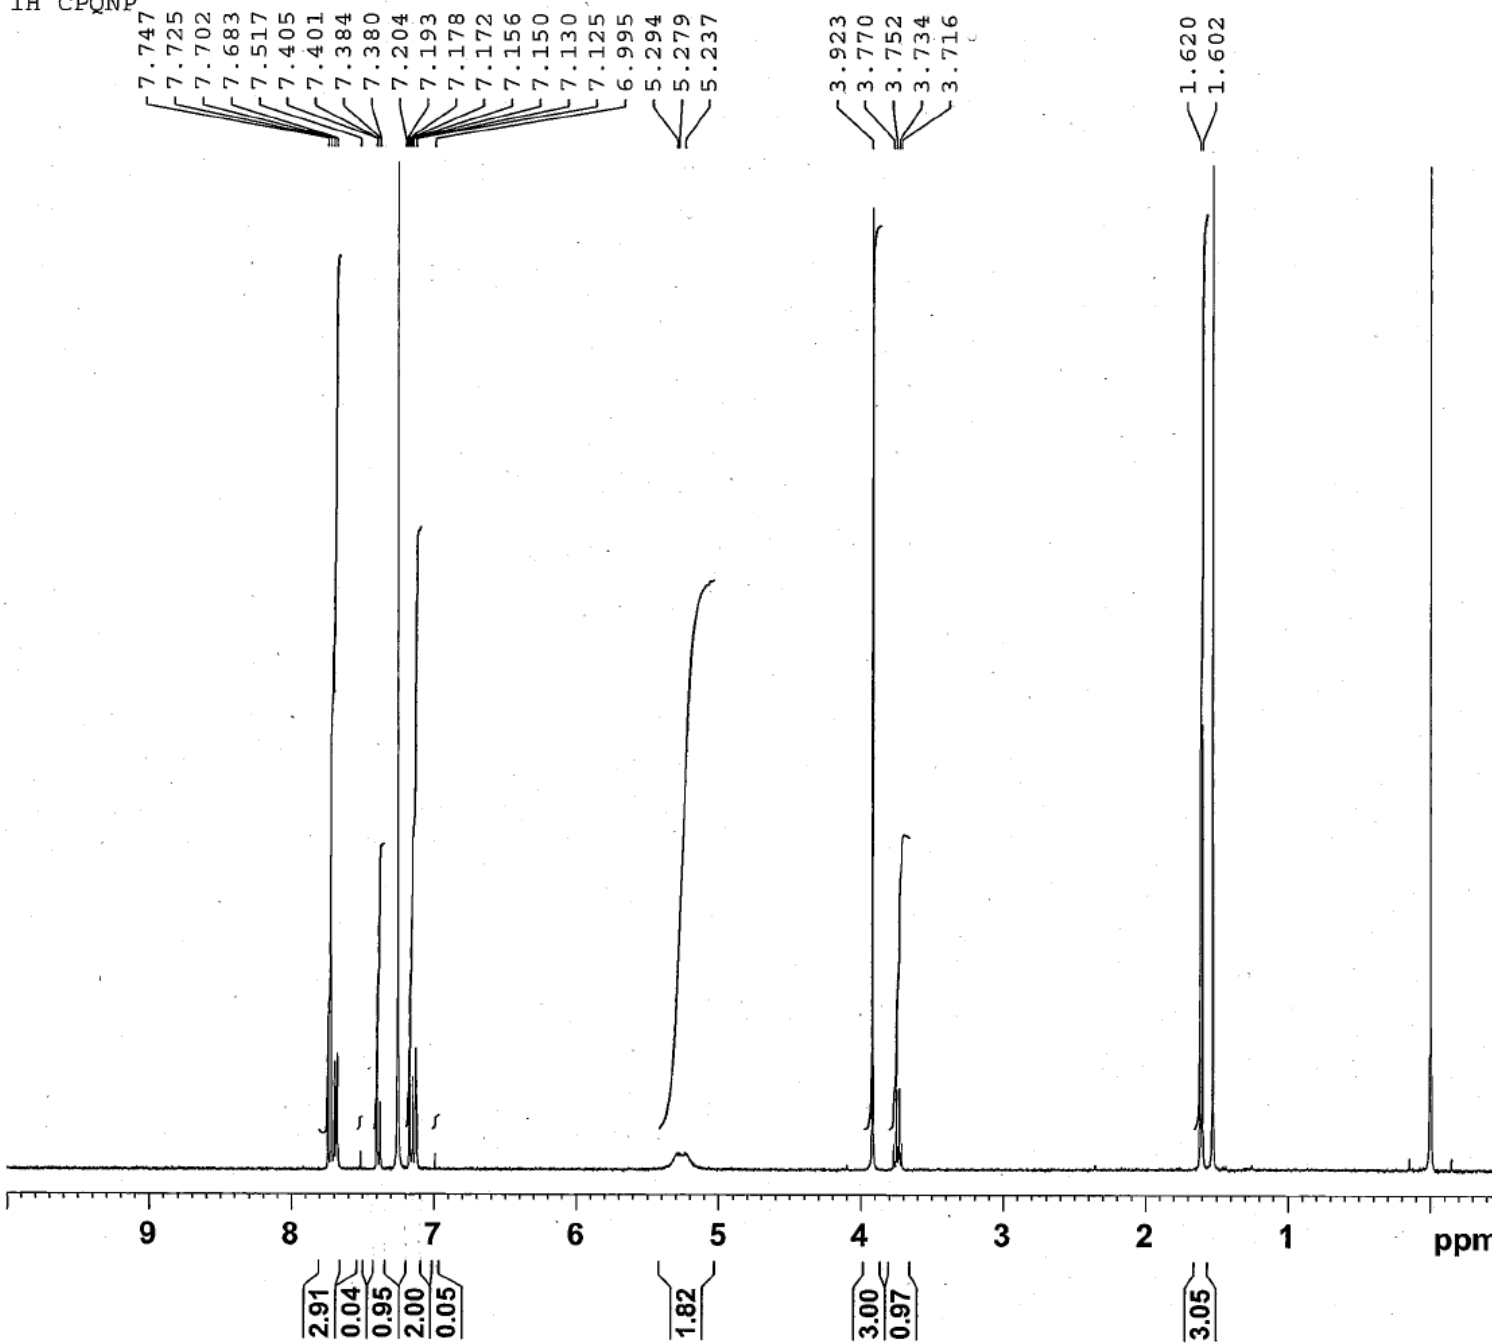

7.747  
7.725  
7.702  
7.683  
7.517  
7.405  
7.401  
7.384  
7.380  
7.204  
7.193  
7.178  
7.172  
7.156  
7.150  
7.130  
7.125  
6.995  
5.294  
5.279  
5.237

3.923  
3.770  
3.752  
3.734  
3.716

1.620  
1.602

2.91  
0.04  
0.95  
2.00  
0.05

1.82

3.00  
0.97

3.05

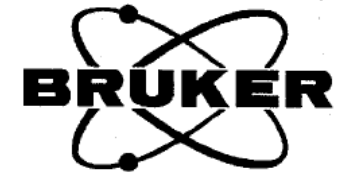

Current Data Parameters  
NAME A17mc219tf  
EXPNO 18020201  
PROCNO 1

F2 - Acquisition Parameters  
Date\_ 20180202  
Time 18.04  
INSTRUM spect  
PROBHD 5 mm CPQNP 1H/  
PULPROG zg30  
TD 65536  
SOLVENT CDCl3  
NS 4  
DS 2  
SWH 8305.647 Hz  
FIDRES 0.126734 Hz  
AQ 3.9453173 sec  
RG 7.21  
DW 60.200 usec  
DE 10.00 usec  
TE 300.0 K  
D1 1.00000000 sec  
TD0 1

==== CHANNEL f1 =====  
NUC1 1H  
P1 15.00 usec  
PLW1 5.19999981 W  
SFO1 400.1324708 MHz

F2 - Processing parameters  
SI 32768  
SF 400.1300101 MHz  
WDW EM  
SSB 0  
LB 0.30 Hz  
GB 0  
PC 1.00

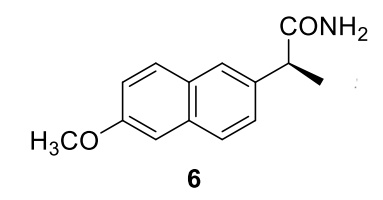

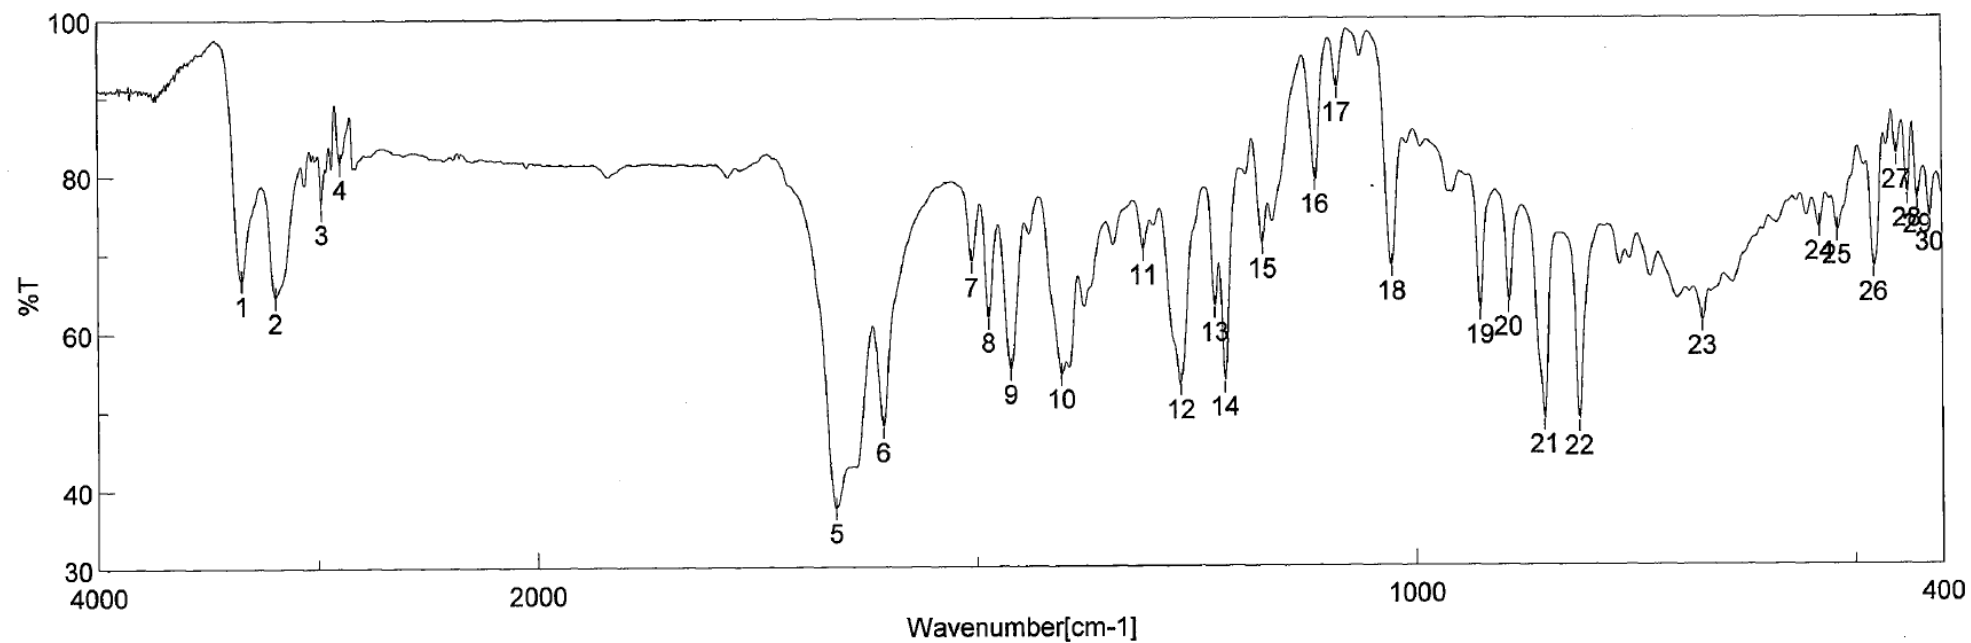

積算回数  
ゼロフィリング  
ゲイン  
測定日時  
測定者  
ファイル名  
サンプル名  
コメント

16  
ON  
8  
2017/12/23 12:17  
takase  
Memory#2  
naproxene amide

分解  
アポダイゼーション  
スキャンスピード  
更新日時

4 cm-1  
Cosine  
2 mm/sec  
2017/12/23 12:17

|              |       |              |       |              |       |              |       |
|--------------|-------|--------------|-------|--------------|-------|--------------|-------|
| 1: 3347.82,  | 66.80 | 2: 3194.51,  | 64.60 | 3: 2983.34,  | 75.84 | 4: 2897.52,  | 81.55 |
| 5: 1660.41,  | 37.51 | 6: 1606.41,  | 47.89 | 7: 1505.17,  | 68.91 | 8: 1485.88,  | 61.81 |
| 9: 1460.81,  | 55.22 | 10: 1402.96, | 54.57 | 11: 1309.43, | 70.44 | 12: 1267.00, | 53.25 |
| 13: 1228.43, | 63.17 | 14: 1216.86, | 53.60 | 15: 1173.47, | 71.20 | 16: 1113.69, | 79.37 |
| 17: 1088.62, | 91.12 | 18: 1026.91, | 68.36 | 19: 926.63,  | 62.74 | 20: 893.84,  | 63.75 |
| 21: 853.35,  | 48.71 | 22: 813.81,  | 48.49 | 23: 674.00,  | 61.27 | 24: 539.97,  | 73.18 |
| 25: 519.72,  | 72.68 | 26: 478.26,  | 68.05 | 27: 452.23,  | 82.28 | 28: 439.69,  | 77.36 |
| 29: 428.12,  | 76.57 | 30: 414.62,  | 74.27 |              |       |              |       |

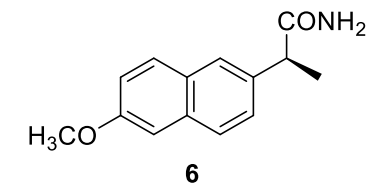

1H

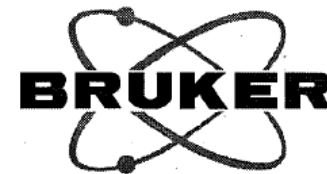

Current Data Parameters  
 NAME A17mc219tf  
 EXPNO 17122101  
 PROCNO 1

F2 - Acquisition Parameters  
 Date 20171221  
 Time 17.01  
 INSTRUM spect  
 PROBHD 5 mm PABBO BB-  
 PULPROG zg30  
 TD 65536  
 SOLVENT CDC13  
 NS 8  
 DS 2  
 SWH 6188.119 Hz  
 FIDRES 0.094423 Hz  
 AQ 5.2953587 sec  
 RG 203  
 DW 80.800 usec  
 DE 6.50 usec  
 TE 296.6 K  
 D1 1.00000000 sec  
 TD0 1

===== CHANNEL f1 =====  
 NUC1 1H  
 P1 15.00 usec  
 PL1 1.20 dB  
 PL1W 8.19348145 W  
 SFO1 300.1318534 MHz

F2 - Processing parameters  
 SI 32768  
 SF 300.1300061 MHz  
 WDW EM  
 SSB 0  
 LB 0.30 Hz  
 GB 0  
 PC 1.00

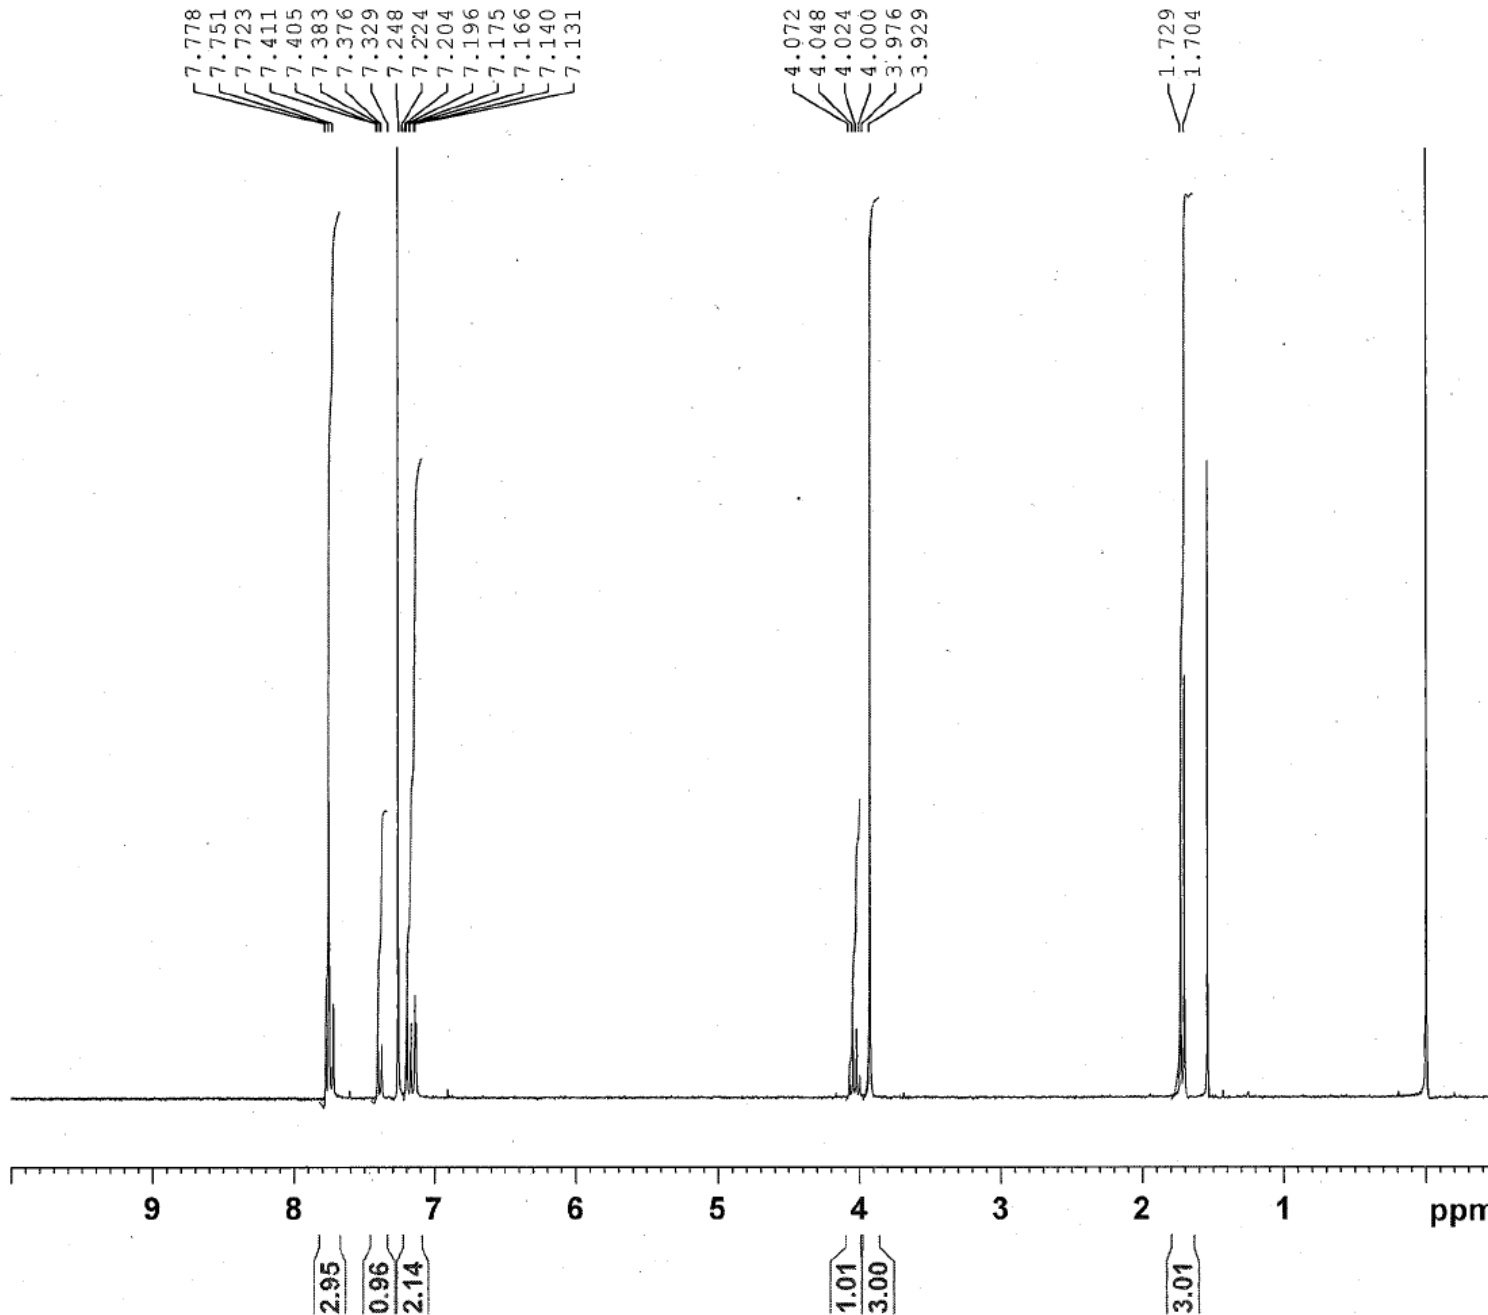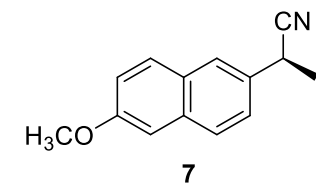

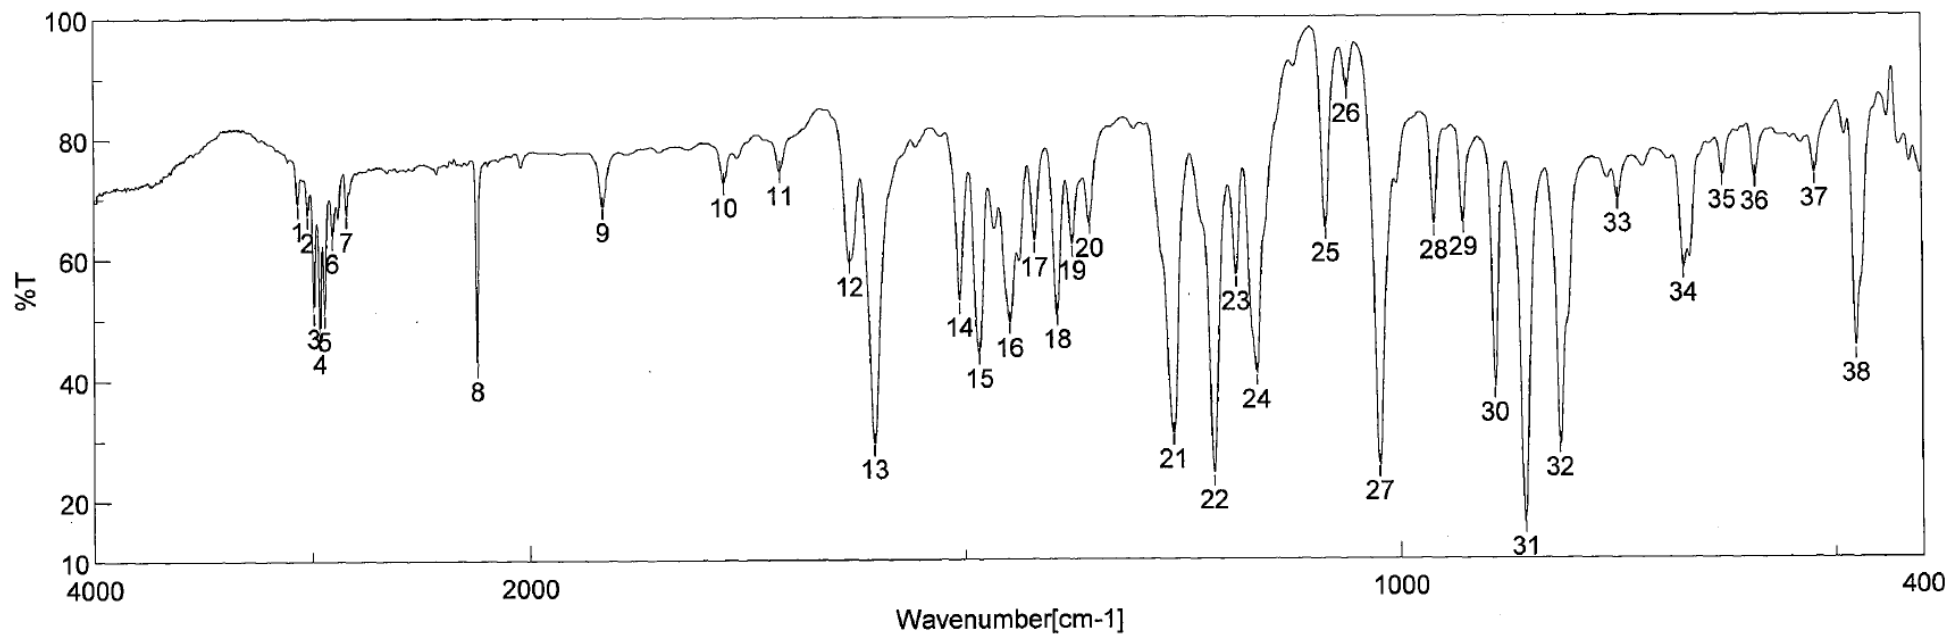

積算回数  
ゼロフィリング  
ゲイン  
測定日時  
測定者  
ファイル名  
サンプル名  
コメント

16  
ON  
8  
2017/12/23 12:07  
takase  
Memory#2  
naproxene nitrile

分解  
アボダイゼーション  
スキャンスピード  
更新日時

4 cm-1  
Cosine  
2 mm/sec  
2017/12/23 12:08

|              |       |              |       |              |       |              |       |
|--------------|-------|--------------|-------|--------------|-------|--------------|-------|
| 1: 3065.30,  | 68.69 | 2: 3019.98,  | 66.91 | 3: 2992.02,  | 51.16 | 4: 2963.09,  | 46.98 |
| 5: 2941.88,  | 50.67 | 6: 2905.24,  | 63.49 | 7: 2840.63,  | 67.05 | 8: 2239.91,  | 42.36 |
| 9: 1915.93,  | 68.52 | 10: 1777.08, | 72.54 | 11: 1712.48, | 74.52 | 12: 1632.45, | 59.39 |
| 13: 1604.48, | 29.18 | 14: 1506.13, | 52.65 | 15: 1482.99, | 44.21 | 16: 1448.28, | 49.27 |
| 17: 1419.35, | 62.59 | 18: 1393.32, | 50.67 | 19: 1375.96, | 61.97 | 20: 1355.71, | 65.75 |
| 21: 1260.25, | 30.81 | 22: 1213.97, | 23.95 | 23: 1187.94, | 56.92 | 24: 1164.79, | 40.68 |
| 25: 1084.76, | 64.80 | 26: 1059.69, | 88.07 | 27: 1024.02, | 25.39 | 28: 960.38,  | 65.22 |
| 29: 926.63,  | 65.72 | 30: 890.95,  | 38.36 | 31: 856.24,  | 16.01 | 32: 816.71,  | 29.20 |
| 33: 750.17,  | 69.58 | 34: 674.96,  | 58.15 | 35: 629.64,  | 73.51 | 36: 592.04,  | 73.25 |
| 37: 523.58,  | 73.80 | 38: 476.33,  | 44.80 |              |       |              |       |

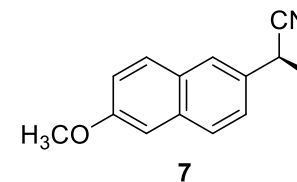

1H

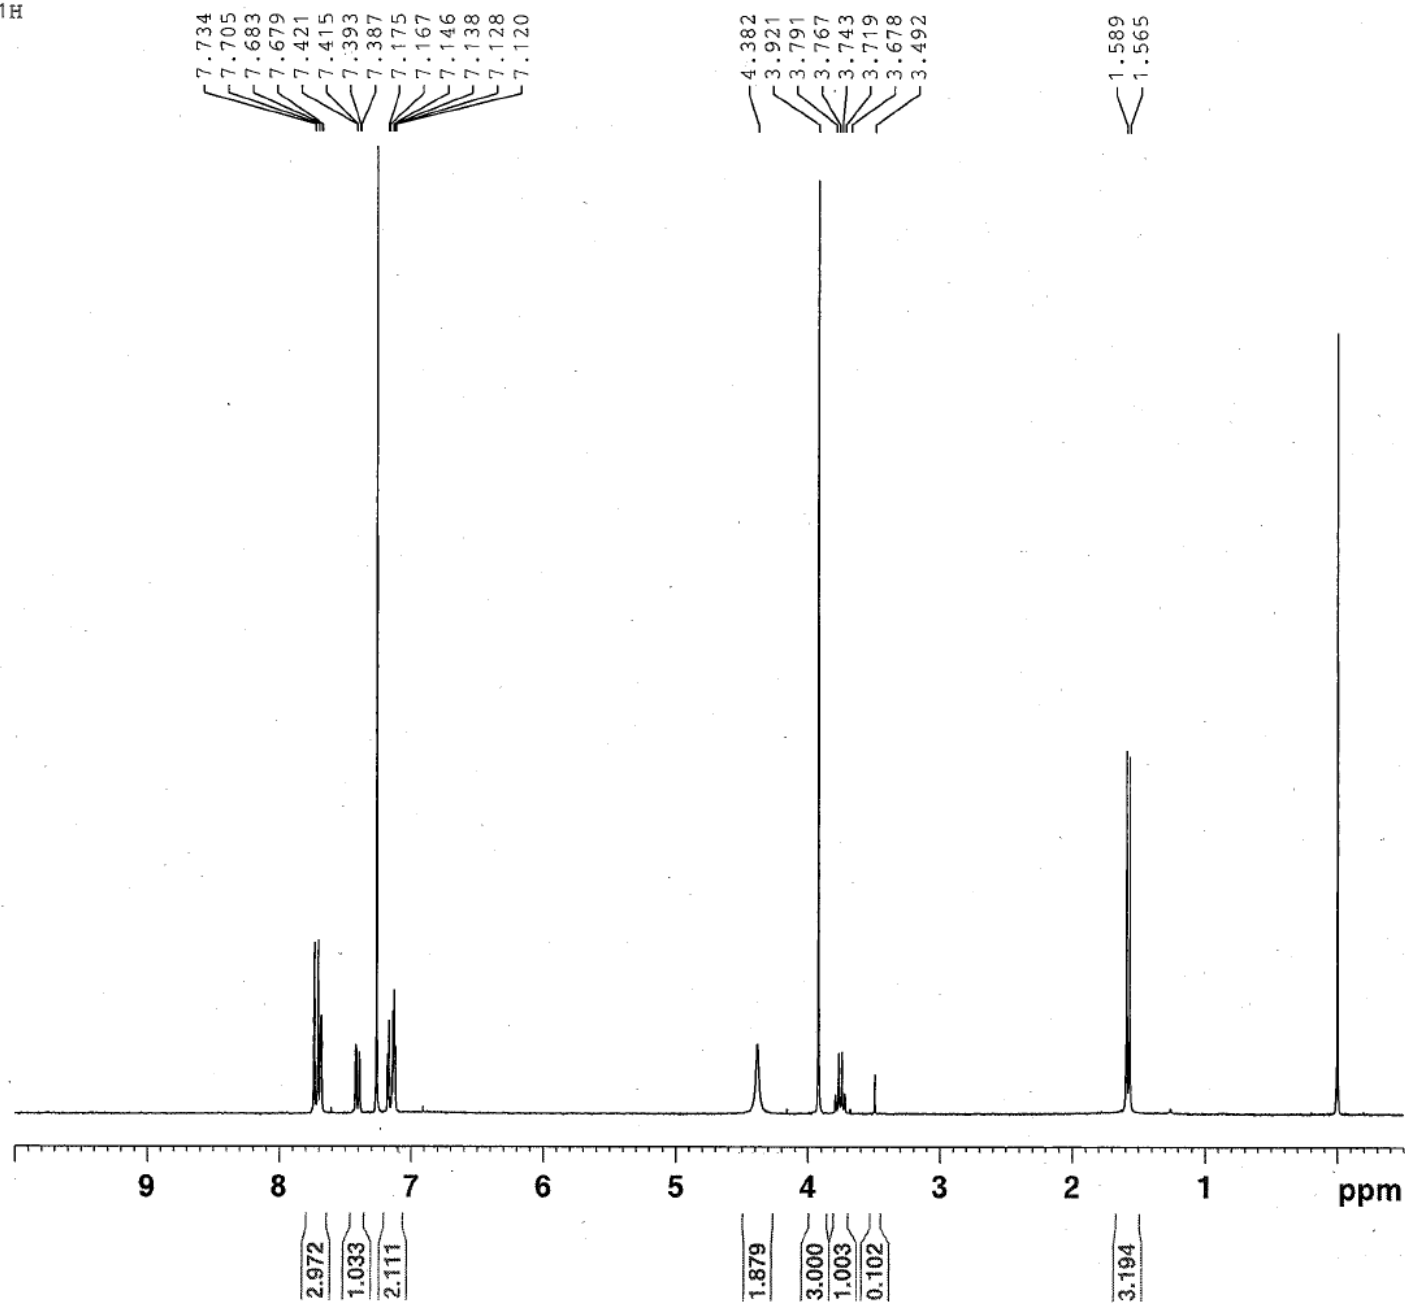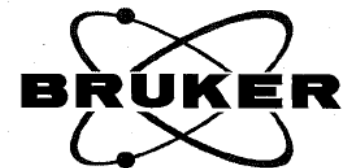

NAME A17mc219tf  
EXPNO 18010903  
PROCNO 1  
Date\_ 20180109  
Time 18.05  
INSTRUM spect  
PROBHD 5 mm PABBO BB-  
PULPROG zg30  
TD 65536  
SOLVENT CDCl3  
NS 8  
DS 2  
SWH 6188.119 Hz  
FIDRES 0.094423 Hz  
AQ 5.2953587 sec  
RG 203  
DW 80.800 usec  
DE 6.50 usec  
TE 296.8 K  
D1 1.00000000 sec  
TD0 1

==== CHANNEL f1 =====  
NUC1 1H  
P1 15.00 usec  
PL1 1.20 dB  
PL1W 8.19348145 W  
SFO1 300.1318534 MHz  
SI 32768  
SF 300.1300061 MHz  
WDW EM  
SSB 0  
LB 0.30 Hz  
GB 0  
PC 1.00

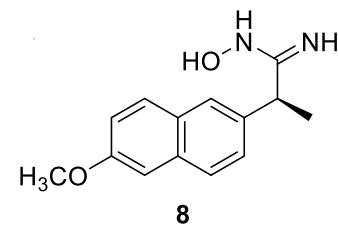



<sup>13</sup>C with dec. CPQNP

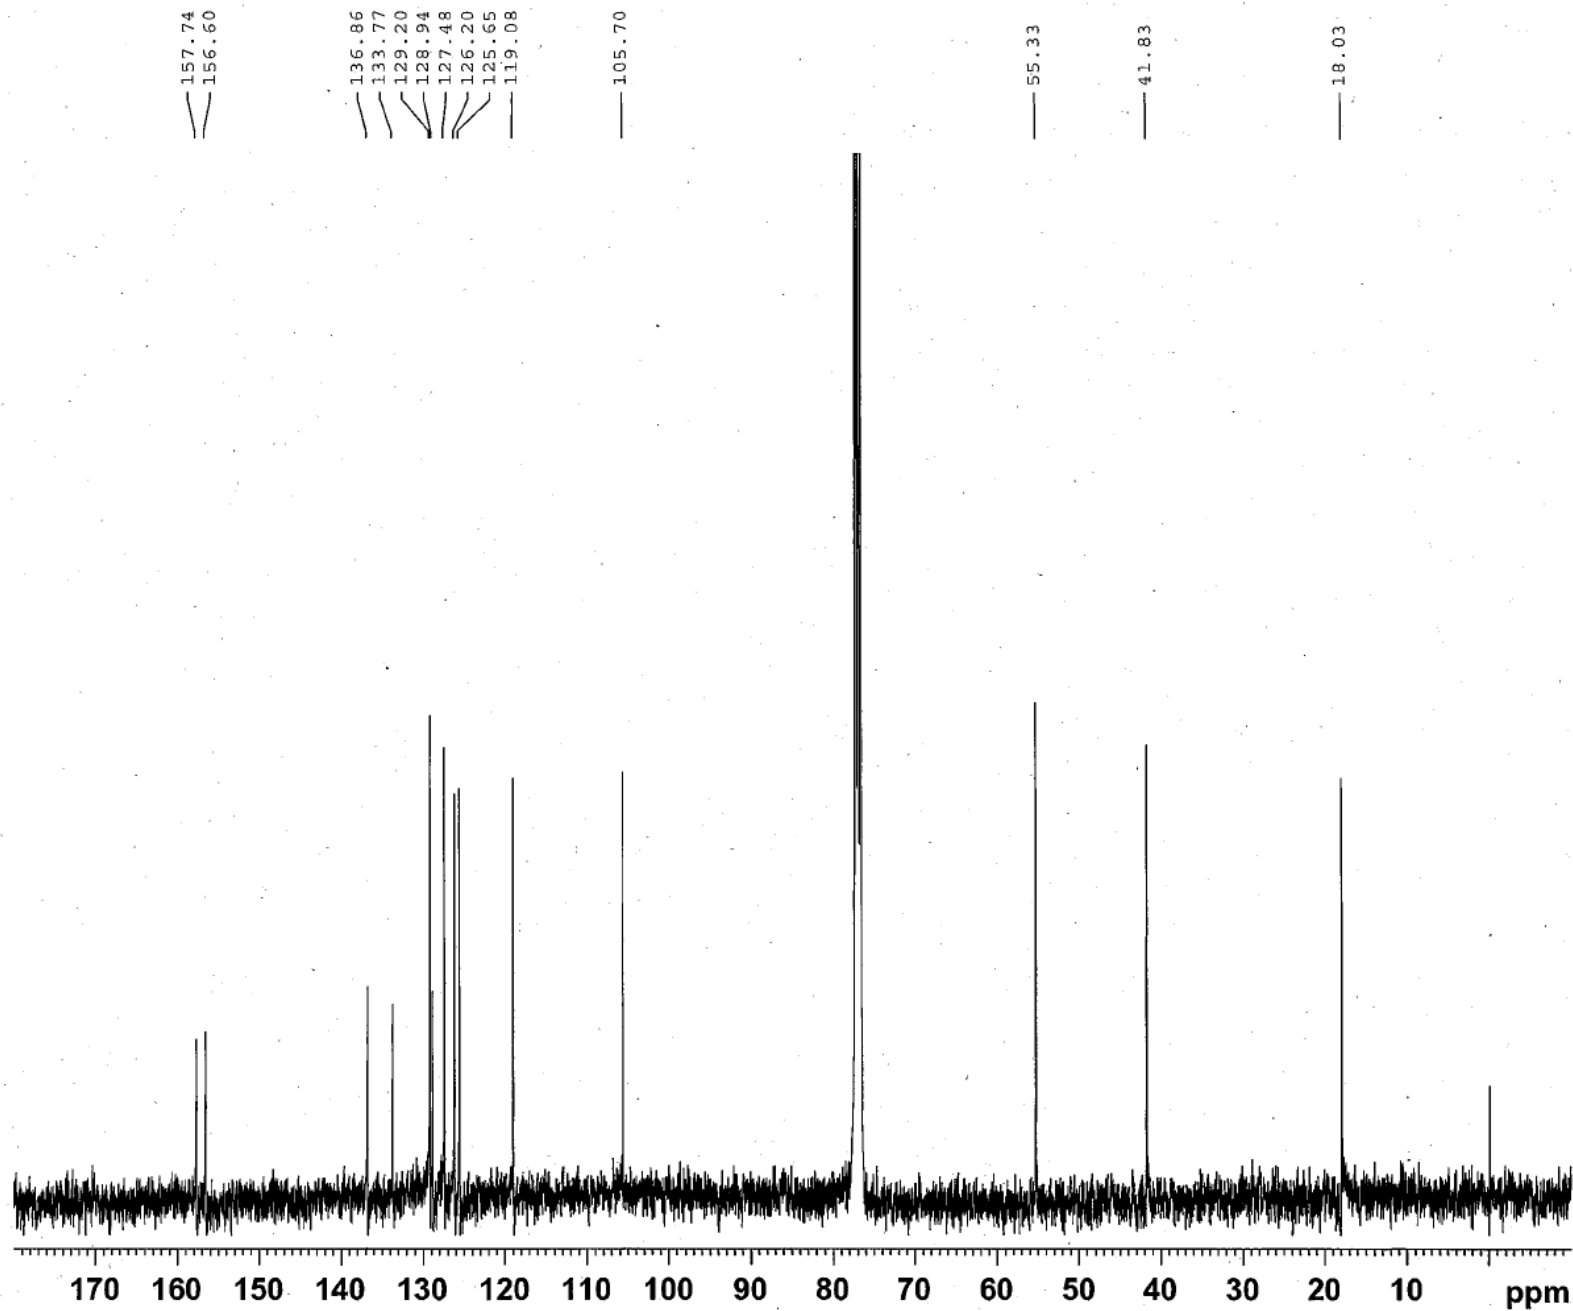

157.74  
156.60

136.86  
133.77  
129.20  
128.94  
127.48  
126.20  
125.65  
119.08

105.70

55.33

41.83

18.03

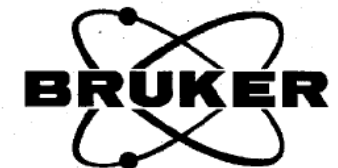

Current Data Parameters  
NAME A17mc219tf  
EXPNO 19012401  
PROCNO 1

F2 - Acquisition Parameters  
Date\_ 20190124  
Time 12.47  
INSTRUM spect  
PROBHD 5 mm CPQNP 1H/  
PULPROG zgpg30  
TD 65536  
SOLVENT CDCl3  
NS 256  
DS 2  
SWH 29761.904 Hz  
FIDRES 0.454131 Hz  
AQ 1.1010548 sec  
RG 110.67  
DW 16.800 usec  
DE 18.00 usec  
TE 300.0 K  
D1 2.00000000 sec  
D11 0.03000000 sec  
TD0 1

==== CHANNEL f1 =====  
NUC1 13C  
P1 12.00 usec  
PLW1 15.50000000 W  
SFO1 100.6248425 MHz

==== CHANNEL f2 =====  
CPDPRG2 waltz16  
NUC2 1H  
PCPD2 90.00 usec  
PLW2 5.19999981 W  
PLW12 0.14444000 W  
PLW13 0.11700000 W  
SFO2 400.1316005 MHz

F2 - Processing parameters  
SI 32768  
SF 100.6127690 MHz  
WDW EM  
SSB 0  
LB 2.00 Hz  
GB 0  
PC 1.40

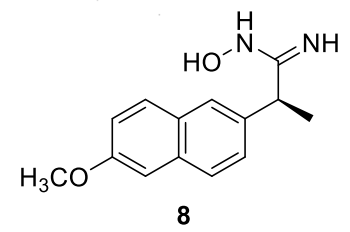

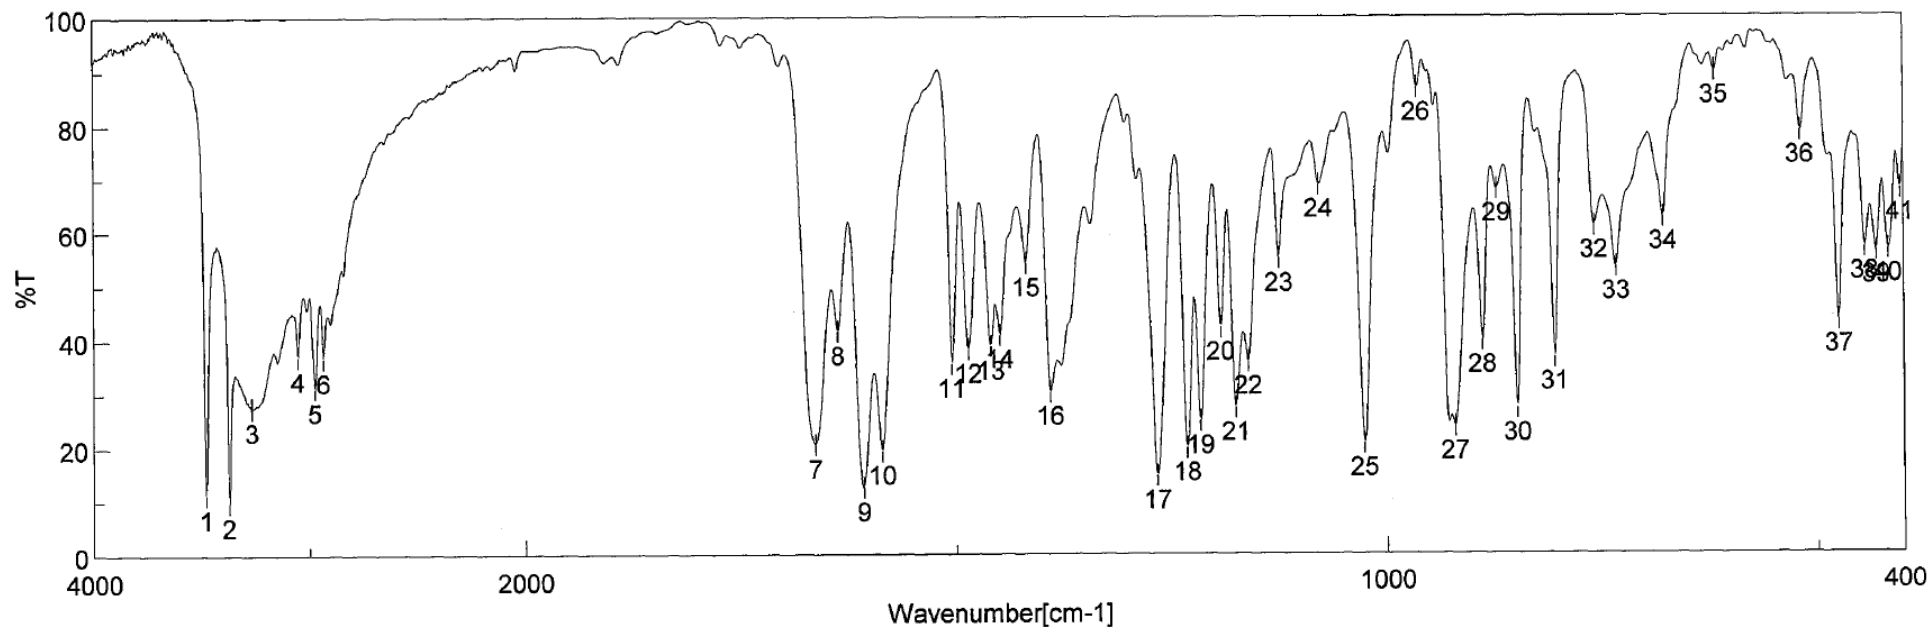

積算回数  
ゼロフィリング  
ゲイン  
測定日時  
測定者  
ファイル名  
サンプル名  
コメント

16  
ON  
16  
2018/01/11 10:33  
takase  
Memory#2  
N-OH naproxen amidine

分解  
アポダイゼーション  
スキャンスピード  
更新日時

4 cm-1  
Cosine  
2 mm/sec  
2018/01/11 10:34

|              |       |              |       |              |       |              |       |
|--------------|-------|--------------|-------|--------------|-------|--------------|-------|
| 1: 3478.95,  | 11.40 | 2: 3371.92,  | 9.84  | 3: 3267.79,  | 27.59 | 4: 3054.69,  | 37.06 |
| 5: 2975.62,  | 31.22 | 6: 2936.09,  | 36.78 | 7: 1663.30,  | 20.52 | 8: 1637.27,  | 41.71 |
| 9: 1607.38,  | 12.53 | 10: 1586.16, | 19.40 | 11: 1505.17, | 35.56 | 12: 1485.88, | 38.36 |
| 13: 1459.85, | 38.90 | 14: 1449.24, | 41.05 | 15: 1418.39, | 54.32 | 16: 1390.42, | 30.44 |
| 17: 1266.04, | 14.70 | 18: 1231.33, | 19.90 | 19: 1215.90, | 24.97 | 20: 1191.79, | 42.42 |
| 21: 1174.44, | 27.40 | 22: 1159.97, | 36.03 | 23: 1124.30, | 55.19 | 24: 1078.01, | 69.02 |
| 25: 1025.94, | 20.72 | 26: 964.23,  | 87.04 | 27: 920.84,  | 23.82 | 28: 889.02,  | 39.96 |
| 29: 871.67,  | 68.13 | 30: 848.53,  | 27.14 | 31: 805.13,  | 36.74 | 32: 758.85,  | 61.20 |
| 33: 733.78,  | 53.54 | 34: 678.82,  | 62.78 | 35: 619.04,  | 90.08 | 36: 519.72,  | 78.93 |
| 37: 475.37,  | 43.58 | 38: 445.48,  | 57.09 | 39: 431.98,  | 56.44 | 40: 418.48,  | 56.70 |

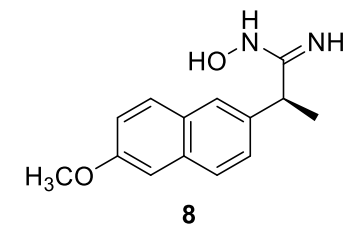

1H

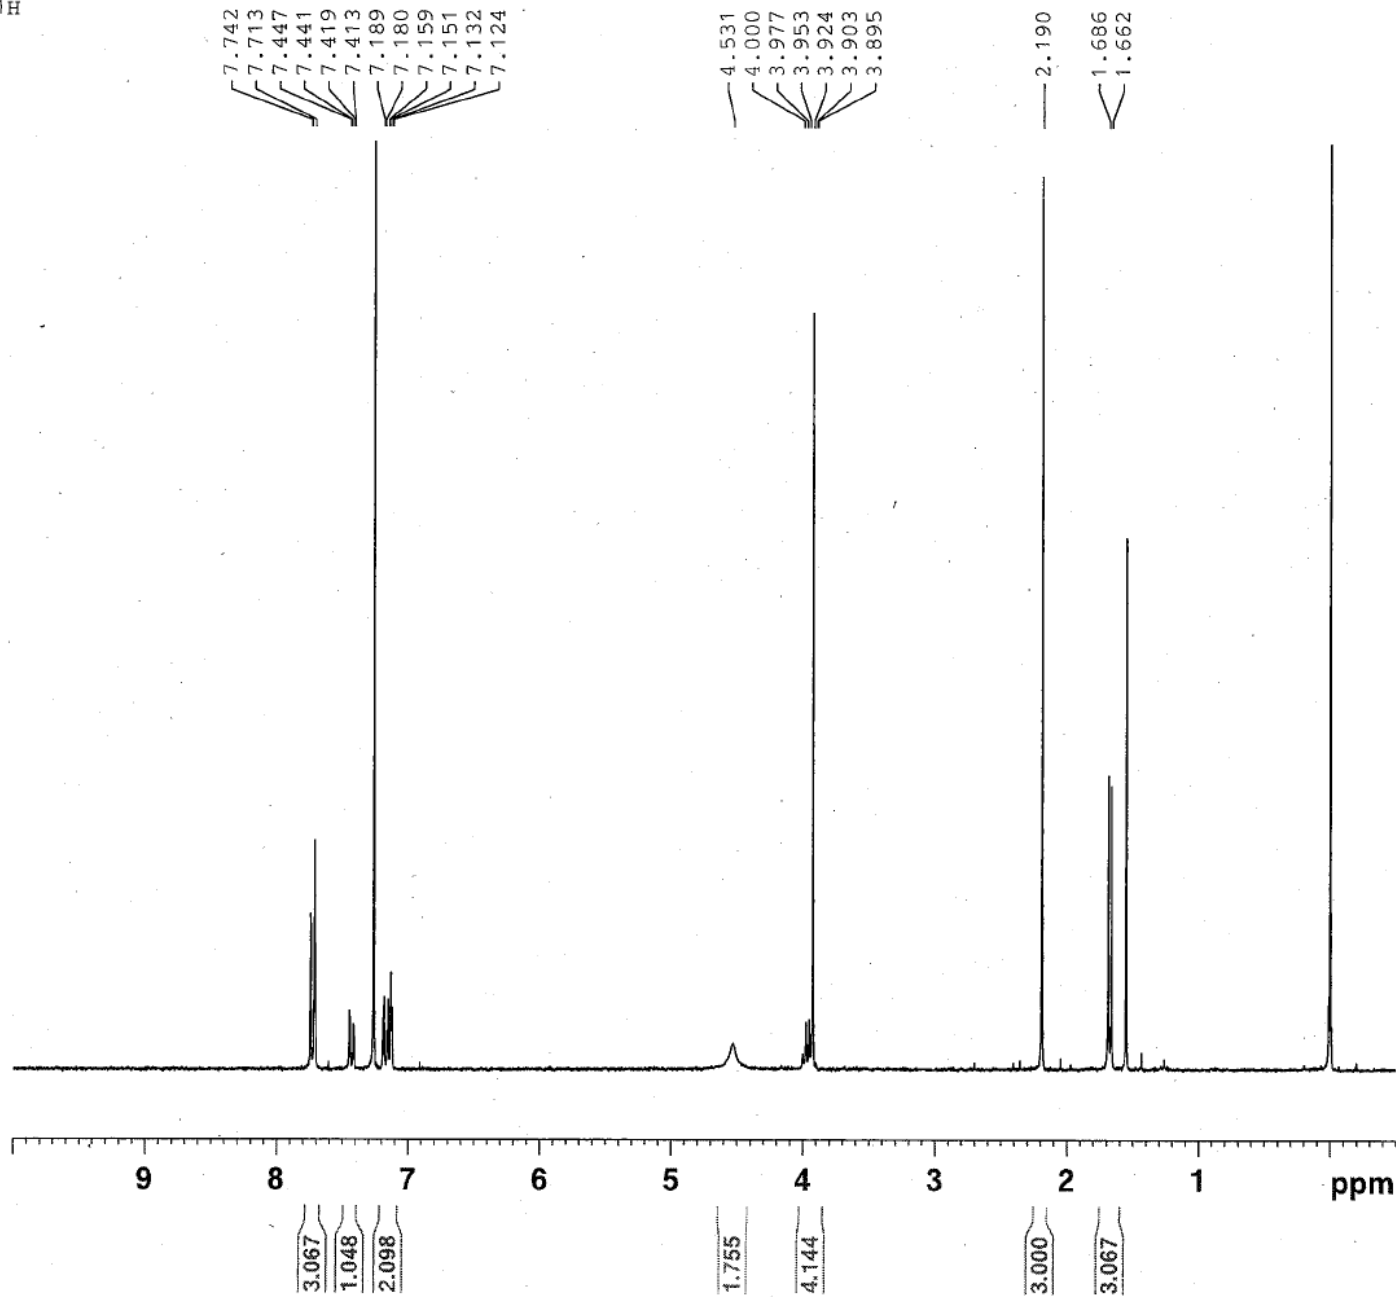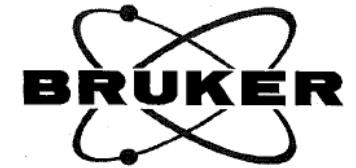

NAME A17mc219tf  
 EXPNO 18022701  
 PROCNO 1  
 Date\_ 20180227  
 Time 15.58  
 INSTRUM spect  
 PROBHD 5 mm PABBO BB-  
 PULPROG zg30  
 TD 65536  
 SOLVENT CDC13  
 NS 8  
 DS 2  
 SWH 6188.119 Hz  
 FIDRES 0.094423 Hz  
 AQ 5.2953587 sec  
 RG 203  
 DW 80.800 usec  
 DE 6.50 usec  
 TE 296.4 K  
 D1 1.00000000 sec  
 TD0 1

===== CHANNEL f1 =====  
 NUC1 1H  
 P1 15.00 usec  
 PL1 1.20 dB  
 PL1W 8.19348145 W  
 SFO1 300.1318534 MHz  
 SI 32768  
 SF 300.1300057 MHz  
 WDW EM  
 SSB 0  
 LB 0.30 Hz  
 GB 0  
 PC 1.00

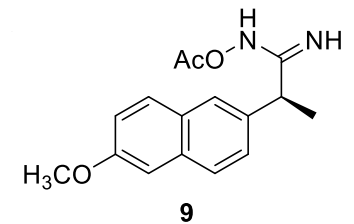

13C with dec. CPQNP

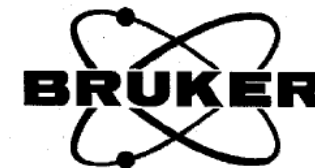

Current Data Parameters  
 NAME A17mc219tf  
 EXPNO 19020101  
 PROCNO 1

F2 - Acquisition Parameters  
 Date\_ 20190201  
 Time\_ 13.09  
 INSTRUM spect  
 PROBHD 5 mm CPQNP 1H/  
 PULPROG zgpg30  
 TD 65536  
 SOLVENT CDCl3  
 NS 186  
 DS 2  
 SWH 29761.904 Hz  
 FIDRES 0.454131 Hz  
 AQ 1.1010548 sec  
 RG 126.99  
 DW 16.800 usec  
 DE 18.00 usec  
 TE 300.0 K  
 D1 2.00000000 sec  
 D11 0.03000000 sec  
 TDO 1

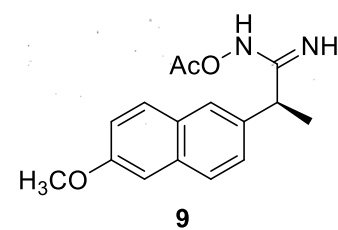

==== CHANNEL f1 =====  
 NUC1 13C  
 P1 12.00 usec  
 PLW1 15.5000000 W  
 SFO1 100.6248425 MHz

==== CHANNEL f2 =====  
 CPDPRG2 waltz16  
 NUC2 1H  
 PCPD2 90.00 usec  
 PLW2 5.19999981 W  
 PLW12 0.14444000 W  
 PLW13 0.11700000 W  
 SFO2 400.1316005 MHz

F2 - Processing parameters  
 SI 32768  
 SF 100.6127682 MHz  
 WDW EM  
 SSB 0  
 LB 2.00 Hz  
 GB 0  
 PC 1.40

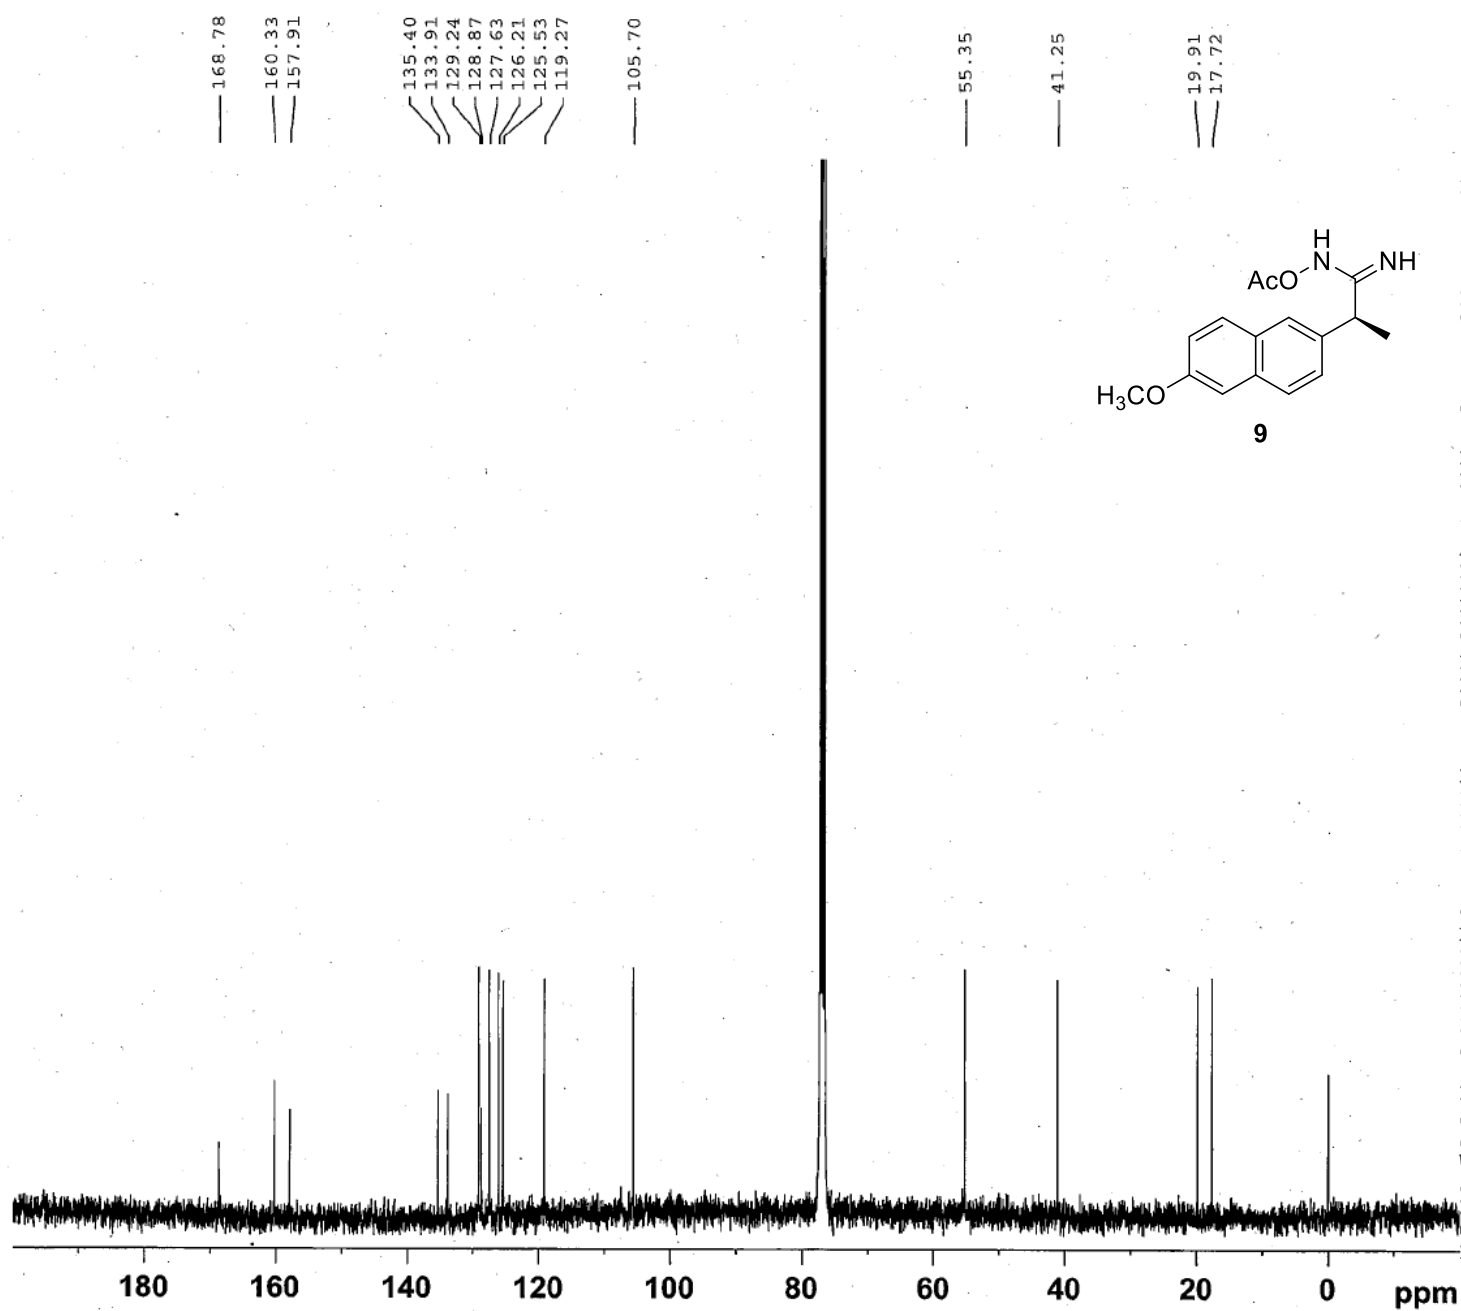

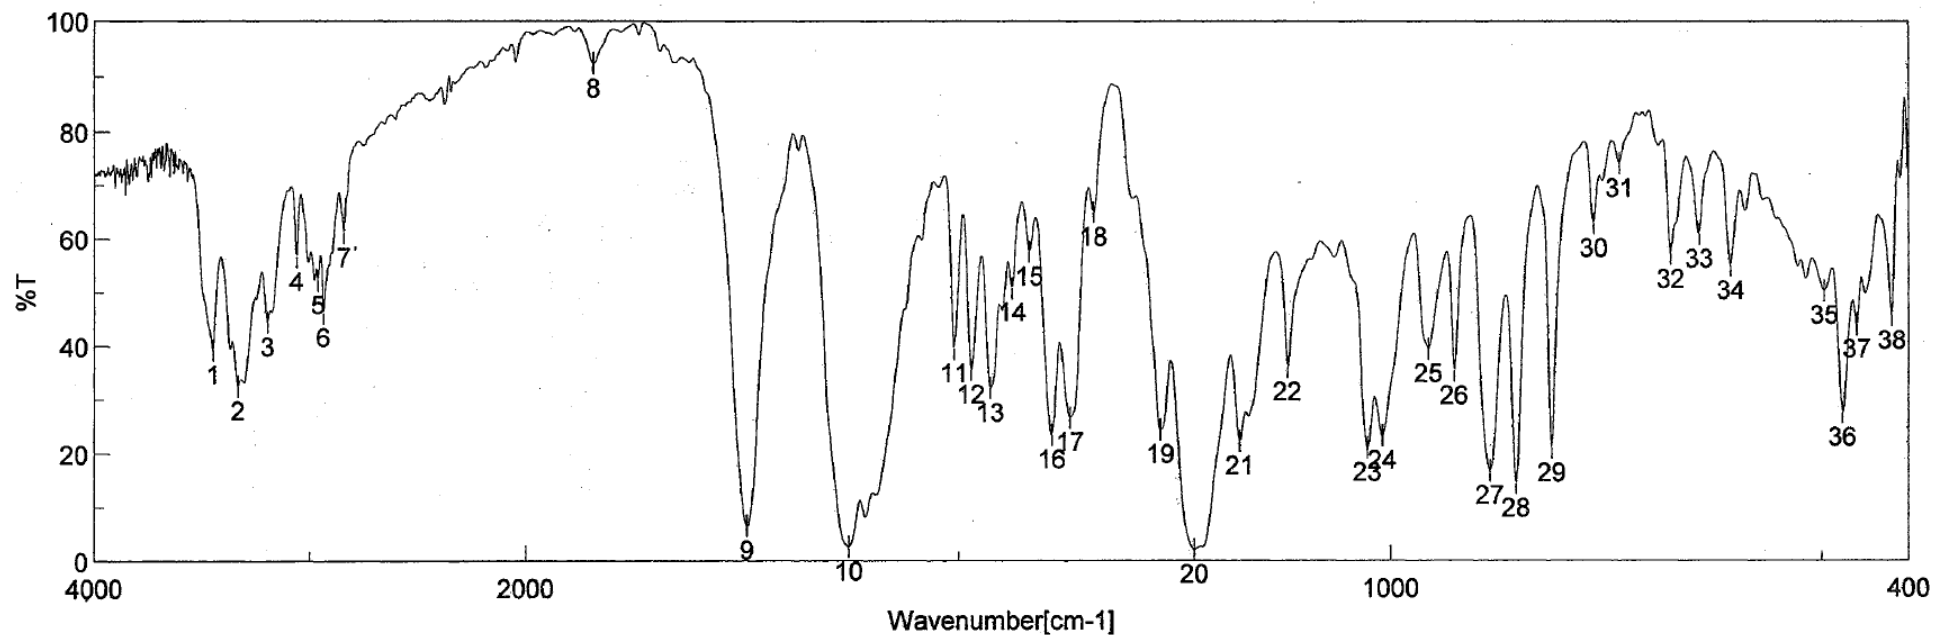

積算回数  
ゼロフィリング  
ゲイン  
測定日時  
測定者  
ファイル名  
サンプル名  
コメント

8  
ON  
16  
2019/01/26 14:14  
takase  
Memory#2  
88, (S)-N-AcO-2-(6-methoxy-2-naphthyl)propionamide

分解  
アボダイゼーション  
スキャンスピード  
更新日時

4 cm-1  
Cosine  
2 mm/sec  
2019/01/26 14:15

|              |       |              |       |              |       |              |       |
|--------------|-------|--------------|-------|--------------|-------|--------------|-------|
| 1: 3449.06,  | 39.29 | 2: 3332.39,  | 32.57 | 3: 3196.43,  | 44.47 | 4: 3060.48,  | 56.69 |
| 5: 2962.13,  | 52.31 | 6: 2936.09,  | 46.22 | 7: 2841.60,  | 61.19 | 8: 1921.72,  | 92.47 |
| 9: 1744.30,  | 6.59  | 10: 1626.66, | 2.69  | 11: 1505.17, | 39.61 | 12: 1485.88, | 35.63 |
| 13: 1463.71, | 32.22 | 14: 1438.64, | 50.95 | 15: 1418.39, | 57.71 | 16: 1392.35, | 23.48 |
| 17: 1371.14, | 26.73 | 18: 1344.14, | 65.00 | 19: 1266.04, | 24.50 | 20: 1226.51, | 2.12  |
| 21: 1173.47, | 22.32 | 22: 1118.51, | 36.18 | 23: 1026.91, | 21.13 | 24: 1009.55, | 23.39 |
| 25: 956.52,  | 39.60 | 26: 926.63,  | 35.48 | 27: 885.17,  | 16.85 | 28: 855.28,  | 14.44 |
| 29: 813.81,  | 21.00 | 30: 765.60,  | 62.91 | 31: 735.71,  | 74.10 | 32: 675.93,  | 57.24 |
| 33: 643.14,  | 60.92 | 34: 606.50,  | 55.16 | 35: 497.54,  | 50.48 | 36: 476.33,  | 27.67 |
| 37: 459.94,  | 44.15 | 38: 419.44,  | 45.77 |              |       |              |       |

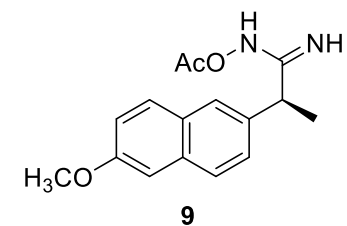

<sup>1</sup>H

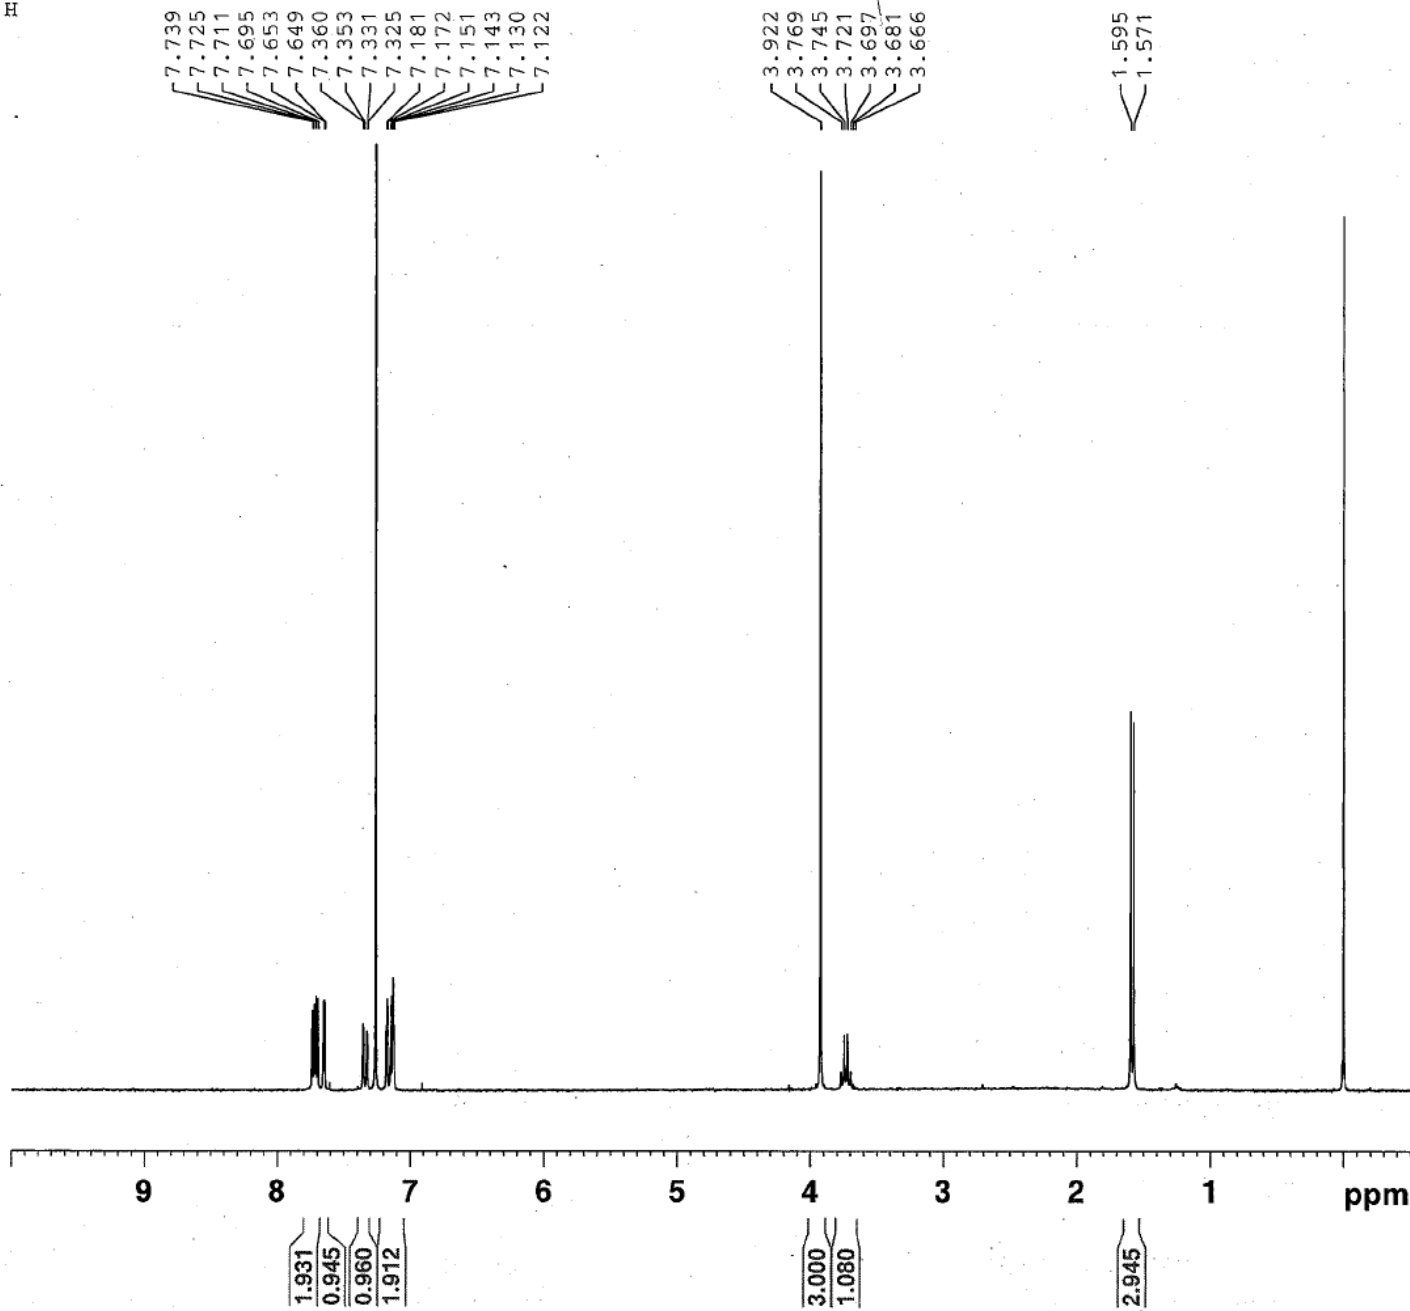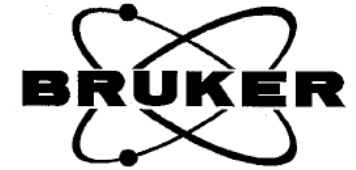

NAME A17mc219tf  
 EXPNO 18062701  
 PROCNO 1  
 Date\_ 20180627  
 Time 10.31  
 INSTRUM spect  
 PROBHD 5 mm PABBO BB-  
 PULPROG zg30  
 TD 65536  
 SOLVENT CDCl3  
 NS 8  
 DS 2  
 SWH 6188.119 Hz  
 FIDRES 0.094423 Hz  
 AQ 5.2953587 sec  
 RG 203  
 DW 80.800 usec  
 DE 6.50 usec  
 TE 296.6 K  
 D1 1.00000000 sec  
 TD0 1

==== CHANNEL f1 =====  
 NUC1 <sup>1</sup>H  
 P1 15.00 usec  
 PL1 1.20 dB  
 PL1W 8.19348145 W  
 SFO1 300.1318534 MHz  
 SI 32768  
 SF 300.1300058 MHz  
 WDW EM  
 SSB 0  
 LB 0.30 Hz  
 GB 0  
 PC 1.00

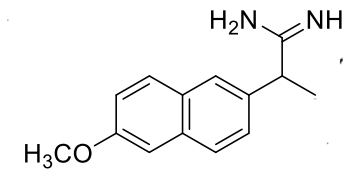

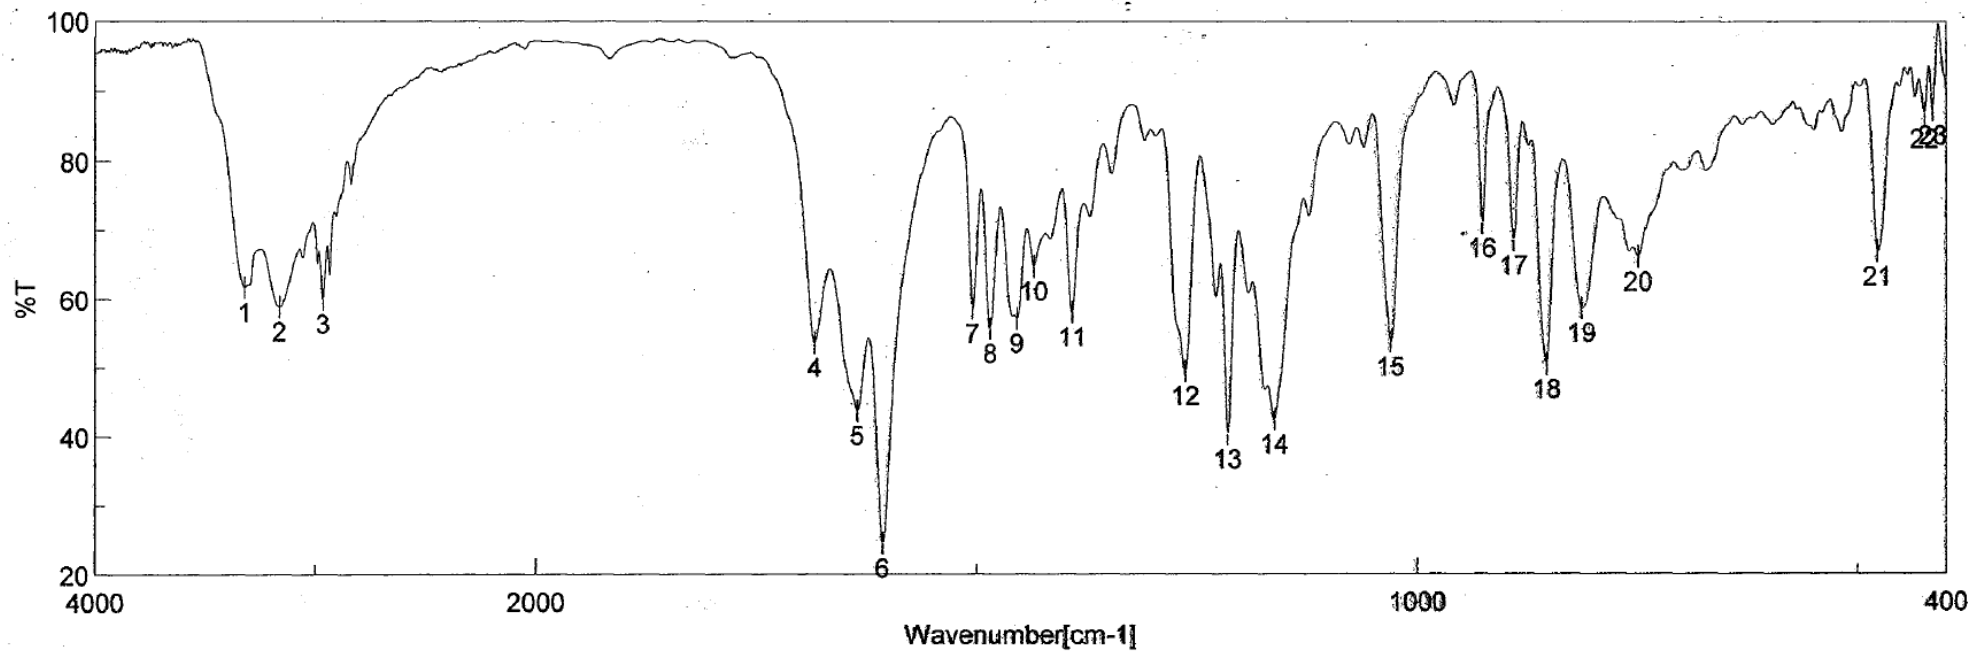

積算回数  
ゼロフィリング  
ゲイン  
測定日時  
測定者  
ファイル名  
サンプル名  
コメント

16  
ON  
8  
2018/03/02 16:17  
takase  
Memory#2  
S-naproxene amidine

分解  
アポダイゼーション  
スキャンスピード  
更新日時

4 cm-1  
Cosine  
2 mm/sec  
2018/03/02 16:18

|     |          |       |     |          |       |     |          |       |     |          |       |
|-----|----------|-------|-----|----------|-------|-----|----------|-------|-----|----------|-------|
| 1:  | 3320.82, | 61.77 | 2:  | 3162.69, | 58.97 | 3:  | 2965.98, | 60.08 | 4:  | 1683.55, | 53.69 |
| 5:  | 1635.34, | 43.79 | 6:  | 1606.41, | 24.50 | 7:  | 1505.17, | 58.68 | 8:  | 1484.92, | 55.76 |
| 9:  | 1455.03, | 57.26 | 10: | 1435.74, | 64.91 | 11: | 1392.35, | 58.17 | 12: | 1264.11, | 49.56 |
| 13: | 1215.90, | 40.32 | 14: | 1162.87, | 42.54 | 15: | 1030.77, | 53.83 | 16: | 926.63,  | 71.15 |
| 17: | 890.95,  | 68.67 | 18: | 853.35,  | 50.61 | 19: | 813.81,  | 58.81 | 20: | 750.17,  | 66.30 |
| 21: | 478.26,  | 67.08 | 22: | 425.23,  | 86.87 | 23: | 415.58,  | 87.36 |     |          |       |

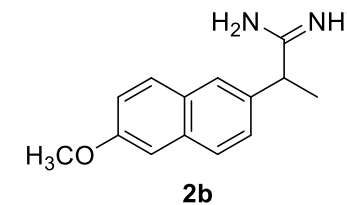





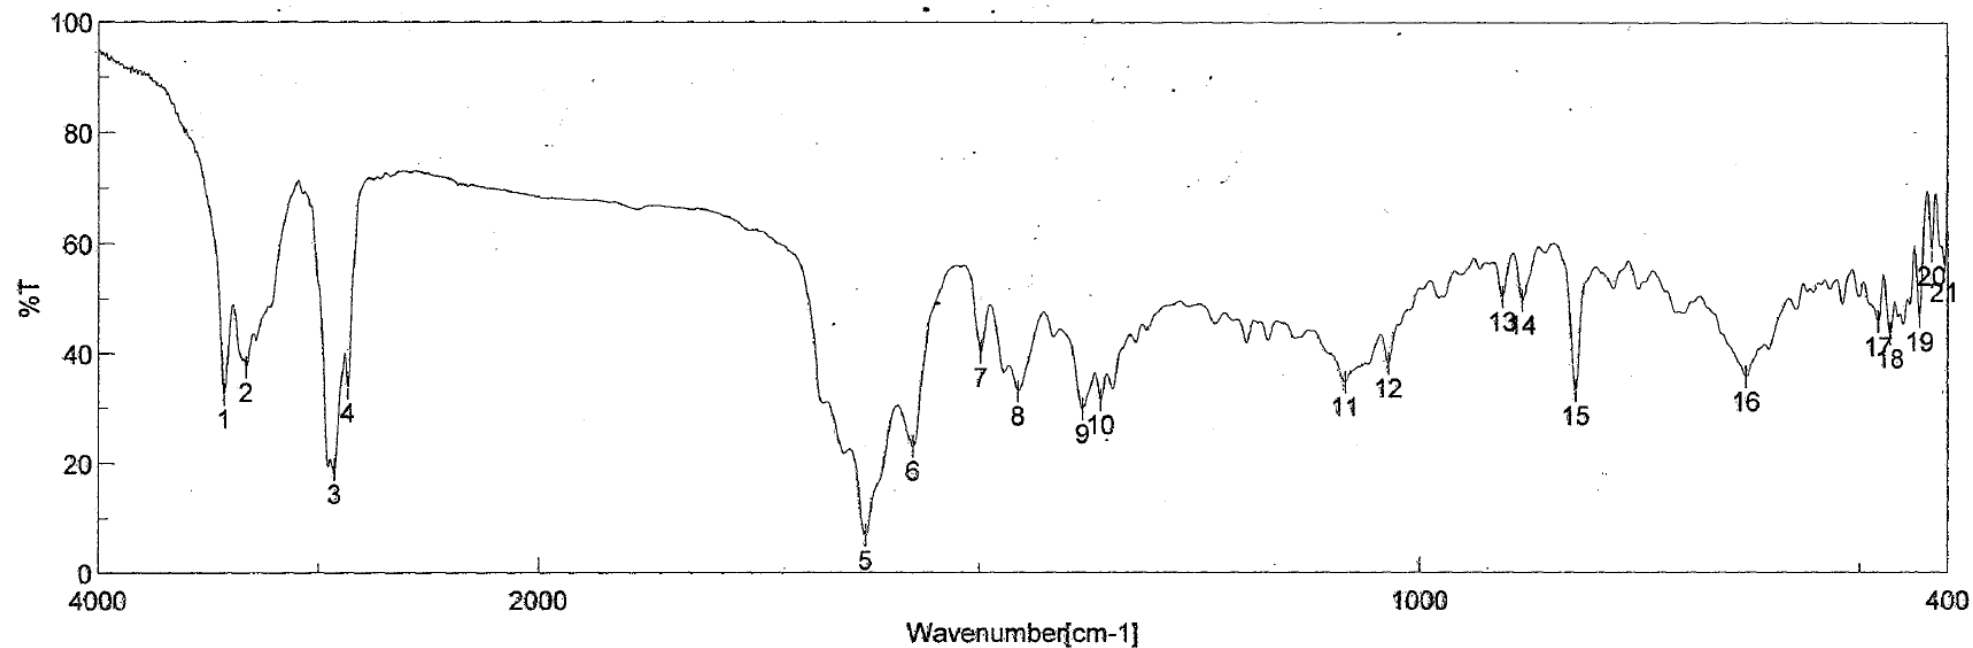

積算回数 4  
 ゼロフィリング ON  
 ゲイン 16  
 測定日時 2018/05/30 15:34  
 測定者 takase  
 ファイル名 Memory#2  
 サンプル名 dehydroabietyl amide  
 コメント

分解 4 cm-1  
 アポダイゼーション Cosine  
 スキャンスピード 2 mm/sec  
 更新日時 2018/05/30 15:36

|     |          |       |     |          |       |     |          |       |     |          |       |
|-----|----------|-------|-----|----------|-------|-----|----------|-------|-----|----------|-------|
| 1:  | 3427.85, | 32.57 | 2:  | 3327.57, | 37.42 | 3:  | 2927.41, | 18.90 | 4:  | 2866.67, | 33.75 |
| 5:  | 1628.59, | 6.87  | 6:  | 1574.59, | 23.09 | 7:  | 1498.42, | 40.22 | 8:  | 1455.99, | 33.12 |
| 9:  | 1382.71, | 29.90 | 10: | 1362.46, | 31.52 | 11: | 1084.76, | 34.84 | 12: | 1035.59, | 38.23 |
| 13: | 905.42,  | 50.49 | 14: | 883.24,  | 49.87 | 15: | 822.49,  | 33.23 | 16: | 629.64,  | 35.83 |
| 17: | 479.22,  | 45.96 | 18: | 465.72,  | 43.75 | 19: | 431.98,  | 46.85 | 20: | 418.48,  | 58.79 |
| 21: | 404.01,  | 55.86 |     |          |       |     |          |       |     |          |       |

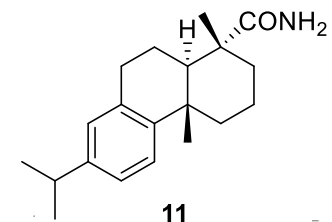

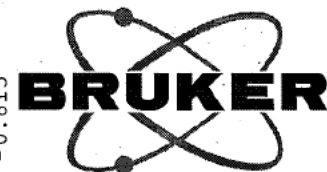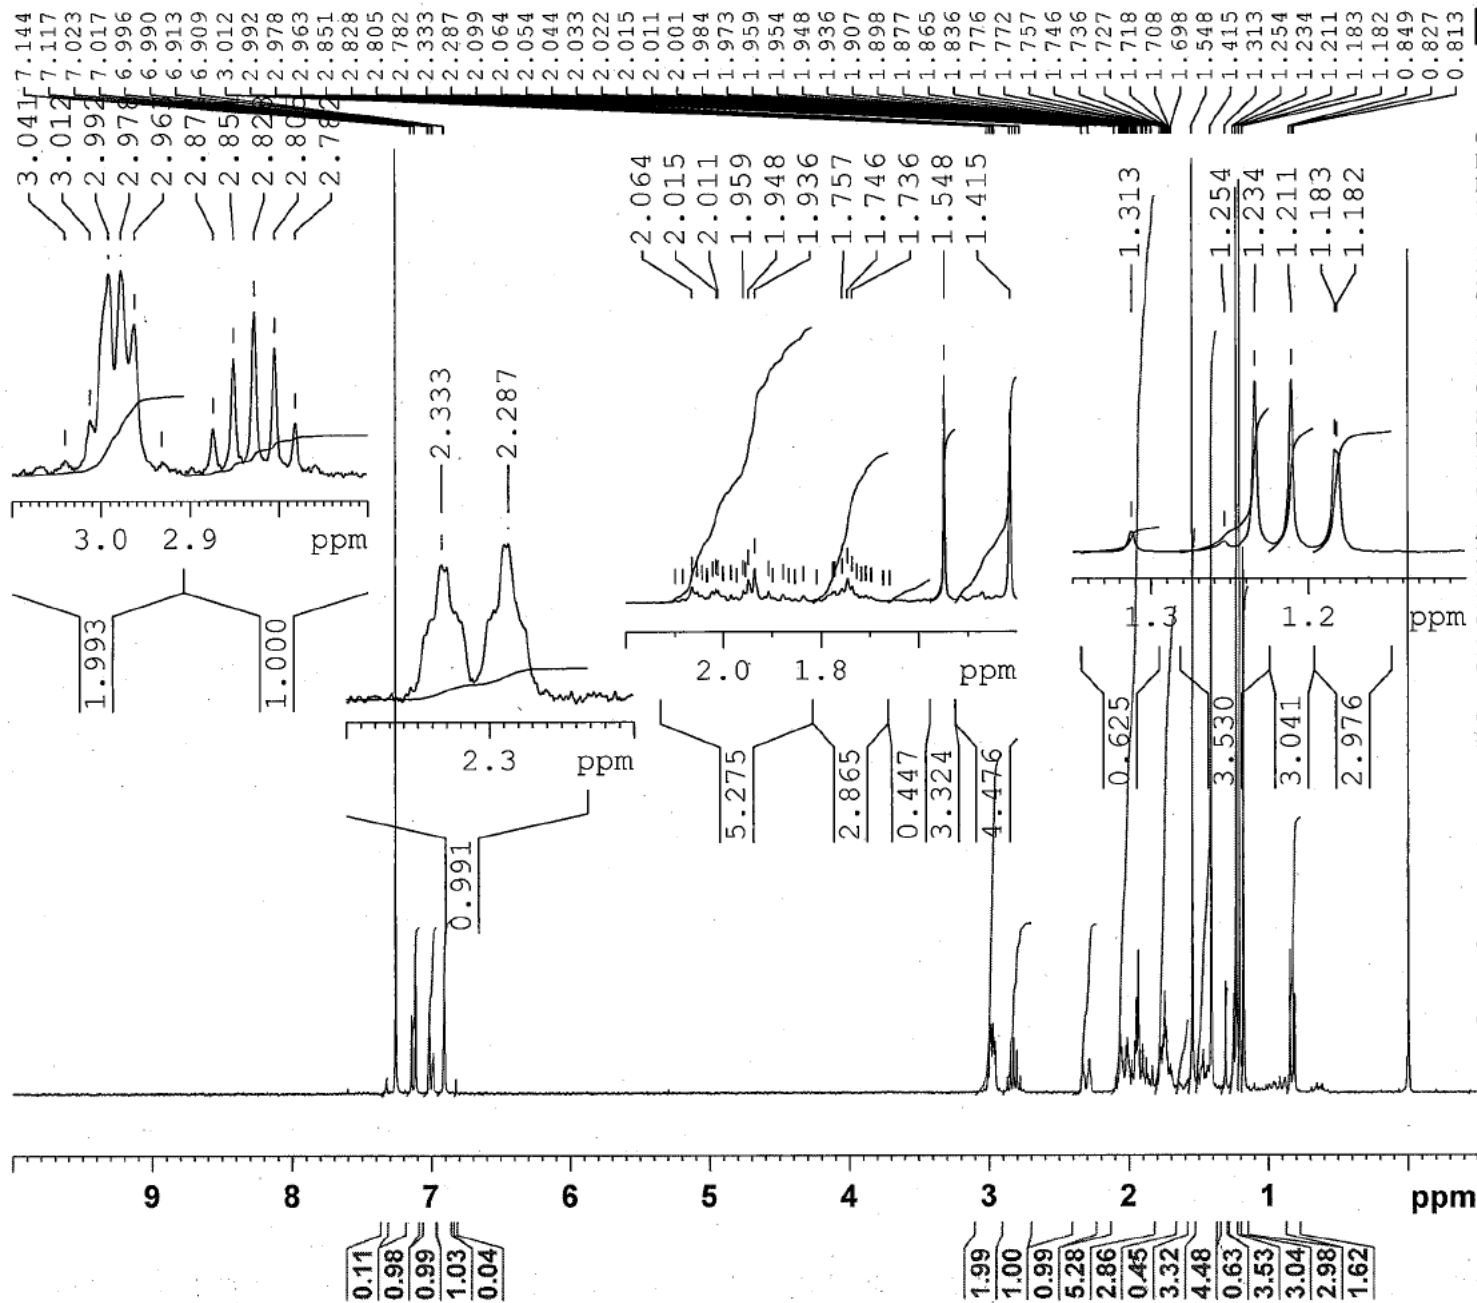

Current Data Parameters  
 NAME A17mc219tf  
 EXPNO 18053001  
 PROCNO 1

F2 - Acquisition Parameters  
 Date 20180530  
 Time 14.40  
 INSTRUM spect  
 PROBHD 5 mm PABBO BB-  
 PULPROG zg30  
 TD 65536  
 SOLVENT CDCl3  
 NS 8  
 DS 2  
 SWH 6188.119 Hz  
 FIDRES 0.094423 Hz  
 AQ 5.2953587 sec  
 RG 203  
 DW 80.800 usec  
 DE 6.50 usec  
 TE 296.6 K  
 D1 1.00000000 sec  
 TD0 1

----- CHANNEL f1 -----  
 NUC1 1H  
 P1 15.00 usec  
 PL1 1.20 dB  
 PL1W 8.19348145 W  
 SFO1 300.1318534 MHz

F2 - Processing parameters  
 SI 32768  
 SF 300.1300061 MHz  
 WDW EM  
 SSB 0  
 LB 0.30 Hz  
 GB 0  
 PC 1.00

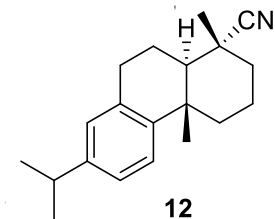

13C with dec. CPQNP

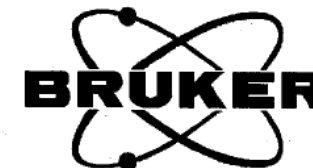

Current Data Parameters  
NAME A17mc219tf  
EXPNO 19010701  
PROCNO 1

F2 - Acquisition Parameters  
Date\_ 20190107  
Time 13.23  
INSTRUM spect  
PROBHD 5 mm CPQNP 1H/  
PULPROG zgpg30  
TD 65536  
SOLVENT CDCl3  
NS 64  
DS 2  
SWH 29761.904 Hz  
FIDRES 0.454131 Hz  
AQ 1.1010548 sec  
RG 126.99  
DW 16.800 usec  
DE 18.00 usec  
TE 300.0 K  
D1 2.0000000 sec  
D11 0.03000000 sec  
TDO 1

===== CHANNEL f1 =====  
NUC1 13C  
P1 12.00 usec  
PLW1 15.5000000 W  
SFO1 100.6248425 MHz

===== CHANNEL f2 =====  
CPDPRG2 waltz16  
NUC2 1H  
PCPD2 90.00 usec  
PLW2 5.19999981 W  
PLW12 0.14444000 W  
PLW13 0.11700000 W  
SFO2 400.1316005 MHz

F2 - Processing parameters  
SI 32768  
SF 100.6127690 MHz  
WDW EM  
SSB 0  
LB 2.00 Hz  
GB 0  
PC 1.40

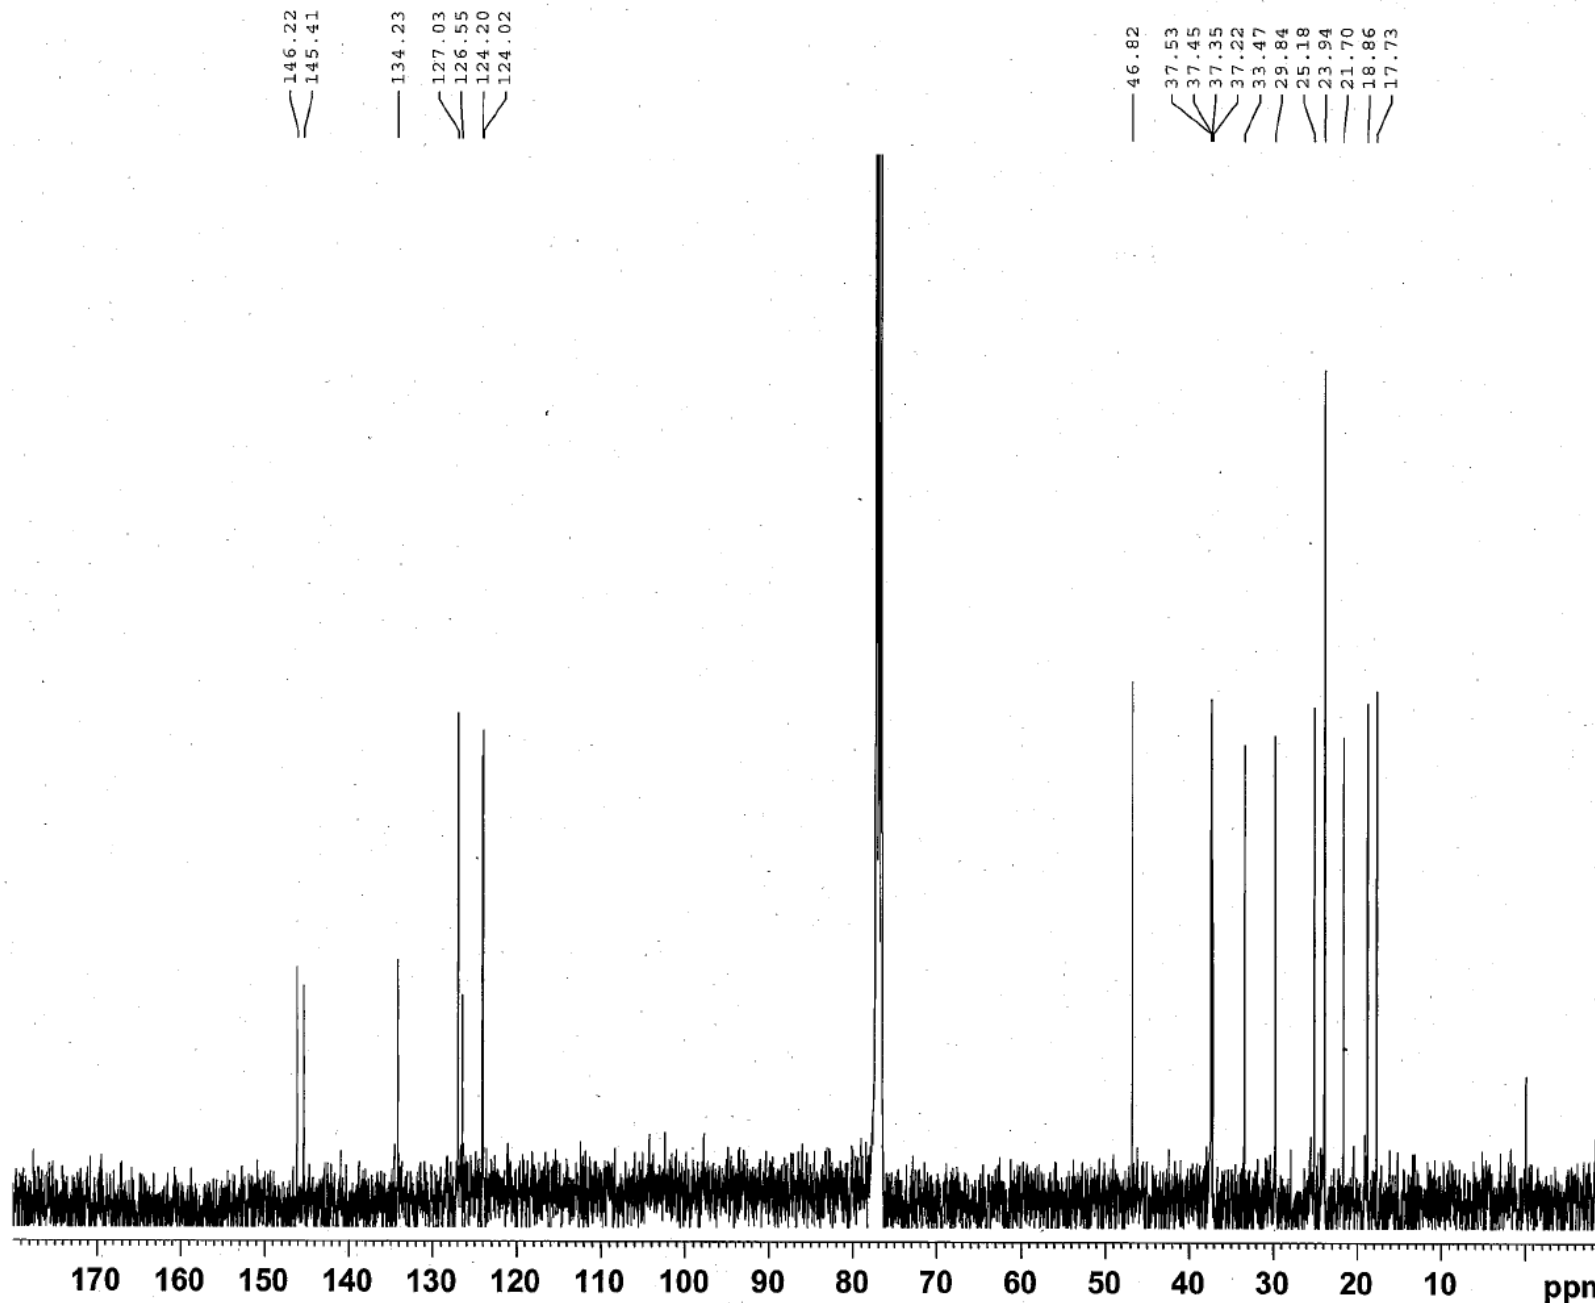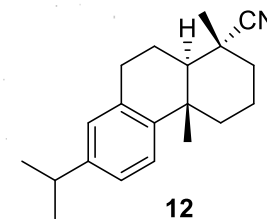

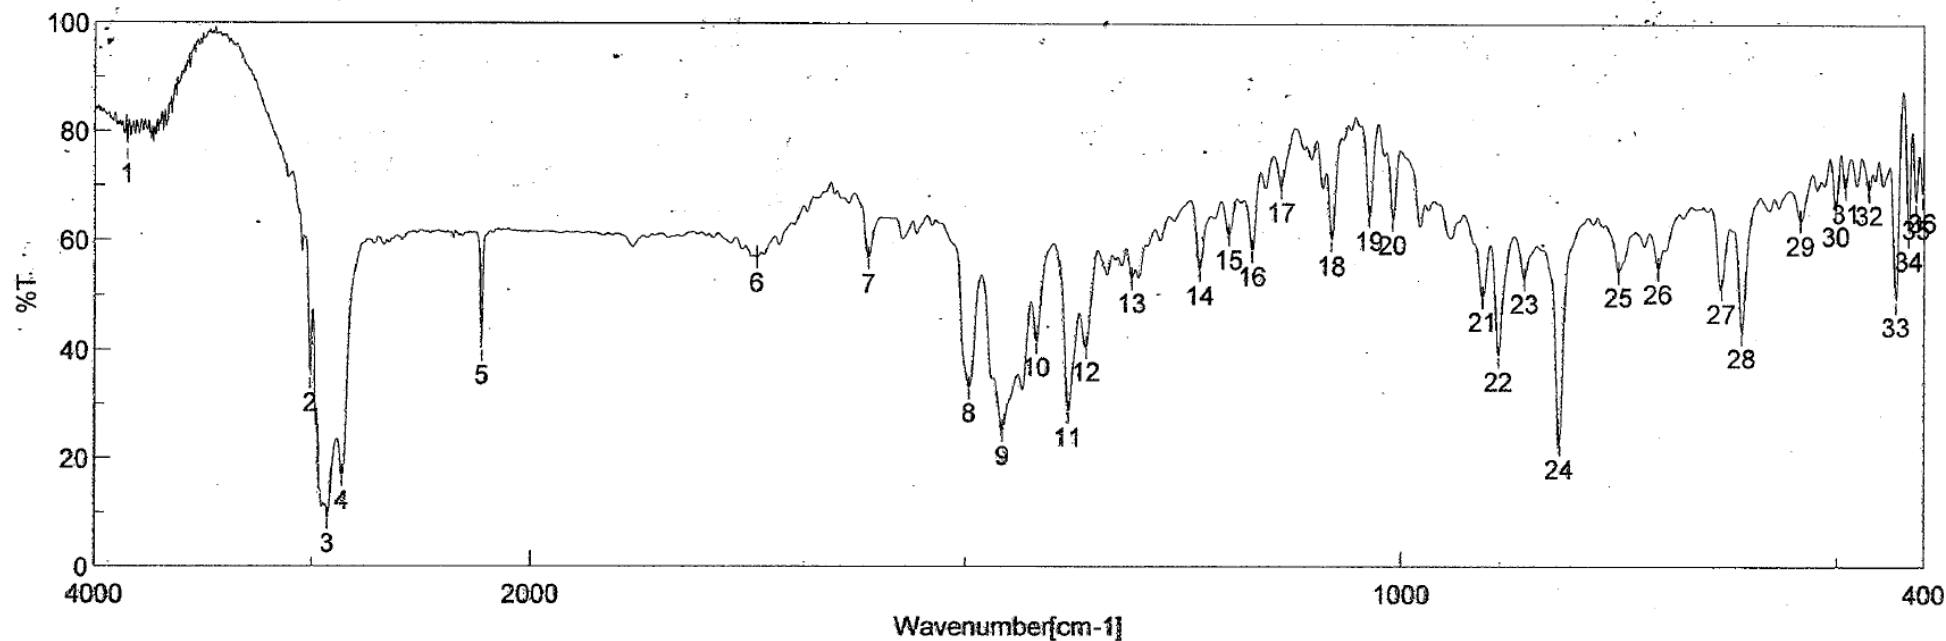

積算回数  
ゼロフィリング  
ゲイン  
測定日時  
測定者  
ファイル名  
サンプル名  
コメント

4  
ON  
16  
2018/05/30 15:52  
takase  
Memory#2  
dehydroabietyl cyanide

分解  
アポダイゼーション  
スキャンスピード  
更新日時

4 cm-1  
Cosine  
2 mm/sec  
2018/05/30 15:53

|              |       |              |       |              |       |              |       |
|--------------|-------|--------------|-------|--------------|-------|--------------|-------|
| 1: 3852.11,  | 76.68 | 2: 3010.34,  | 34.85 | 3: 2930.31,  | 8.90  | 4: 2862.81,  | 16.85 |
| 5: 2225.45,  | 39.91 | 6: 1740.44,  | 57.05 | 7: 1612.20,  | 56.90 | 8: 1496.49,  | 33.05 |
| 9: 1457.92,  | 25.15 | 10: 1419.35, | 41.52 | 11: 1382.71, | 28.58 | 12: 1362.46, | 40.65 |
| 13: 1310.39, | 53.31 | 14: 1232.29, | 54.80 | 15: 1199.51, | 61.21 | 16: 1172.51, | 58.29 |
| 17: 1138.76, | 69.87 | 18: 1080.91, | 60.19 | 19: 1037.52, | 64.63 | 20: 1010.52, | 63.93 |
| 21: 907.34,  | 49.97 | 22: 889.02,  | 38.90 | 23: 859.13,  | 53.28 | 24: 818.63,  | 22.68 |
| 25: 751.14,  | 54.49 | 26: 705.82,  | 55.16 | 27: 633.50,  | 51.46 | 28: 610.36,  | 43.25 |
| 29: 542.86,  | 63.87 | 30: 502.37,  | 65.65 | 31: 490.79,  | 69.82 | 32: 463.80,  | 69.45 |
| 33: 432.94,  | 49.12 | 34: 418.48,  | 61.19 | 35: 409.80,  | 66.92 | 36: 402.09,  | 68.15 |

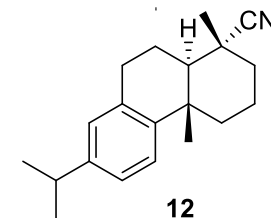

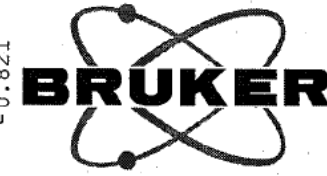

1H

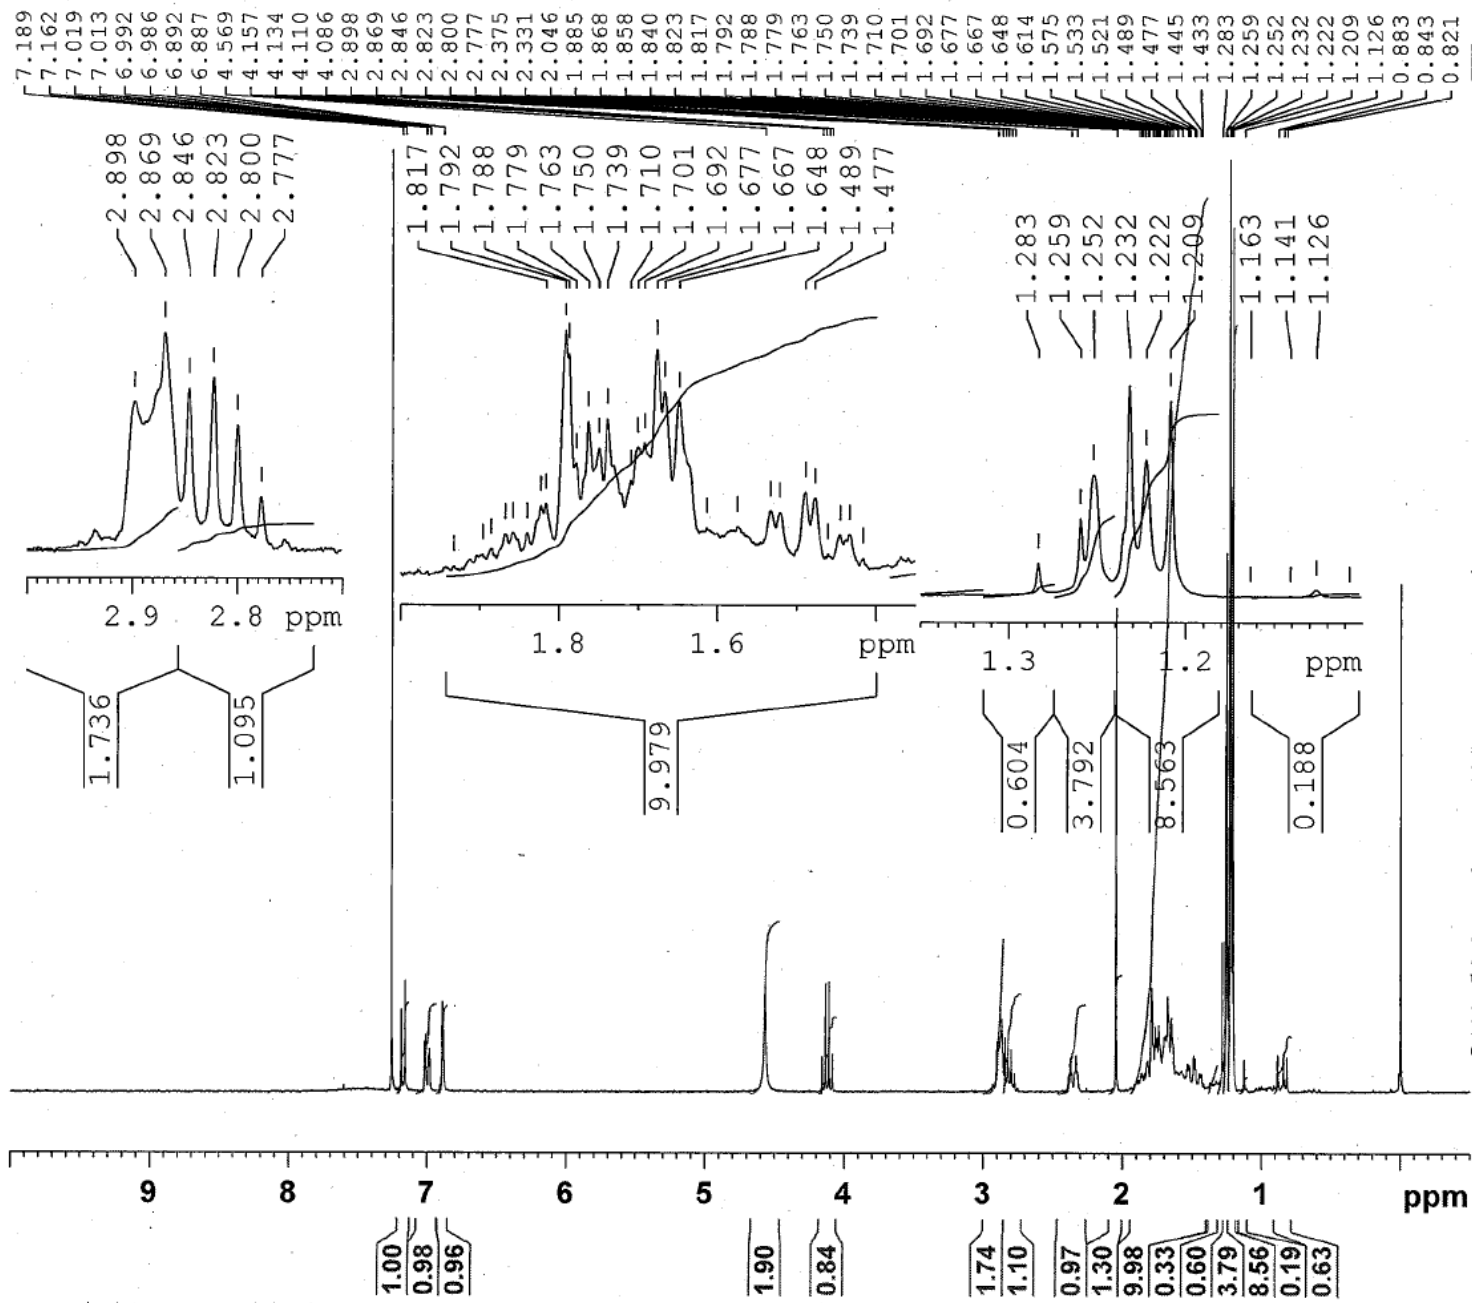

Current Data Parameters  
NAME A17mc219tf  
EXPNO 18060702  
PROCNO 1

F2 - Acquisition Parameters  
Date\_ 20180607  
Time\_ 18.57  
INSTRUM spect  
PROBHD 5 mm PABBO BB-  
PULPROG zg30  
TD 65536  
SOLVENT CDCl3  
NS 8  
DS 2  
SWH 6188.119 Hz  
FIDRES 0.094423 Hz  
AQ 5.2953587 sec  
RG 203  
DW 80.800 usec  
DE 6.50 usec  
TE 296.6 K  
D1 1.0000000 sec  
TD0 1

==== CHANNEL f1 =====  
NUC1 1H  
P1 15.00 usec  
PL1 1.20 dB  
PL1W 8.19348145 W  
SF01 300.1318534 MHz

F2 - Processing parameters  
SI 32768  
SF 300.1300061 MHz  
WDW EM  
SSB 0  
LB 0.30 Hz  
GB 0  
PC 1.00

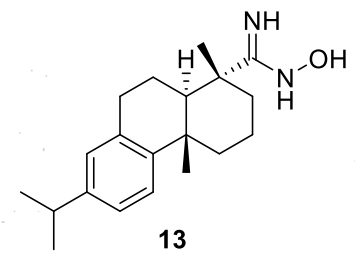

<sup>13</sup>C with dec. CPQNP

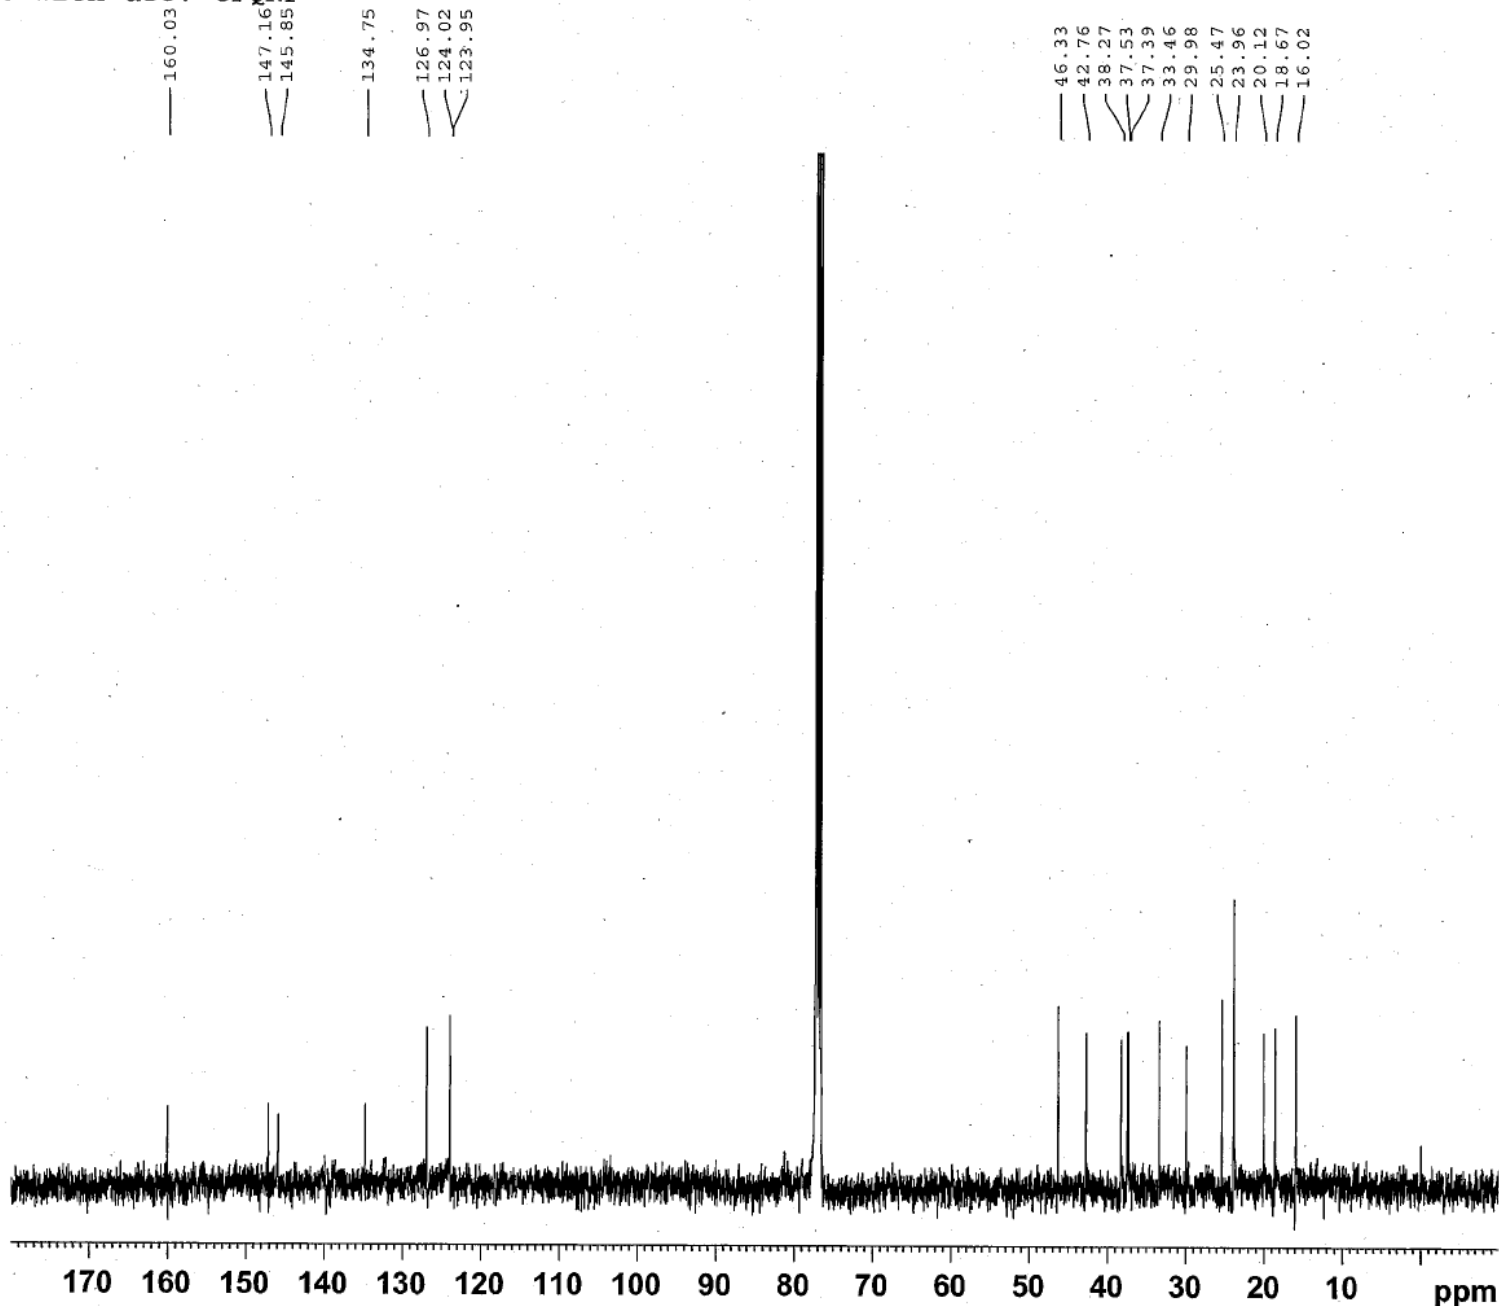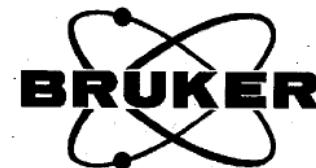

Current Data Parameters  
NAME A17mc219tf  
EXPNO 19010801  
PROCNO 1

F2 - Acquisition Parameters  
Date\_ 20190109  
Time 10.06  
INSTRUM spect  
PROBHD 5 mm CPQNP 1H/  
PULPROG zgpg30  
TD 65536  
SOLVENT CDC13  
NS 64  
DS 2  
SWH 29761.904 Hz  
FIDRES 0.454131 Hz  
AQ 1.1010548 sec  
RG 91.75  
DW 16.800 usec  
DE 18.00 usec  
TE 300.0 K  
D1 2.00000000 sec  
D11 0.03000000 sec  
TD0 1

==== CHANNEL f1 =====  
NUC1 13C  
P1 12.00 usec  
PLW1 15.50000000 W  
SFO1 100.6248425 MHz

==== CHANNEL f2 =====  
CPDPRG2 waltz16  
NUC2 1H  
PCPD2 90.00 usec  
PLW2 5.19999981 W  
PLW12 0.14444000 W  
PLW13 0.11700000 W  
SFO2 400.1316005 MHz

F2 - Processing parameters  
SI 32768  
SF 100.6127690 MHz  
WDW EM  
SSB 0  
LB 2.00 Hz  
GB 0  
PC 1.40

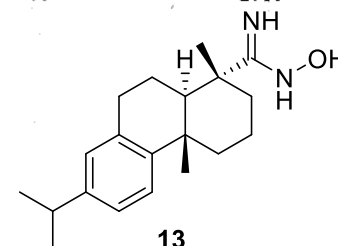

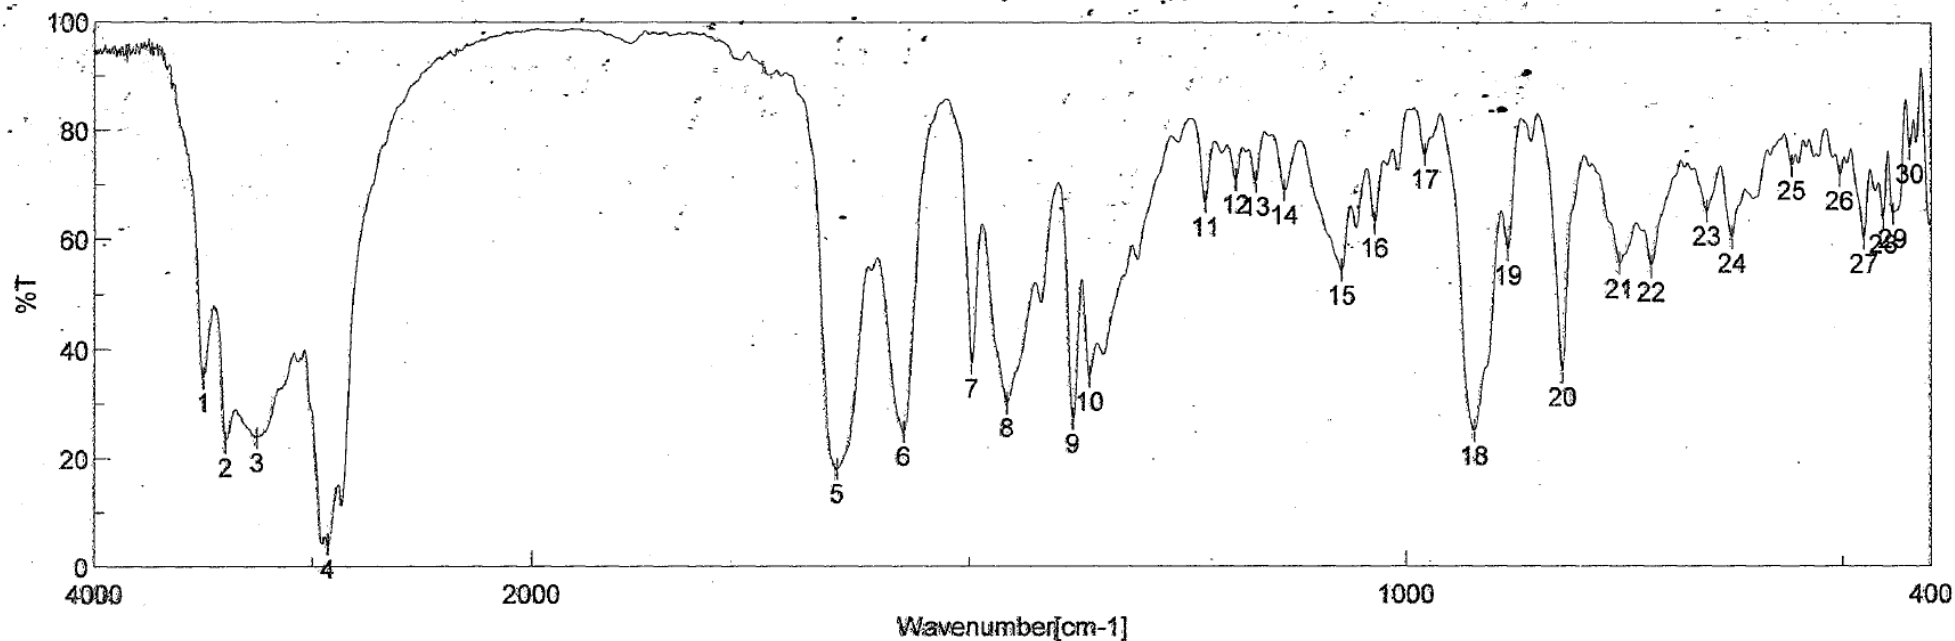

積算回数 4  
 ゼロフィリング ON  
 ゲイン 16  
 測定日時 2018/06/08 13:40  
 測定者 takase  
 ファイル名 Memory#2  
 サンプル名 N-OH-dehydroabietyl amidine  
 コメント

分解 4 cm-1  
 アポダイゼーション Cosine  
 スキャンスピード 2 mm/sec  
 更新日時 2018/06/08 13:40

|              |       |              |       |              |       |              |       |
|--------------|-------|--------------|-------|--------------|-------|--------------|-------|
| 1: 3500.17,  | 34.77 | 2: 3398.92,  | 22.89 | 3: 3255.25,  | 23.82 | 4: 2930.31,  | 4.13  |
| 5: 1650.77,  | 18.04 | 6: 1574.59,  | 24.96 | 7: 1497.45,  | 37.42 | 8: 1456.96,  | 30.18 |
| 9: 1381.75,  | 27.36 | 10: 1362.46, | 35.04 | 11: 1230.36, | 66.88 | 12: 1195.65, | 70.98 |
| 13: 1172.51, | 70.62 | 14: 1139.72, | 69.07 | 15: 1074.16, | 54.54 | 16: 1036.55, | 63.03 |
| 17: 978.70,  | 75.61 | 18: 922.77,  | 25.09 | 19: 884.20,  | 58.13 | 20: 821.53,  | 35.89 |
| 21: 756.92,  | 55.72 | 22: 720.28,  | 55.16 | 23: 656.64,  | 65.21 | 24: 627.72,  | 60.30 |
| 25: 559.26,  | 73.60 | 26: 504.29,  | 71.75 | 27: 476.33,  | 60.22 | 28: 454.15,  | 63.76 |
| 29: 443.55,  | 64.76 | 30: 424.26,  | 76.69 |              |       |              |       |

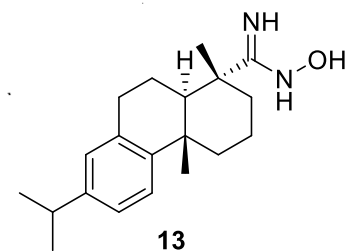

1H

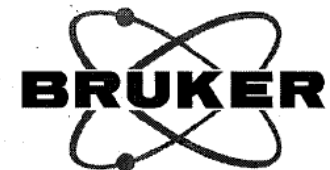

Current Data Parameters  
 NAME A17mc219tf  
 EXPNO 18061201  
 PROCNO 1

F2 - Acquisition Parameters  
 Date 20180612  
 Time 15.46  
 INSTRUM spect  
 PROBHD 5 mm PABBO BB-  
 PULPROG zg30  
 TD 65536  
 SOLVENT CDCl3  
 NS 8  
 DS 2  
 SWH 6188.119 Hz  
 FIDRES 0.094423 Hz  
 AQ 5.2953587 sec  
 RG 203  
 DW 80.800 usec  
 DE 6.50 usec  
 TE 296.4 K  
 D1 1.00000000 sec  
 TD0 1

===== CHANNEL f1 =====  
 NUC1 1H  
 P1 15.00 usec  
 PL1 1.20 dB  
 PL1W 8.19348145 W  
 SFO1 300.1318534 MHz

F2 - Processing parameters  
 SI 32768  
 SF 300.1300057 MHz  
 WDW EM  
 SSB 0  
 LB 0.30 Hz  
 GB 0  
 PC 1.00

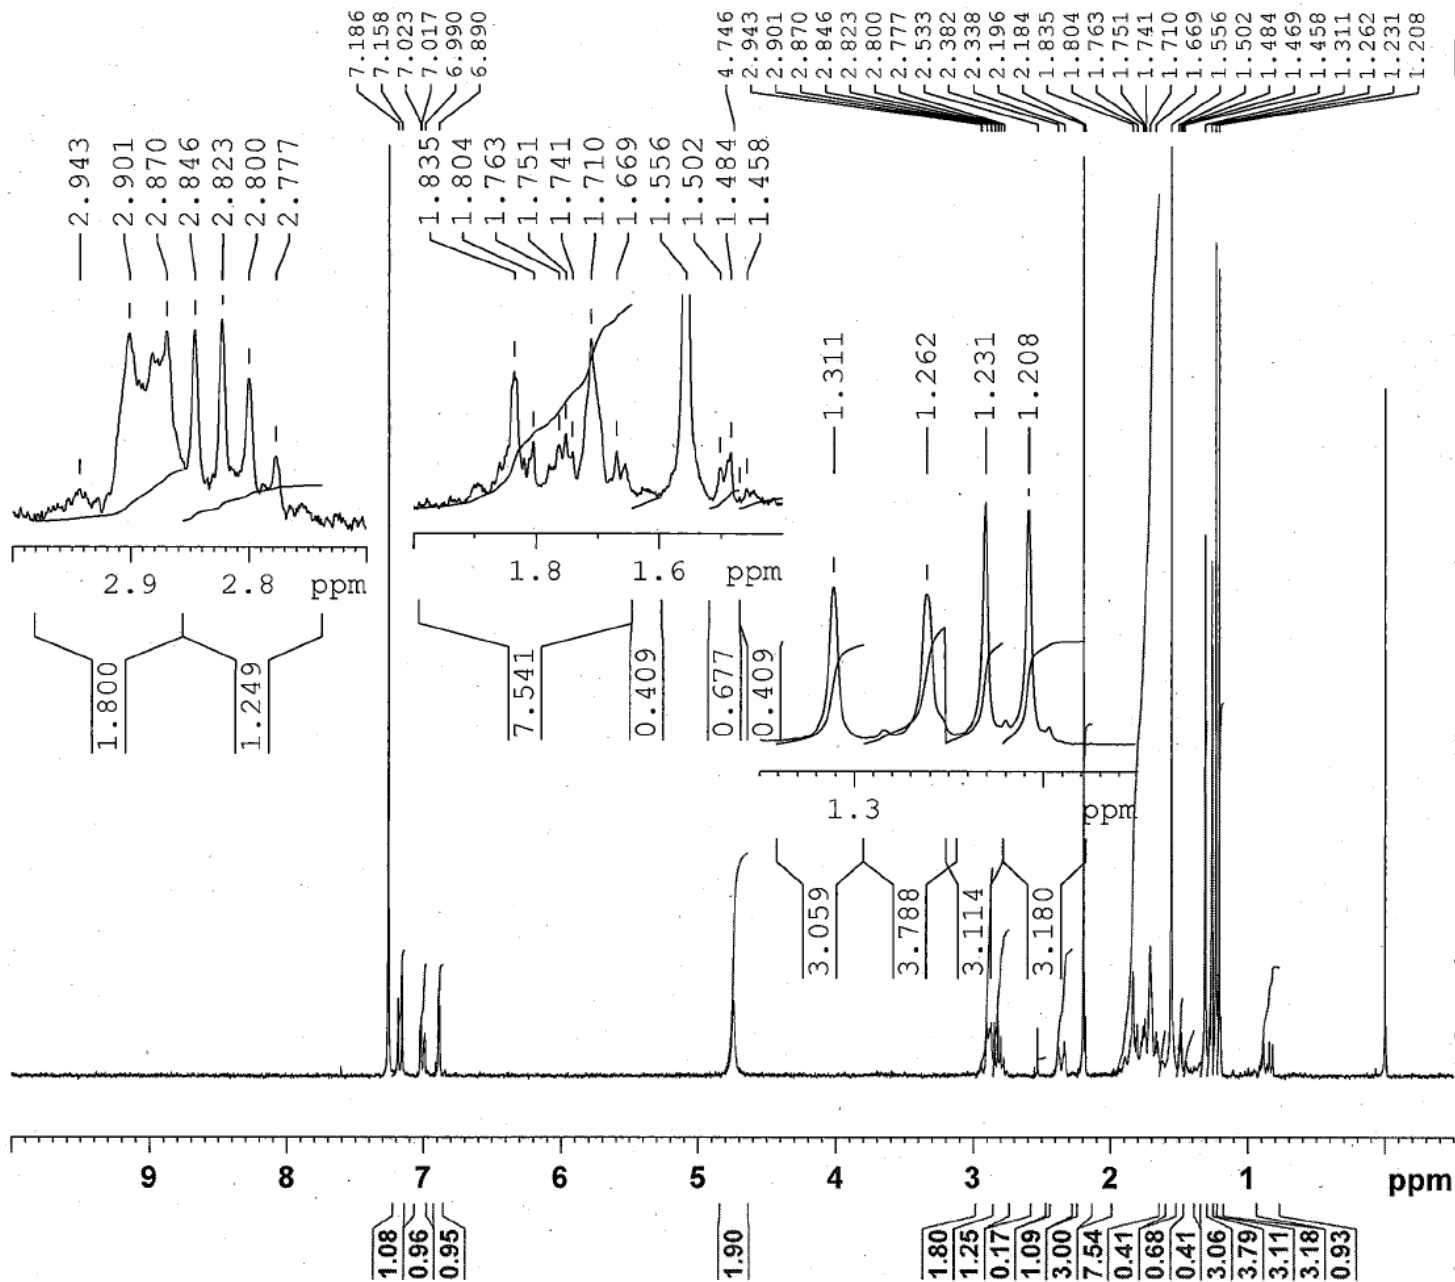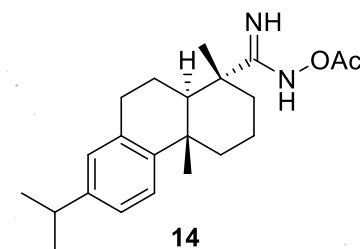



13C with dec. CPQNP

— 169.73  
 — 163.48  
 — 146.96  
 — 145.94  
 — 134.60  
 — 126.97  
 — 124.01

46.40  
 43.49  
 40.29  
 38.14  
 37.90  
 37.41  
 33.46  
 29.96  
 25.47  
 23.96  
 20.39  
 20.15  
 18.62  
 15.95

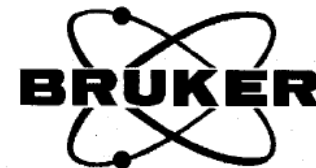

Current Data Parameters  
 NAME Al7mc219tf  
 EXPNO 19011001  
 PROCNO 1

F2 - Acquisition Parameters  
 Date 20190110  
 Time 12.36  
 INSTRUM spect  
 PROBHD 5 mm CPQNP 1H/  
 PULPROG zgpg30  
 TD 65536  
 SOLVENT CDCl3  
 NS 256  
 DS 2  
 SWH 29761.904 Hz  
 FIDRES 0.454131 Hz  
 AQ 1.1010548 sec  
 RG 126.99  
 DW 16.800 usec  
 DE 18.00 usec  
 TE 300.0 K  
 D1 2.00000000 sec  
 D11 0.03000000 sec  
 TDO 1

----- CHANNEL f1 -----  
 NUC1 13C  
 P1 12.00 usec  
 PLW1 15.50000000 W  
 SFO1 100.6248425 MHz

----- CHANNEL f2 -----  
 CPDPRG2 waltz16  
 NUC2 1H  
 PCPD2 90.00 usec  
 PLW2 5.19999981 W  
 PLW12 0.14444000 W  
 PLW13 0.11700000 W  
 SFO2 400.1316005 MHz

F2 - Processing parameters  
 SI 32768  
 SF 100.6127690 MHz  
 WDW EM  
 SSB 0  
 LB 2.00 Hz  
 GB 0  
 PC 1.40

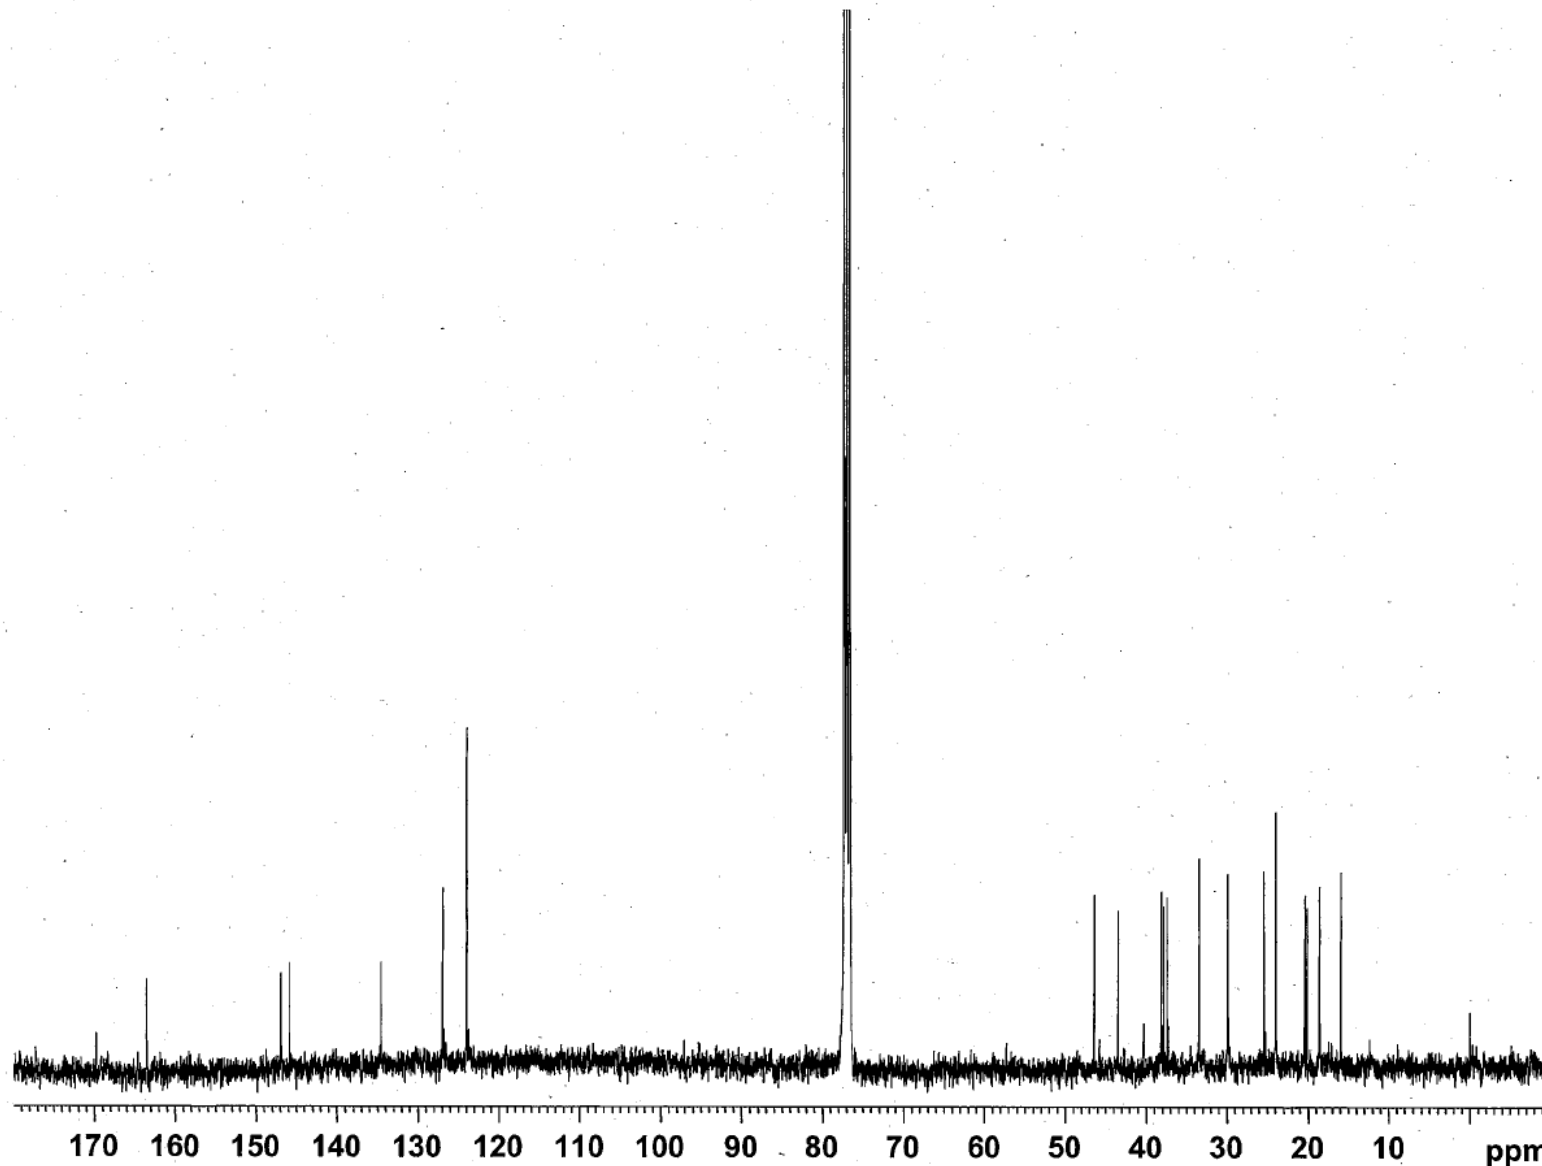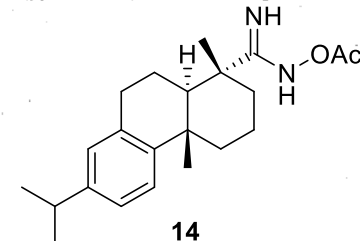

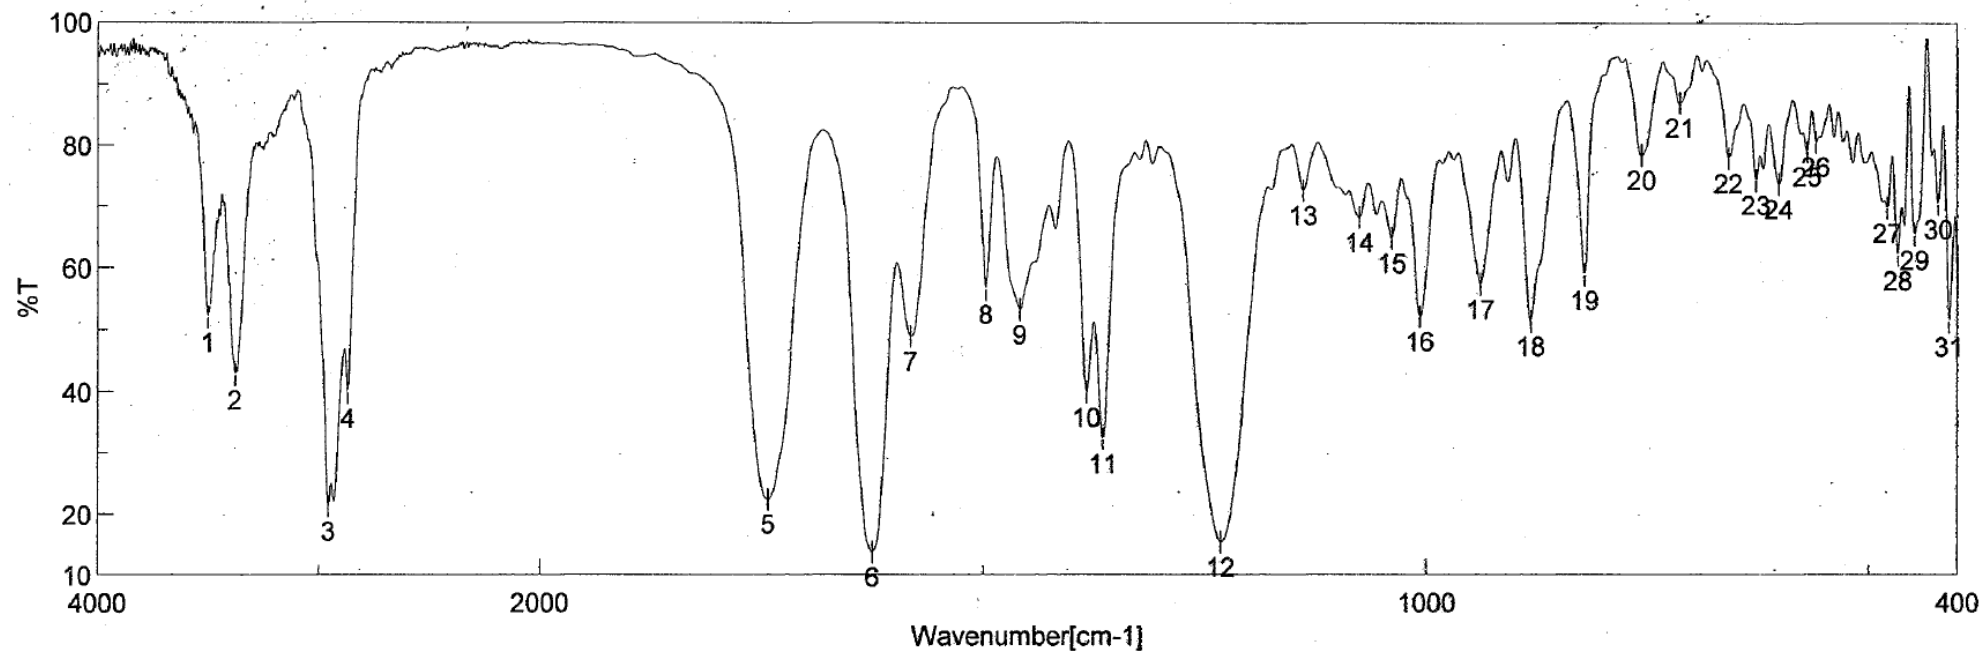

積算回数  
ゼロフィリング  
ゲイン  
測定日時  
測定者  
ファイル名  
サンプル名  
コメント

4  
ON  
16  
2018/06/12 17:45  
takase  
Memory#2  
N-AcO-dehydroabietyl amide

分解  
アポダイゼーション  
スキャンスピード  
更新日時

4 cm-1  
Cosine  
2 mm/sec  
2018/06/12 17:46

|              |       |              |       |              |       |              |       |
|--------------|-------|--------------|-------|--------------|-------|--------------|-------|
| 1: 3501.13,  | 52.07 | 2: 3377.71,  | 42.70 | 3: 2957.30,  | 21.25 | 4: 2868.59,  | 39.70 |
| 5: 1743.33,  | 22.37 | 6: 1625.70,  | 13.72 | 7: 1582.31,  | 49.04 | 8: 1497.45,  | 56.66 |
| 9: 1458.89,  | 53.37 | 10: 1383.68, | 39.86 | 11: 1364.39, | 32.31 | 12: 1231.33, | 15.32 |
| 13: 1138.76, | 72.66 | 14: 1076.08, | 68.29 | 15: 1039.44, | 64.88 | 16: 1007.62, | 52.32 |
| 17: 939.16,  | 57.53 | 18: 882.27,  | 51.53 | 19: 821.53,  | 59.00 | 20: 756.92,  | 78.48 |
| 21: 713.53,  | 87.06 | 22: 658.57,  | 77.93 | 23: 627.72,  | 74.39 | 24: 601.68,  | 73.72 |
| 25: 569.86,  | 79.12 | 26: 560.22,  | 80.70 | 27: 479.22,  | 69.90 | 28: 467.65,  | 62.21 |
| 29: 448.37,  | 65.47 | 30: 421.37,  | 70.48 | 31: 409.80,  | 51.49 |              |       |

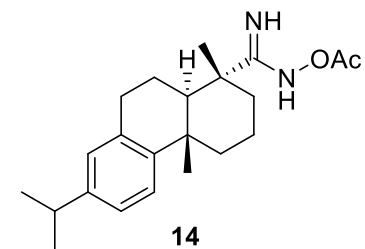

1H

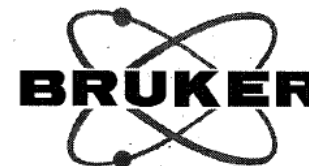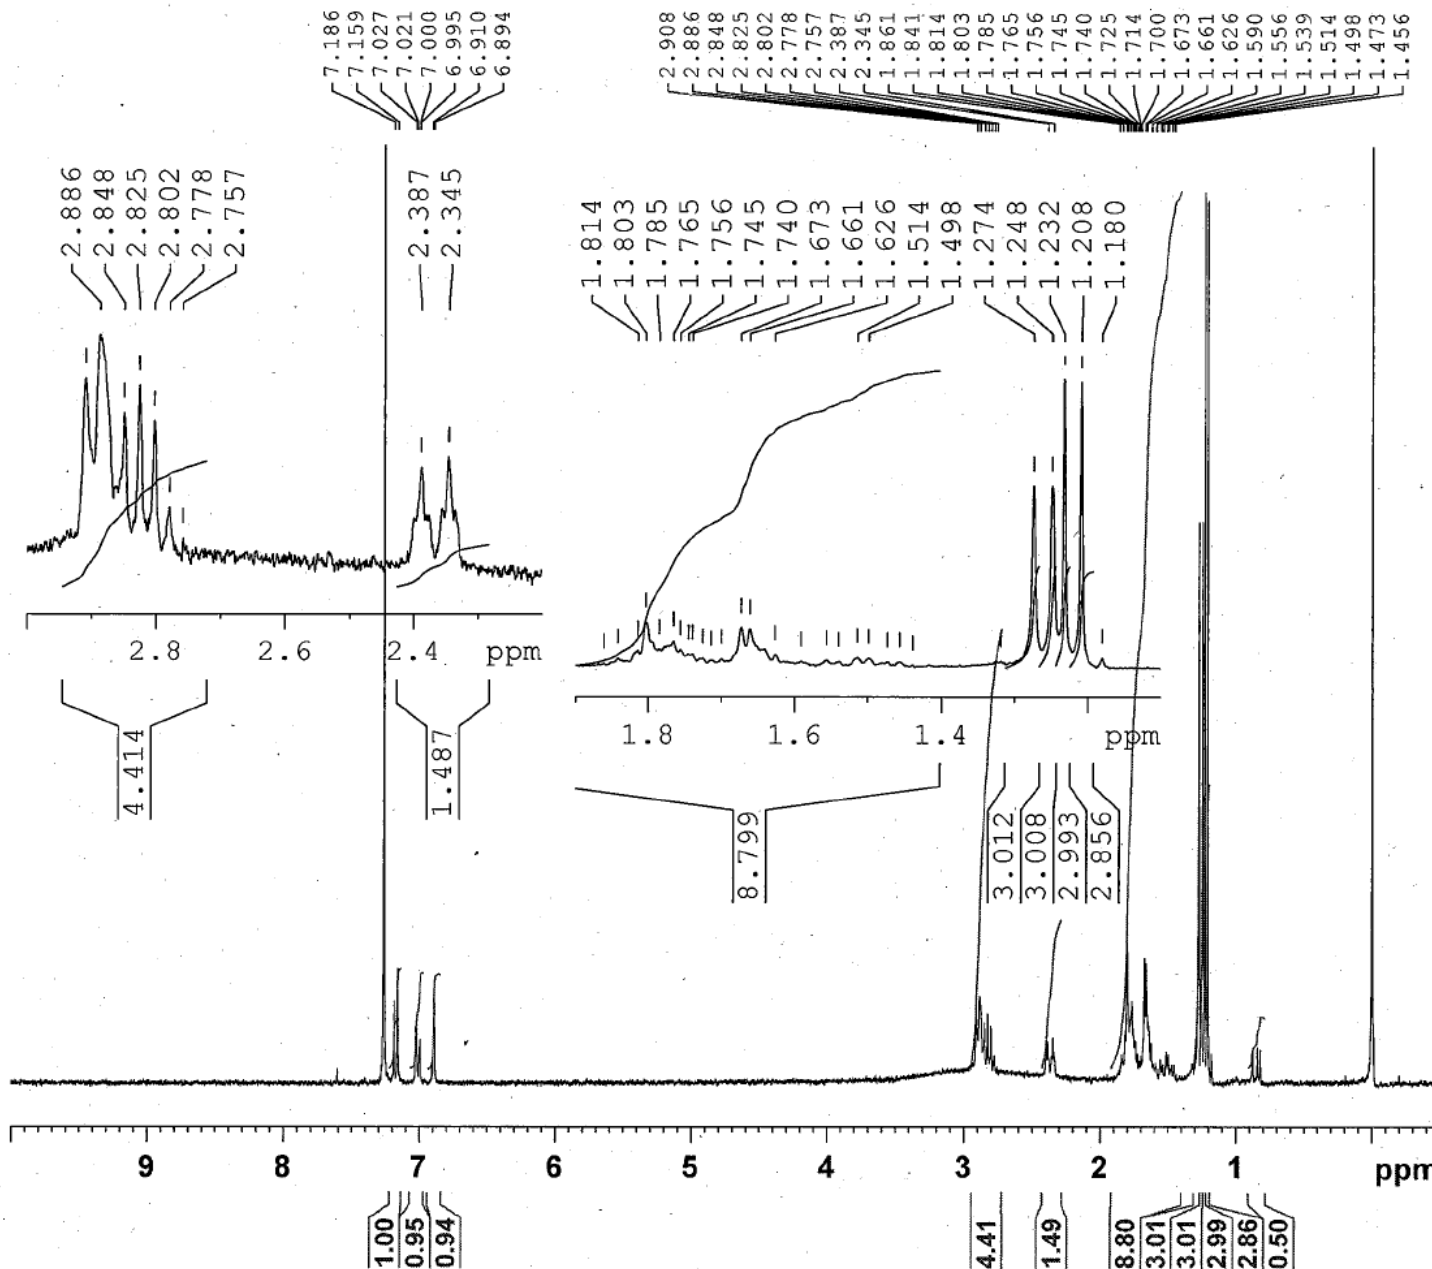

Current Data Parameters  
 NAME A17mc219tf  
 EXPNO 18072701  
 PROCNO 1

F2 - Acquisition Parameters  
 Date\_ 20180727  
 Time 14.02  
 INSTRUM spect  
 PROBHD 5 mm PABBO BB-  
 PULPROG zg30  
 TD 65536  
 SOLVENT CDCl3  
 NS 8  
 DS 2  
 SWH 6188.119 Hz  
 FIDRES 0.094423 Hz  
 AQ 5.2953587 sec  
 RG 203  
 DW 80.800 usec  
 DE 6.50 usec  
 TE 296.7 K  
 D1 1.00000000 sec  
 TDO 1

----- CHANNEL f1 -----  
 NUC1 1H  
 P1 15.00 usec  
 PL1 1.20 dB  
 PL1W 8.19348145 W  
 SFO1 300.1318534 MHz

F2 - Processing parameters  
 SI 32768  
 SF 300.1300057 MHz  
 WDW EM  
 SSB 0  
 LB 0.30 Hz  
 GB 0  
 PC 1.00

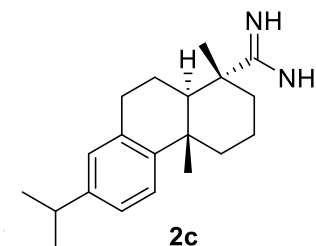

13C with dec. CPQNP

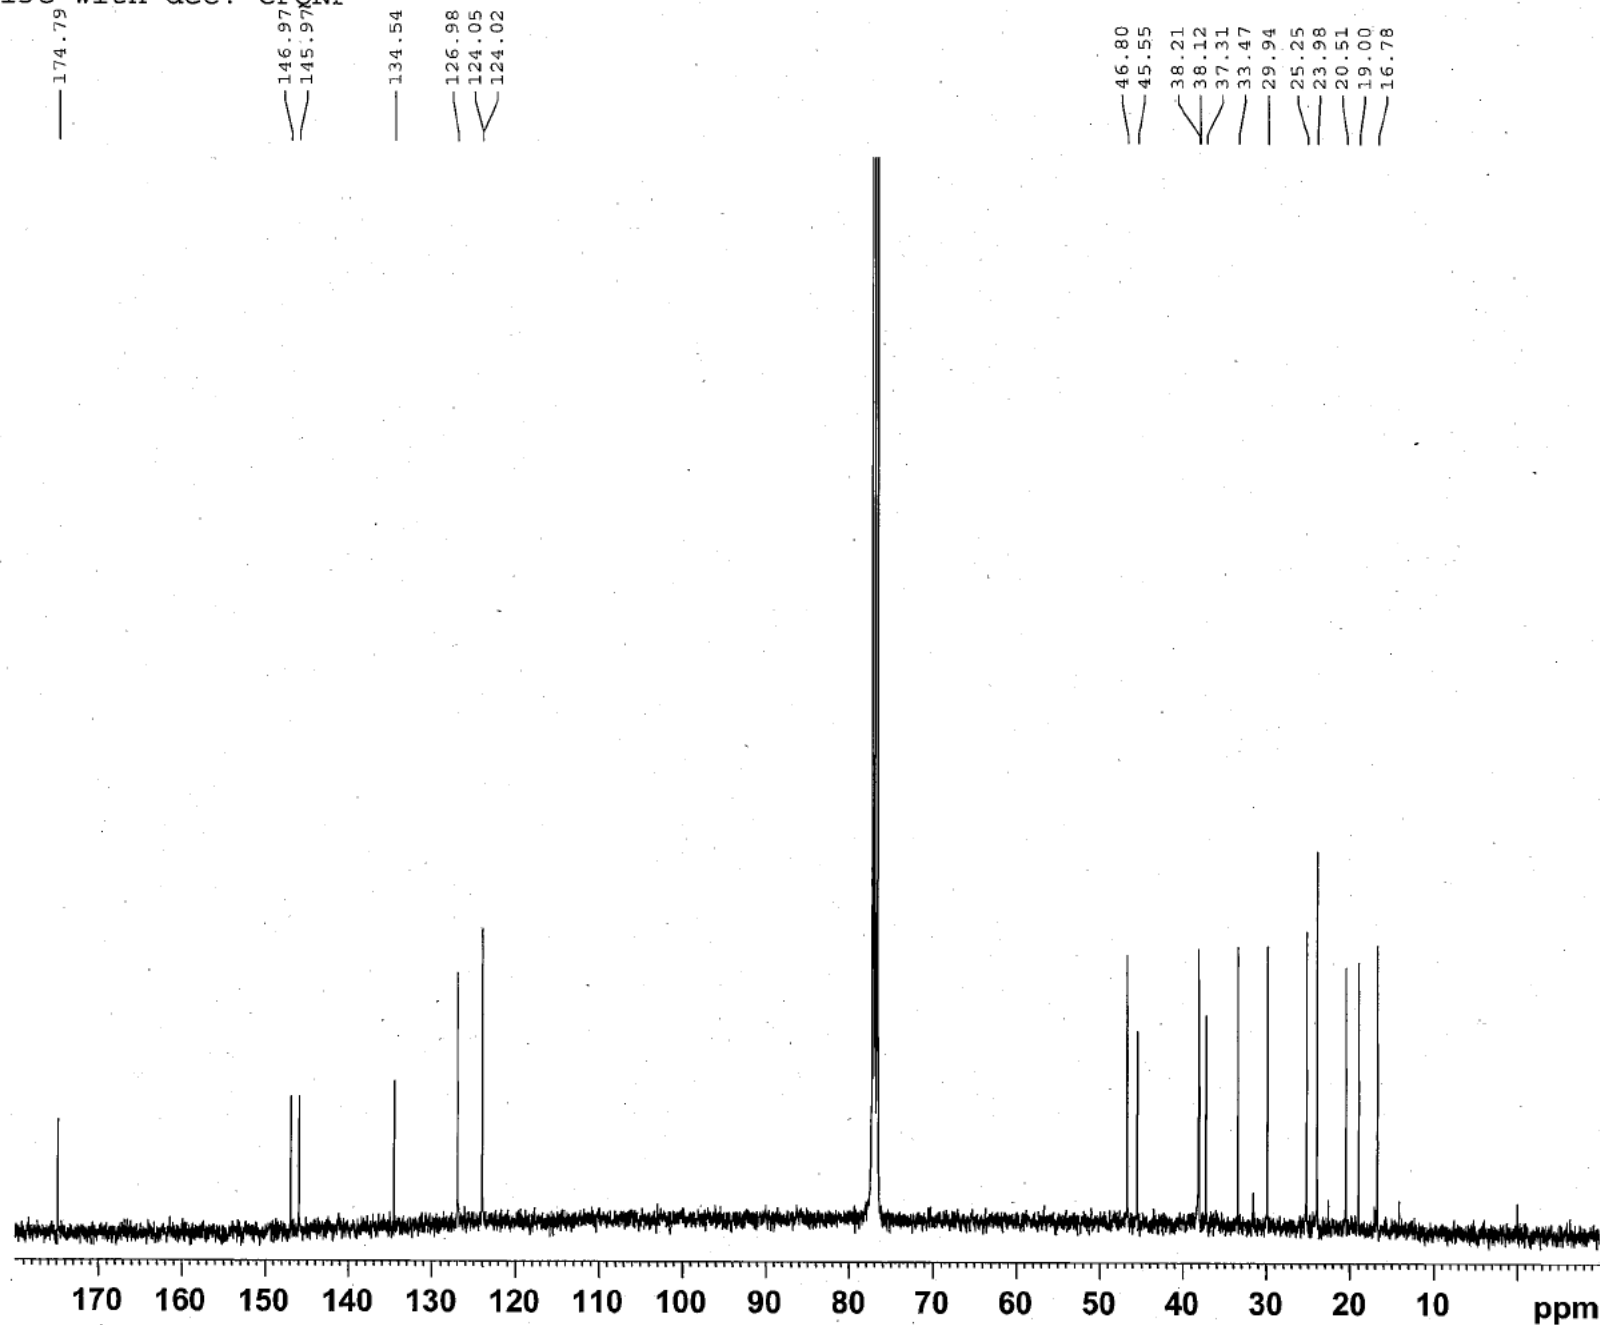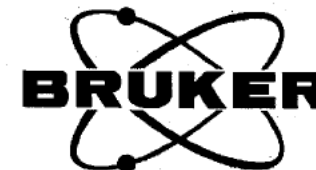

Current Data Parameters  
NAME A17mc219tf  
EXPNO 19011002  
PROCNO 1

F2 - Acquisition Parameters  
Date\_ 20190110  
Time\_ 12.52  
INSTRUM spect  
PROBHD 5 mm CPQNP 1H/  
PULPROG zgpg30  
TD 65536  
SOLVENT CDCl3  
NS 128  
DS 2  
SWH 29761.904 Hz  
FIDRES 0.454131 Hz  
AQ 1.1010548 sec  
RG 126.99  
DW 16.800 usec  
DE 18.00 usec  
TE 300.0 K  
D1 2.00000000 sec  
D11 0.03000000 sec  
TDO 1

==== CHANNEL f1 =====  
NUC1 13C  
P1 12.00 usec  
PLW1 15.50000000 W  
SFO1 100.6248425 MHz

==== CHANNEL f2 =====  
CPDPRG2 waltz16  
NUC2 1H  
PCPD2 90.00 usec  
PLW2 5.19999981 W  
PLW12 0.14444000 W  
PLW13 0.11700000 W  
SFO2 400.1316005 MHz

F2 - Processing parameters  
SI 32768  
SF 100.6127681 MHz  
WDW EM  
SSB 0  
LB 2.00 Hz  
GB 0  
PC 1.40

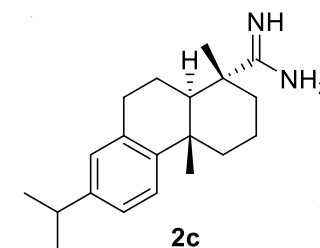

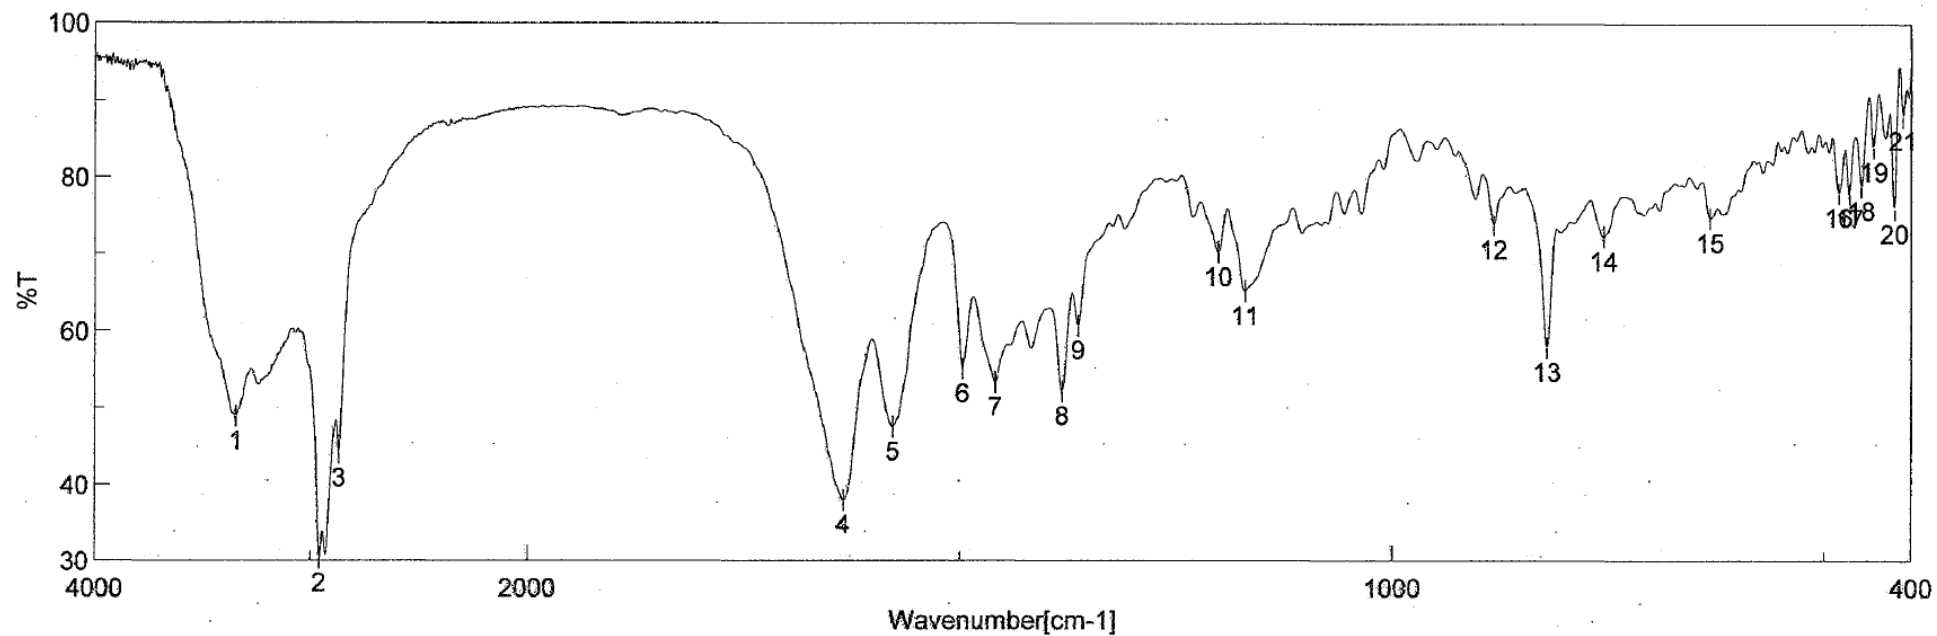

積算回数  
ゼロフィリング  
ゲイン  
測定日時  
測定者  
ファイル名  
サンプル名  
コメント

16  
ON  
16  
2018/07/25 15:11  
takase  
Memory#2  
101, Dehydroabietyl amide

分解  
アポダイゼーション  
スキャンスピード  
更新日時

4 cm-1  
Cosine  
2 mm/sec  
2018/07/25 15:11

|     |          |       |     |          |       |     |          |       |     |          |       |
|-----|----------|-------|-----|----------|-------|-----|----------|-------|-----|----------|-------|
| 1:  | 3344.93, | 48.89 | 2:  | 2958.27, | 30.33 | 3:  | 2868.59, | 44.06 | 4:  | 1634.38, | 37.97 |
| 5:  | 1577.49, | 47.56 | 6:  | 1496.49, | 55.13 | 7:  | 1458.89, | 53.39 | 8:  | 1381.75, | 52.19 |
| 9:  | 1363.43, | 60.76 | 10: | 1201.43, | 70.32 | 11: | 1170.58, | 65.31 | 12: | 883.24,  | 73.85 |
| 13: | 821.53,  | 57.97 | 14: | 755.96,  | 72.32 | 15: | 632.54,  | 74.70 | 16: | 484.05,  | 78.04 |
| 17: | 471.51,  | 77.95 | 18: | 458.01,  | 78.90 | 19: | 443.55,  | 84.02 | 20: | 419.44,  | 75.91 |
| 21: | 409.80,  | 88.12 |     |          |       |     |          |       |     |          |       |

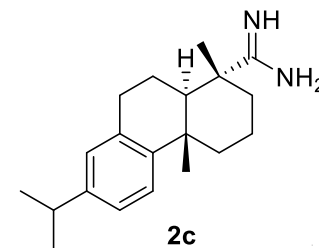

1H

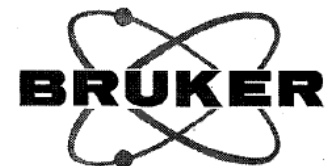

Current Data Parameters  
NAME A17mc219tf  
EXPNO 18092002  
PROCNO 1

F2 - Acquisition Parameters  
Date 20180920  
Time 10.16  
INSTRUM spect  
PROBHD 5 mm PABBO BB-  
PULPROG zg30  
TD 65536  
SOLVENT CDC13  
NS 8  
DS 2  
SWH 6188.119 Hz  
FIDRES 0.094423 Hz  
AQ 5.2953587 sec  
RG 203  
DW 80.800 usec  
DE 6.50 usec  
TE 299.6 K  
D1 1.0000000 sec  
TD0 1

==== CHANNEL f1 =====  
NUC1 1H  
P1 15.00 usec  
PL1 1.20 dB  
PL1W 8.19348145 W  
SFO1 300.1318534 MHz

F2 - Processing parameters  
SI 32768  
SF 300.1300062 MHz  
WDW EM  
SSB 0  
LB 0.30 Hz  
GB 0  
PC 1.00

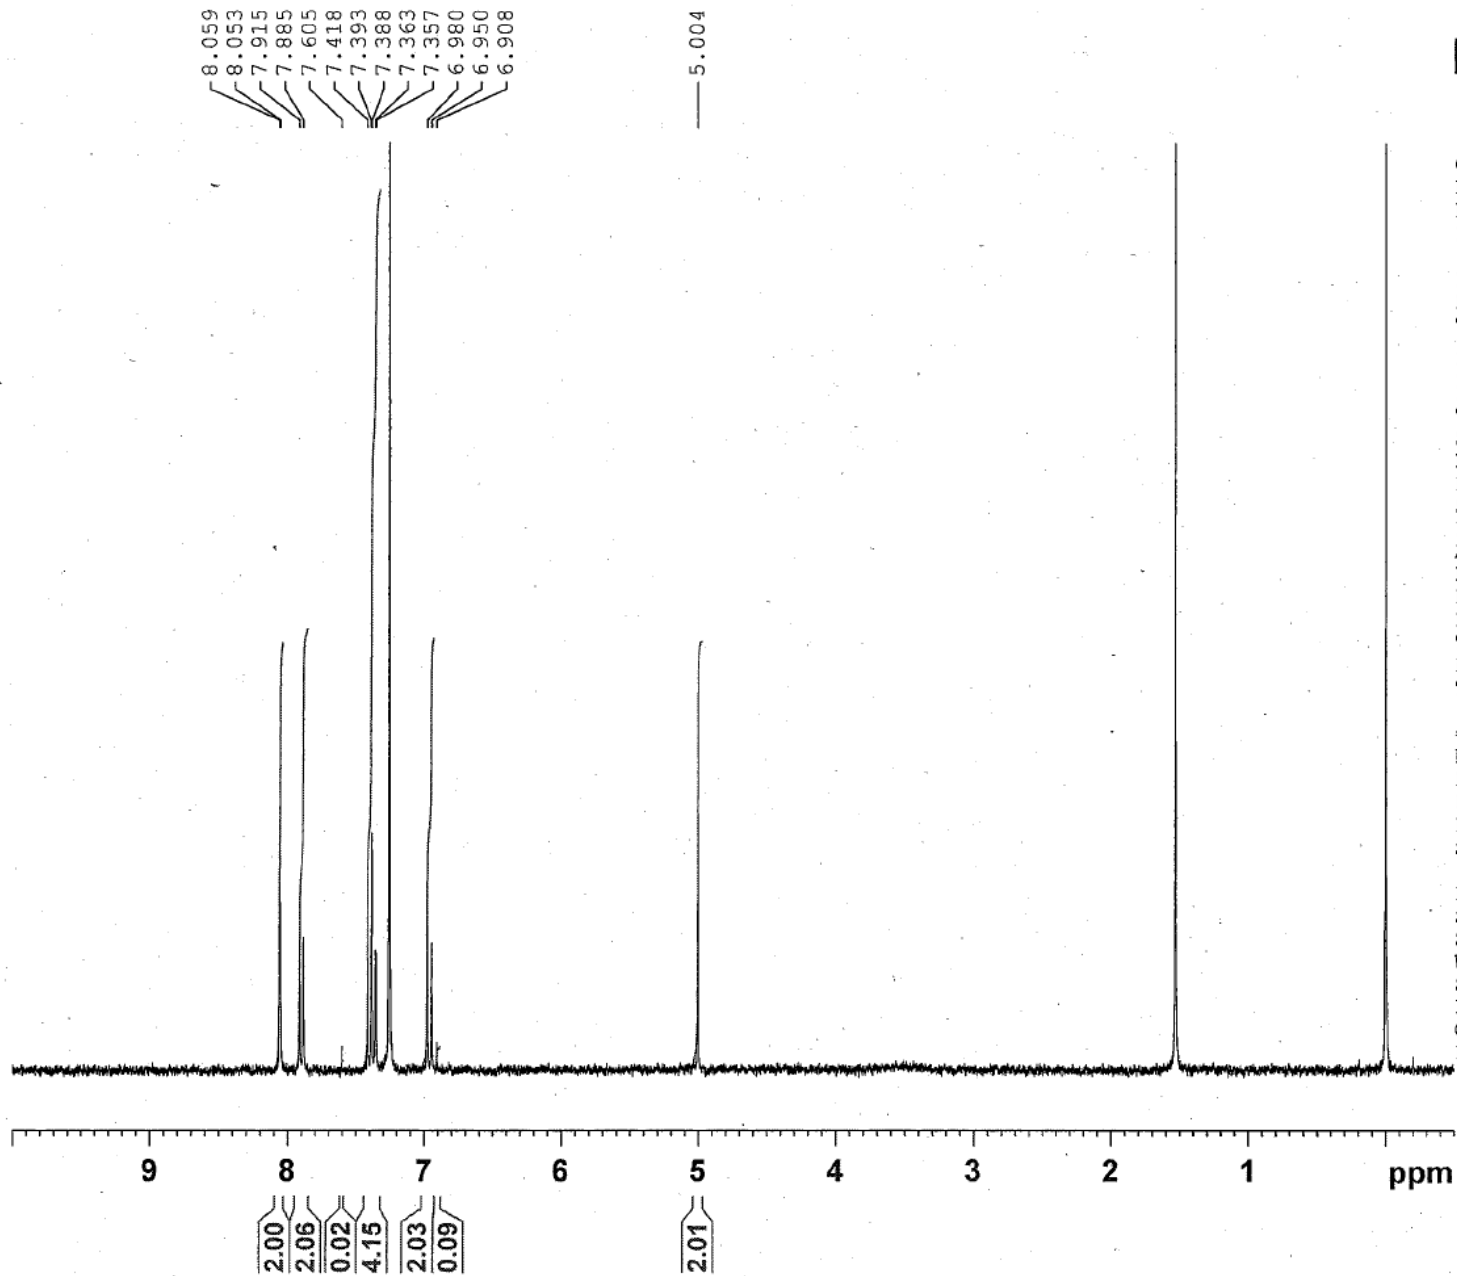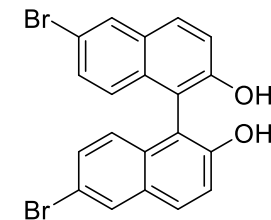

1b

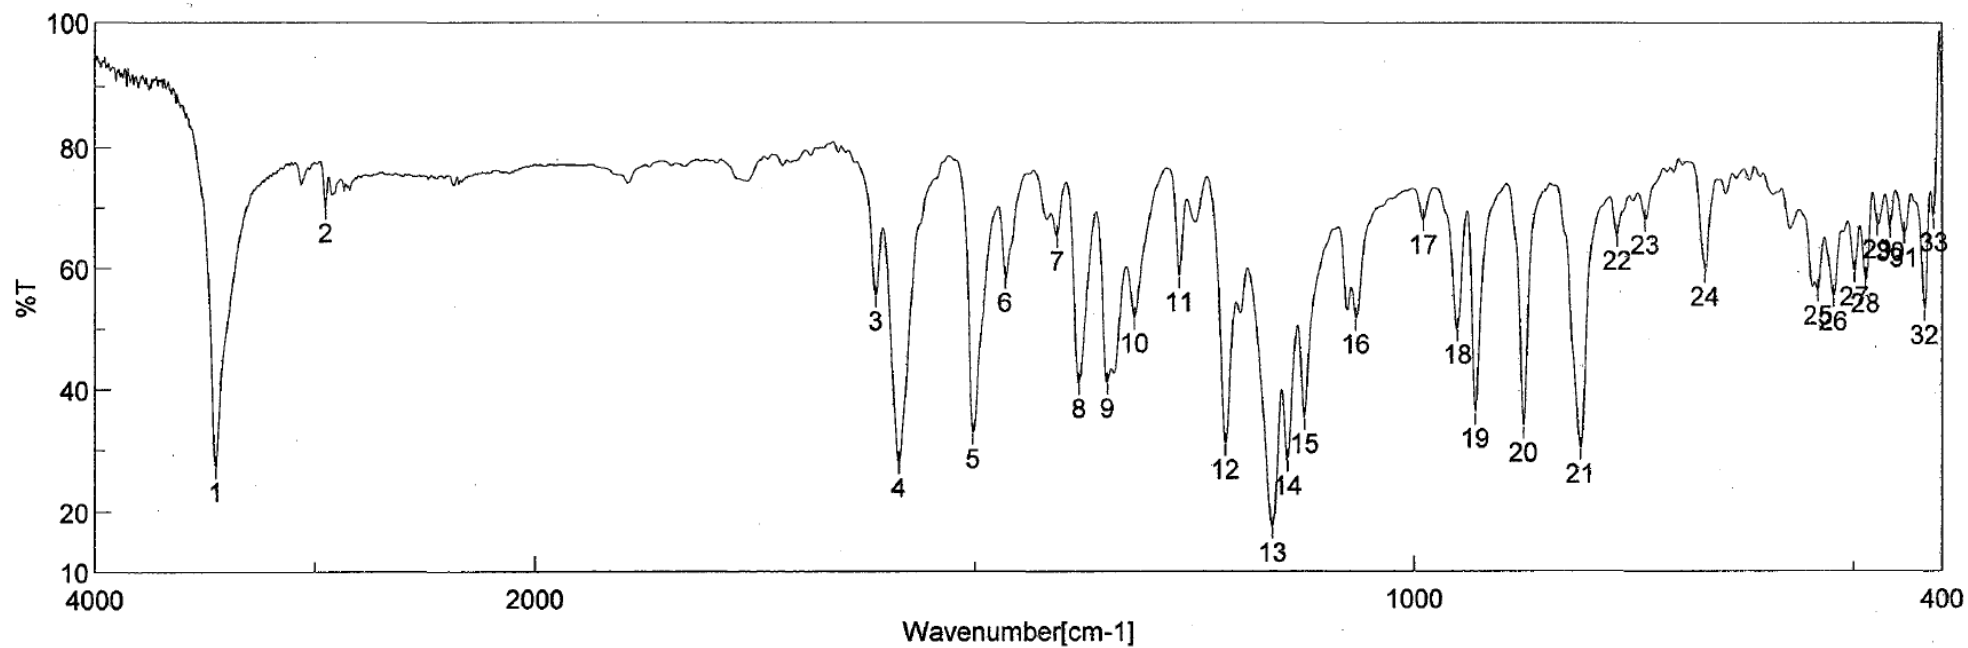

積算回数  
ゼロフィリング  
ゲイン  
測定日時  
測定者  
ファイル名  
サンプル名  
コメント

8  
ON  
16  
2019/01/26 12:52  
takase  
Memory#2  
113, 6,6'-dibromo-1,1'-bi-2-naphthol

分解  
アポダイゼーション  
スキャンスピード  
更新日時

4 cm-1  
Cosine  
2 mm/sec  
2019/01/26 12:52

|     |          |       |     |          |       |     |          |       |     |          |       |
|-----|----------|-------|-----|----------|-------|-----|----------|-------|-----|----------|-------|
| 1:  | 3450.99, | 27.31 | 2:  | 2952.48, | 69.93 | 3:  | 1612.20, | 55.39 | 4:  | 1586.16, | 27.97 |
| 5:  | 1502.28, | 32.70 | 6:  | 1465.63, | 58.48 | 7:  | 1406.82, | 65.23 | 8:  | 1381.75, | 40.93 |
| 9:  | 1349.93, | 40.96 | 10: | 1319.07, | 51.74 | 11: | 1267.97, | 58.55 | 12: | 1215.90, | 30.94 |
| 13: | 1161.90, | 17.26 | 14: | 1144.55, | 28.30 | 15: | 1125.26, | 35.17 | 16: | 1066.44, | 51.57 |
| 17: | 989.30,  | 67.94 | 18: | 950.73,  | 49.86 | 19: | 930.49,  | 36.02 | 20: | 875.52,  | 33.71 |
| 21: | 810.92,  | 30.26 | 22: | 769.46,  | 65.25 | 23: | 737.64,  | 67.89 | 24: | 670.14,  | 59.40 |
| 25: | 540.93,  | 56.33 | 26: | 523.58,  | 55.37 | 27: | 499.47,  | 59.45 | 28: | 486.94,  | 58.33 |
| 29: | 473.44,  | 67.14 | 30: | 458.98,  | 66.77 | 31: | 443.55,  | 65.77 | 32: | 420.41,  | 53.07 |
| 33: | 409.80,  | 68.30 |     |          |       |     |          |       |     |          |       |

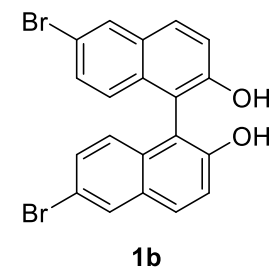

LH

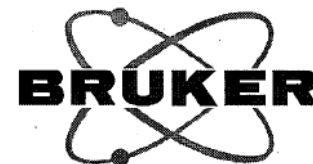

Current Data Parameters  
 NAME A17mc219tf  
 EXPNO 18100301  
 PROCNO 1

F2 - Acquisition Parameters  
 Date\_ 20181003  
 Time 11.21  
 INSTRUM spect  
 PROBHD 5 mm PABBO BB-  
 PULPROG zg30  
 TD 65536  
 SOLVENT CDC13  
 NS 8  
 DS 2  
 SWH 6188.119 Hz  
 FIDRES 0.094423 Hz  
 AQ 5.2953587 sec  
 RG 203  
 DW 80.800 usec  
 DE 6.50 usec  
 TE 299.5 K  
 DL 1.00000000 sec  
 TDO 1

===== CHANNEL f1 =====  
 NUC1 1H  
 P1 15.00 usec  
 PL1 1.20 dB  
 PL1W 8.19348145 W  
 SFO1 300.1318534 MHz

F2 - Processing parameters  
 SI 32768  
 SF 300.1300064 MHz  
 WDW EM  
 SSB 0  
 LB 0.30 Hz  
 GB 0  
 PC 1.00

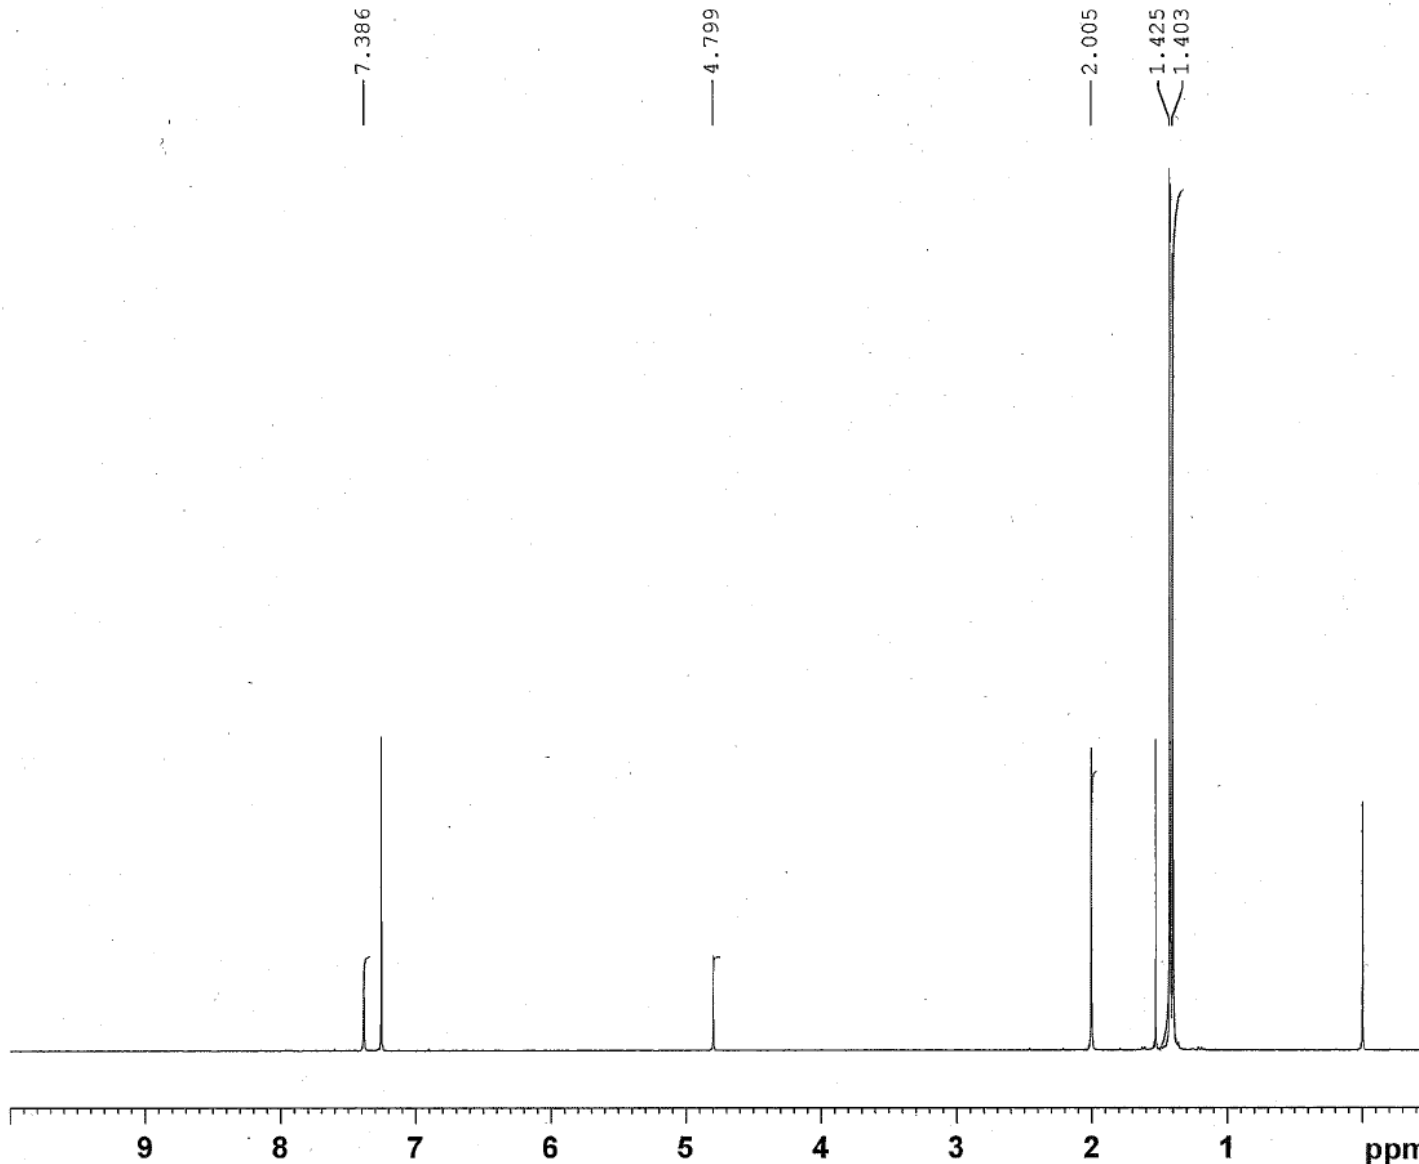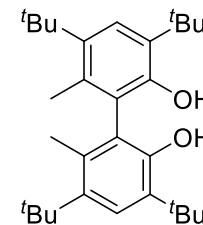



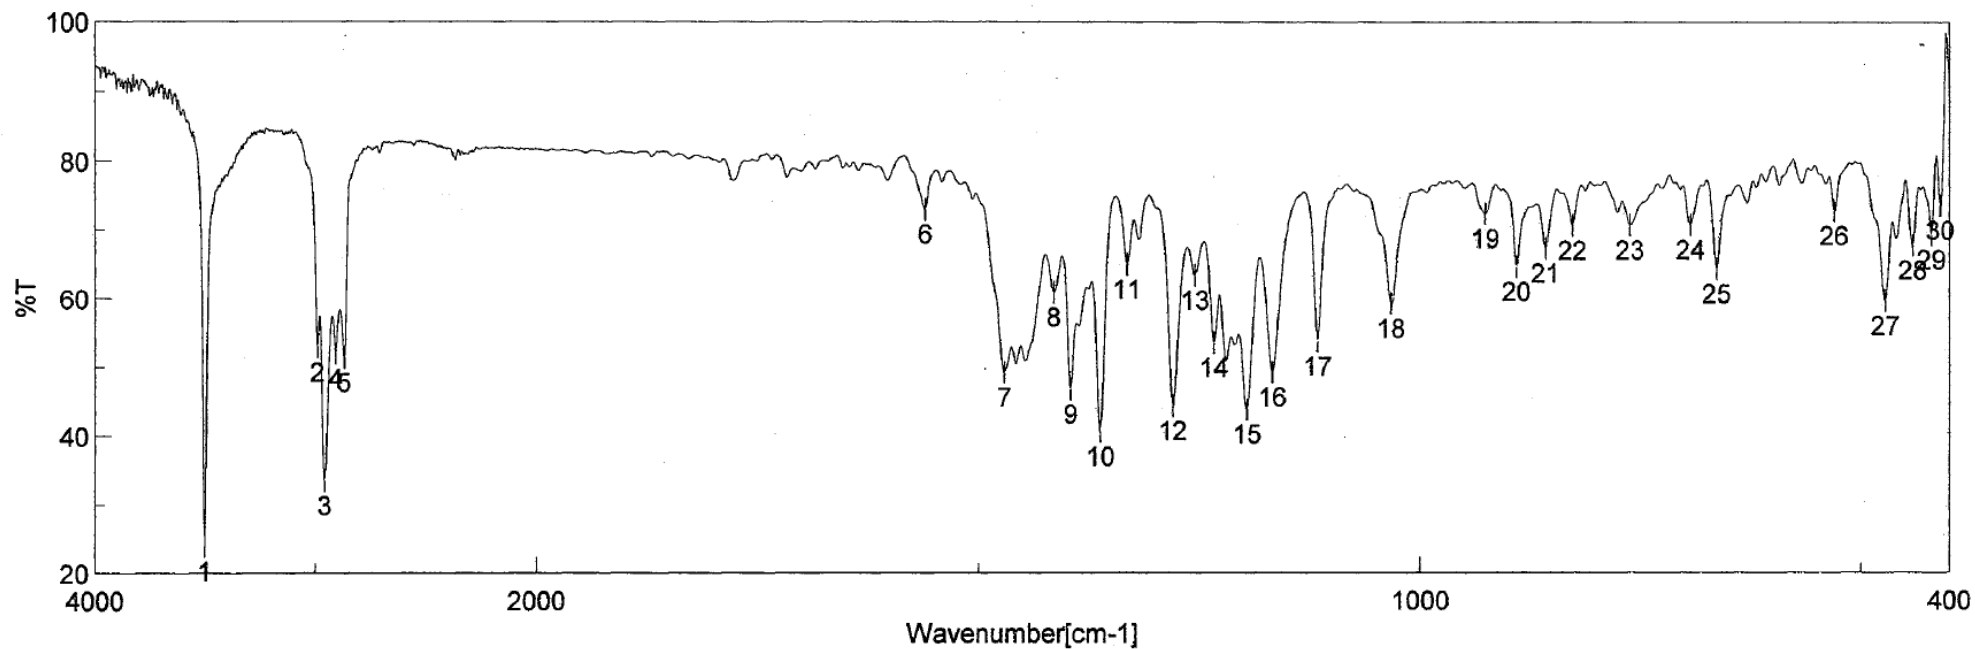

積算回数  
ゼロフィリング  
ゲイン  
測定日時  
測定者  
ファイル名  
サンプル名  
コメント

8  
ON  
16  
2019/01/26 13:11  
takase  
Memory#2  
116, 3,3',5,5'-tetra-tert-Bu-6,6'-dimethyl-2,2'-bisphenol

分解  
アポダイゼーション  
スキャンスピード  
更新日時

4 cm-1  
Cosine  
2 mm/sec  
2019/01/26 13:11

|     |          |       |     |          |       |     |          |       |     |          |       |
|-----|----------|-------|-----|----------|-------|-----|----------|-------|-----|----------|-------|
| 1:  | 3504.02, | 23.95 | 2:  | 2991.05, | 52.91 | 3:  | 2959.23, | 33.50 | 4:  | 2909.09, | 52.00 |
| 5:  | 2870.52, | 51.45 | 6:  | 1560.13, | 73.03 | 7:  | 1470.46, | 49.24 | 8:  | 1414.53, | 60.94 |
| 9:  | 1395.25, | 46.80 | 10: | 1361.50, | 40.61 | 11: | 1331.61, | 65.04 | 12: | 1279.54, | 44.36 |
| 13: | 1254.47, | 63.40 | 14: | 1233.25, | 53.55 | 15: | 1195.65, | 43.85 | 16: | 1166.72, | 49.29 |
| 17: | 1115.62, | 53.81 | 18: | 1032.69, | 59.31 | 19: | 926.63,  | 72.41 | 20: | 890.95,  | 64.71 |
| 21: | 858.17,  | 67.41 | 22: | 827.31,  | 70.71 | 23: | 761.74,  | 70.77 | 24: | 693.28,  | 70.77 |
| 25: | 663.39,  | 64.37 | 26: | 530.33,  | 72.83 | 27: | 472.47,  | 59.75 | 28: | 441.62,  | 67.87 |
| 29: | 420.41,  | 69.35 | 30: | 410.76,  | 73.62 |     |          |       |     |          |       |

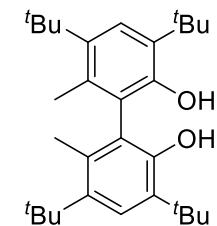

<sup>1</sup>H

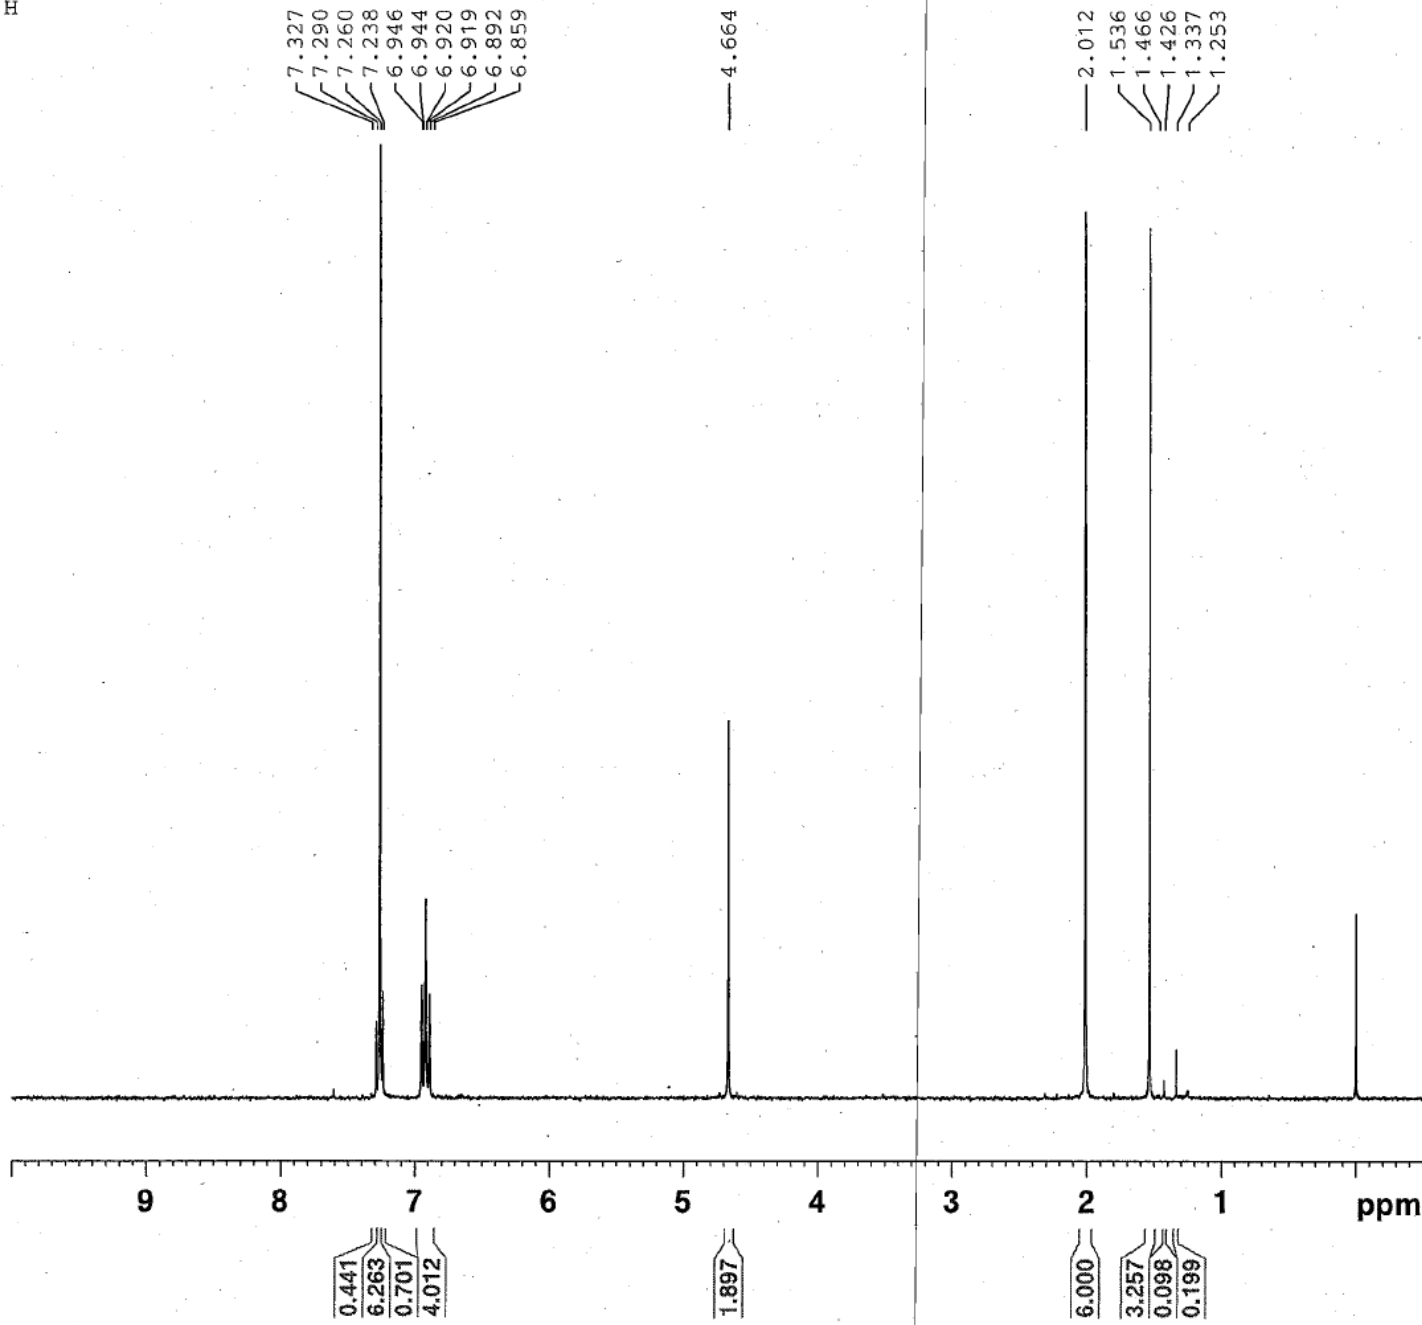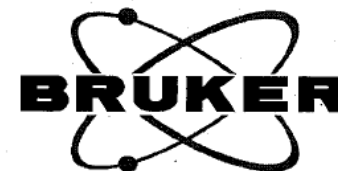

NAME A17mc219tf  
 EXPNO 18101201  
 PROCNO 1  
 Date\_ 20181012  
 Time 13.38  
 INSTRUM spect  
 PROBHD 5 mm PABBO BB-  
 PULPROG zg30  
 TD 65536  
 SOLVENT CDCl3  
 NS 8  
 DS 2  
 SWH 6188.119 Hz  
 FIDRES 0.094423 Hz  
 AQ 5.2953587 sec  
 RG 203  
 DW 80.800 usec  
 DE 6.50 usec  
 TE 297.4 K  
 D1 1.00000000 sec  
 TD0 1

----- CHANNEL f1 -----  
 NUC1 1H  
 P1 15.00 usec  
 PL1 1.20 dB  
 PL1W 8.19348145 W  
 SFO1 300.1318534 MHz  
 SI 32768  
 SF 300.1300061 MHz  
 WDW EM  
 SSB 0  
 LB 0.30 Hz  
 GB 0  
 PC 1.00

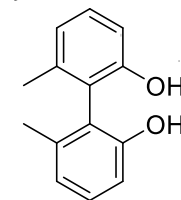

1c

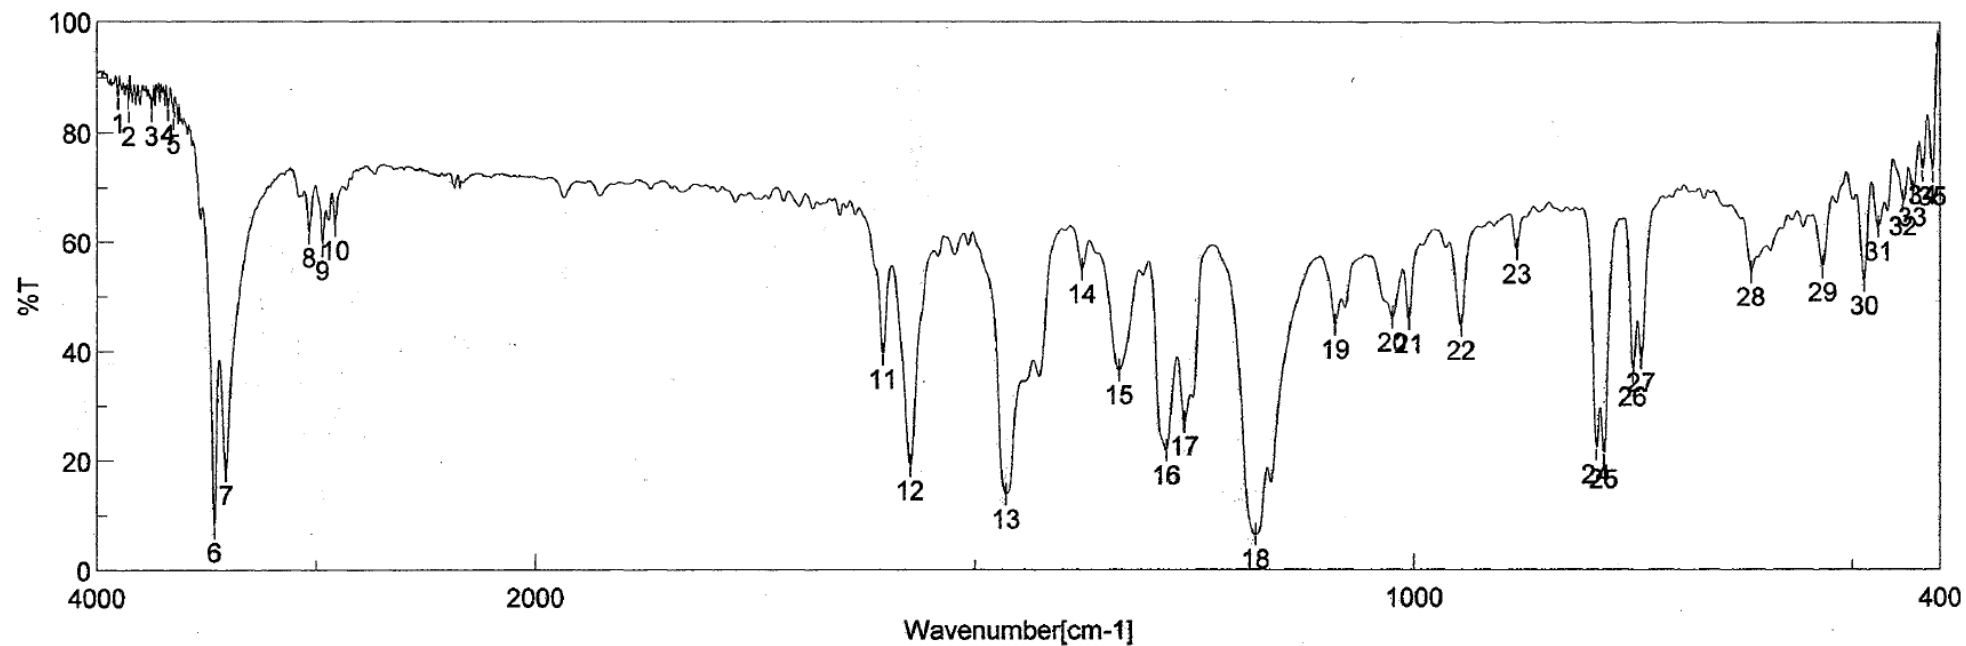

積算回数  
ゼロフィリング  
ゲイン  
測定日時  
測定者  
ファイル名  
サンプル名  
コメント

8  
ON  
16  
2019/01/26 13:29  
takase  
Memory#2  
120, 6, 6'-dimethyl-2, 2'-bisphenol

分解  
アポダイゼーション  
スキャンスピード  
更新日時

4 cm-1  
Cosine  
2 mm/sec  
2019/01/26 13:29

|              |       |              |       |              |       |              |       |
|--------------|-------|--------------|-------|--------------|-------|--------------|-------|
| 1: 3904.18,  | 86.25 | 2: 3855.01,  | 83.84 | 3: 3752.80,  | 83.90 | 4: 3677.59,  | 84.21 |
| 5: 3650.59,  | 82.50 | 6: 3464.49,  | 7.77  | 7: 3413.39,  | 18.29 | 8: 3034.44,  | 61.71 |
| 9: 2972.73,  | 59.36 | 10: 2914.88, | 63.04 | 11: 1605.45, | 39.46 | 12: 1574.59, | 19.06 |
| 13: 1464.67, | 13.81 | 14: 1377.89, | 55.16 | 15: 1335.46, | 36.63 | 16: 1281.47, | 21.89 |
| 17: 1261.22, | 27.16 | 18: 1180.22, | 6.51  | 19: 1089.58, | 44.96 | 20: 1024.98, | 46.32 |
| 21: 1005.70, | 46.00 | 22: 946.88,  | 44.81 | 23: 883.24,  | 58.86 | 24: 792.60,  | 22.07 |
| 25: 783.92,  | 21.16 | 26: 751.14,  | 36.28 | 27: 741.50,  | 38.90 | 28: 616.15,  | 54.69 |
| 29: 534.19,  | 55.62 | 30: 486.94,  | 53.09 | 31: 470.55,  | 62.99 | 32: 442.58,  | 67.61 |
| 33: 431.98,  | 69.32 | 34: 420.41,  | 73.30 | 35: 408.83,  | 73.07 |              |       |

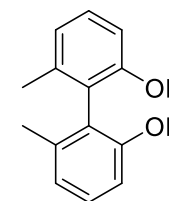

1c

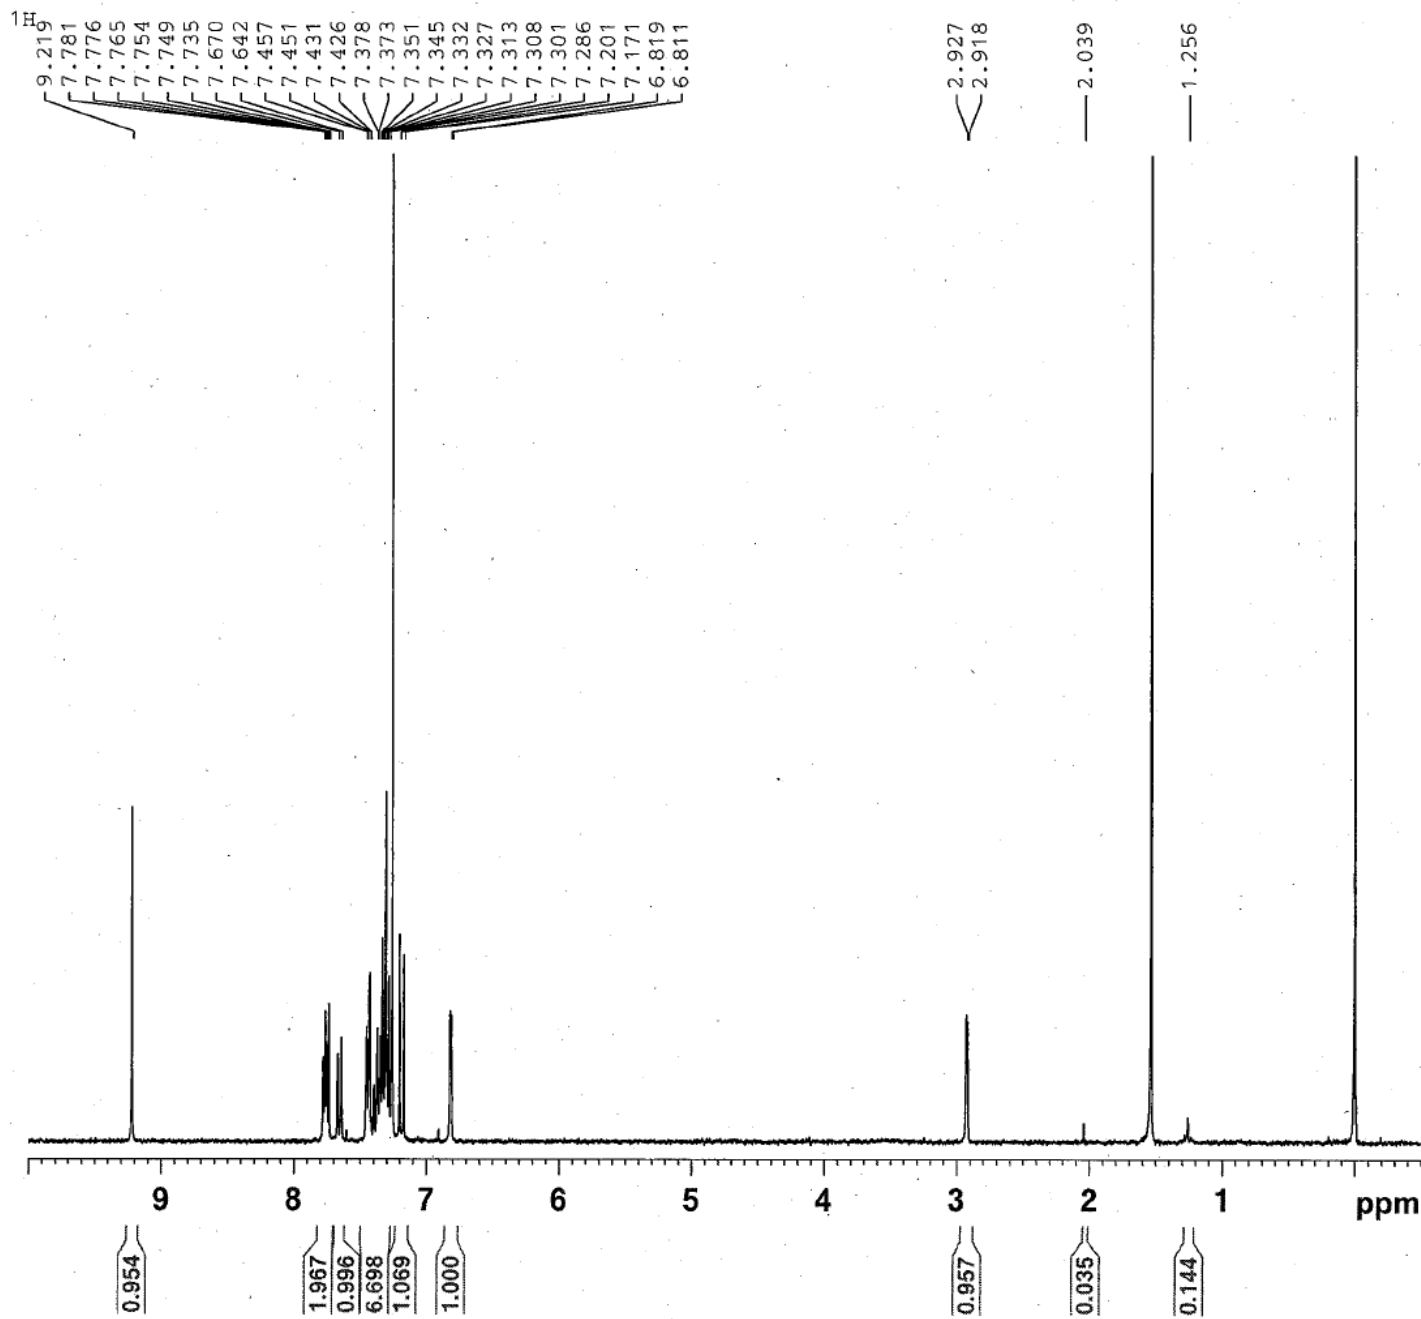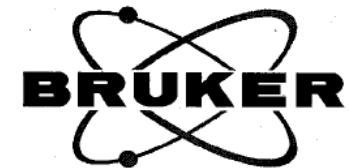

```

NAME      A17mc219tf
EXPNO     18091801
PROCNO    1
Date_     20180918
Time      16.59
INSTRUM   spect
PROBHD    5 mm PABBO BB-
PULPROG   zg30
TD        65536
SOLVENT   CDC13
NS        8
DS        2
SWH       6188.119 Hz
FIDRES    0.094423 Hz
AQ        5.2953587 sec
RG        203
DW        80.800 usec
DE        6.50 usec
TE        301.2 K
D1        1.00000000 sec
TD0       1
  
```

```

===== CHANNEL f1 =====
NUC1      1H
P1        15.00 usec
PL1       1.20 dB
PL1W      8.19348145 W
SFO1      300.1318534 MHz
SI        32768
SF        300.1300068 MHz
WDW       EM
SSB       0
LB        0.30 Hz
GB        0
PC        1.00
  
```

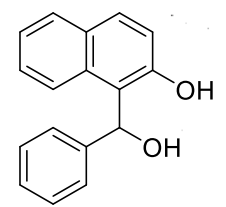

15

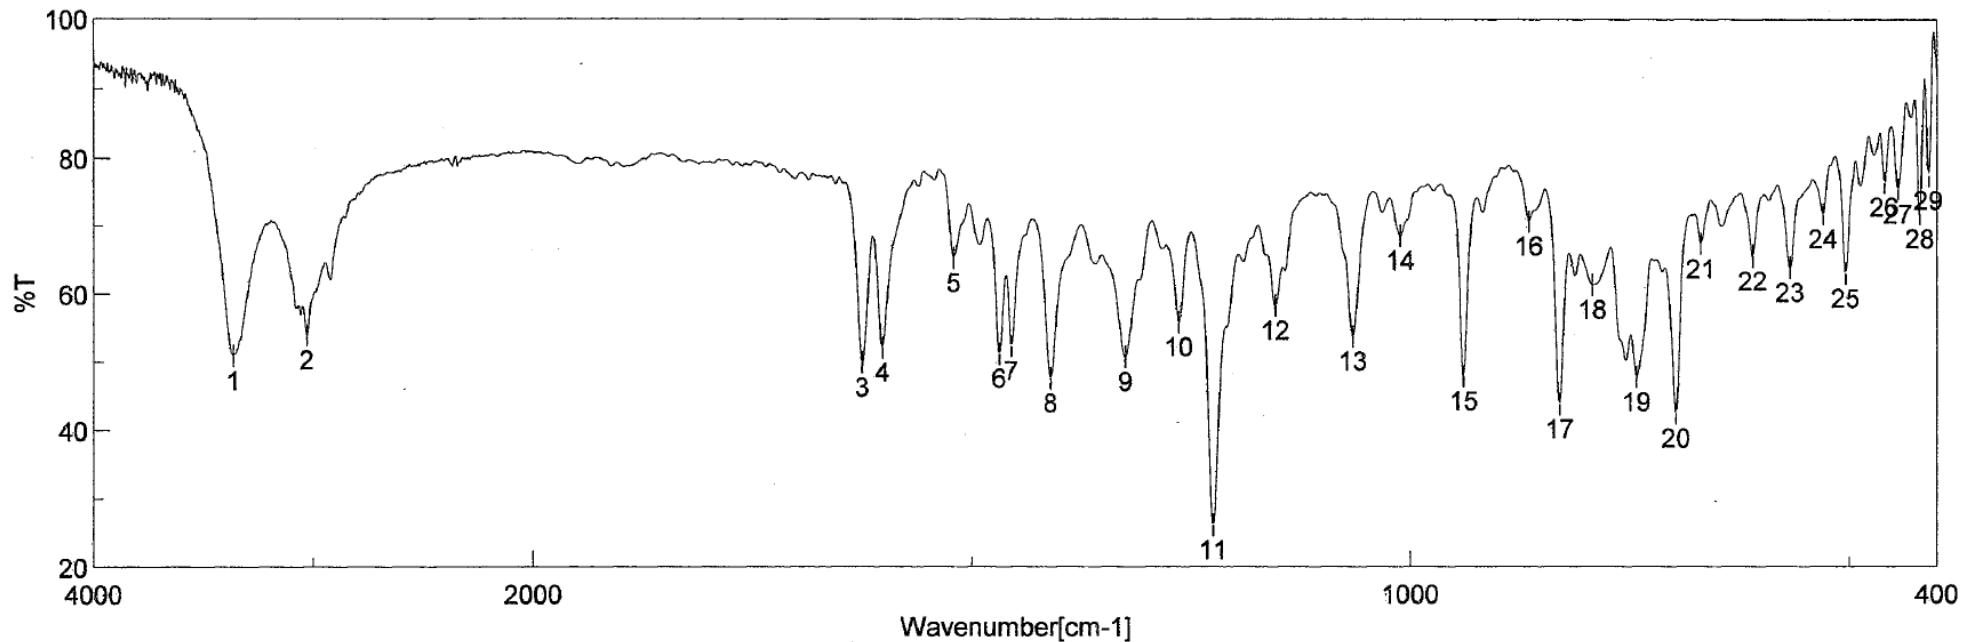

積算回数  
ゼロフィリング  
ゲイン  
測定日時  
測定者  
ファイル名  
サンプル名  
コメント

8  
ON  
16  
2019/01/26 12:38  
takase  
Memory#2  
111, 1-[hydroxy(phenyl)methyl]-2-naphthol

分解  
アポダイゼーション  
スキャンスピード  
更新日時

4 cm-1  
Cosine  
2 mm/sec  
2019/01/26 12:38

|     |          |       |     |          |       |     |          |       |     |          |       |
|-----|----------|-------|-----|----------|-------|-----|----------|-------|-----|----------|-------|
| 1:  | 3363.25, | 50.92 | 2:  | 3028.66, | 54.00 | 3:  | 1624.73, | 50.01 | 4:  | 1601.59, | 52.19 |
| 5:  | 1520.60, | 65.37 | 6:  | 1468.53, | 51.29 | 7:  | 1455.03, | 52.40 | 8:  | 1410.67, | 47.68 |
| 9:  | 1325.82, | 50.82 | 10: | 1265.07, | 55.94 | 11: | 1225.54, | 26.19 | 12: | 1154.19, | 58.40 |
| 13: | 1065.48, | 53.84 | 14: | 1011.48, | 68.62 | 15: | 939.16,  | 48.01 | 16: | 864.92,  | 70.71 |
| 17: | 830.21,  | 43.85 | 18: | 792.60,  | 61.45 | 19: | 742.46,  | 47.87 | 20: | 697.14,  | 42.51 |
| 21: | 669.18,  | 67.39 | 22: | 610.36,  | 65.62 | 23: | 567.93,  | 63.95 | 24: | 530.33,  | 71.78 |
| 25: | 504.29,  | 63.07 | 26: | 459.94,  | 76.45 | 27: | 444.51,  | 75.43 | 28: | 419.44,  | 71.79 |
| 29: | 409.80,  | 77.44 |     |          |       |     |          |       |     |          |       |

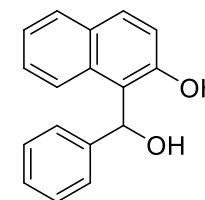

15

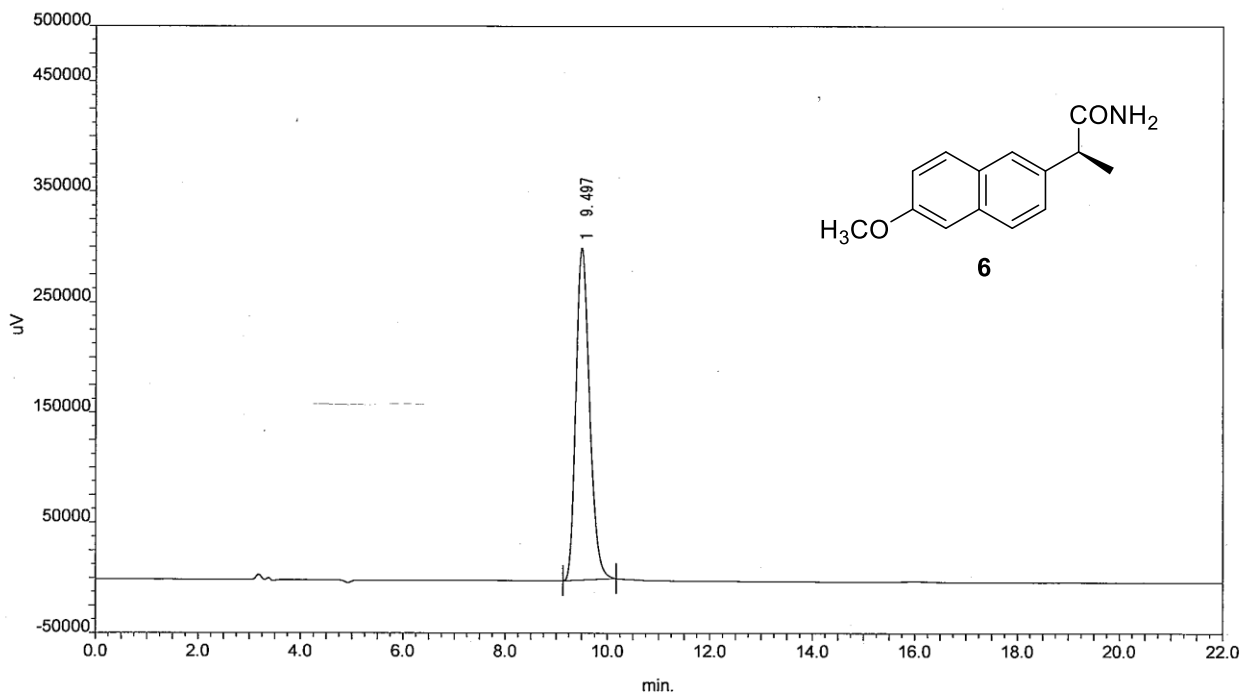

解析結果

| No. | Rt (min) | ピーク名 | 面積          | 面積 (%)   | 高さ     | NTP    | 対称性   | 分離度   |
|-----|----------|------|-------------|----------|--------|--------|-------|-------|
| 1   | 9.50     |      | 5548002.100 | 100.0000 | 300720 | 5827.0 | 1.278 | ----- |

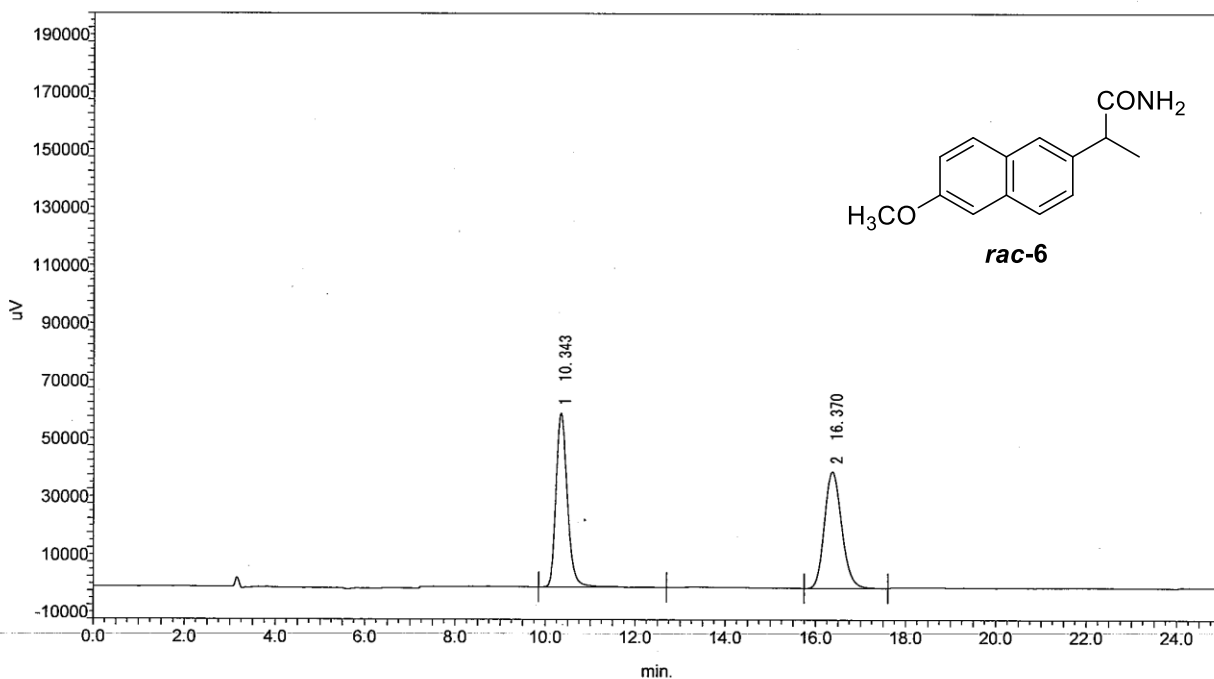

解析結果

| No. | Rt (min) | ピーク名 | 面積          | 面積 (%)  | 高さ    | NTP    | 対称性   | 分離度    |
|-----|----------|------|-------------|---------|-------|--------|-------|--------|
| 1   | 10.34    |      | 1066726.100 | 49.6836 | 59930 | 7825.4 | 1.274 | 10.166 |
| 2   | 16.37    |      | 1080312.500 | 50.3164 | 40211 | 8317.4 | 1.189 | -----  |

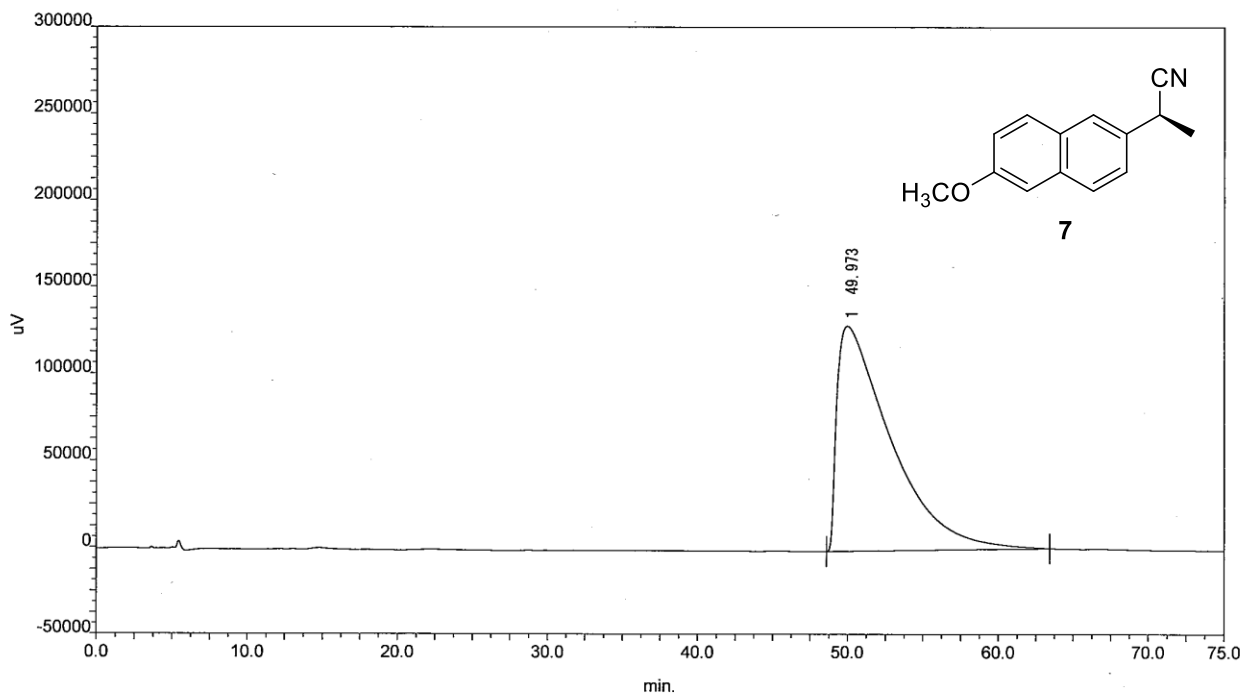

解析結果

| No. | Rt (min) | ピーク名 | 面積           | 面積 (%)   | 高さ     | NTP   | 対称性   | 分離度   |
|-----|----------|------|--------------|----------|--------|-------|-------|-------|
| 1   | 49.97    |      | 32233938.000 | 100.0000 | 129420 | 821.5 | 4.172 | ----- |
|     |          |      | 32233938.000 | 100.0000 | 129420 |       |       |       |

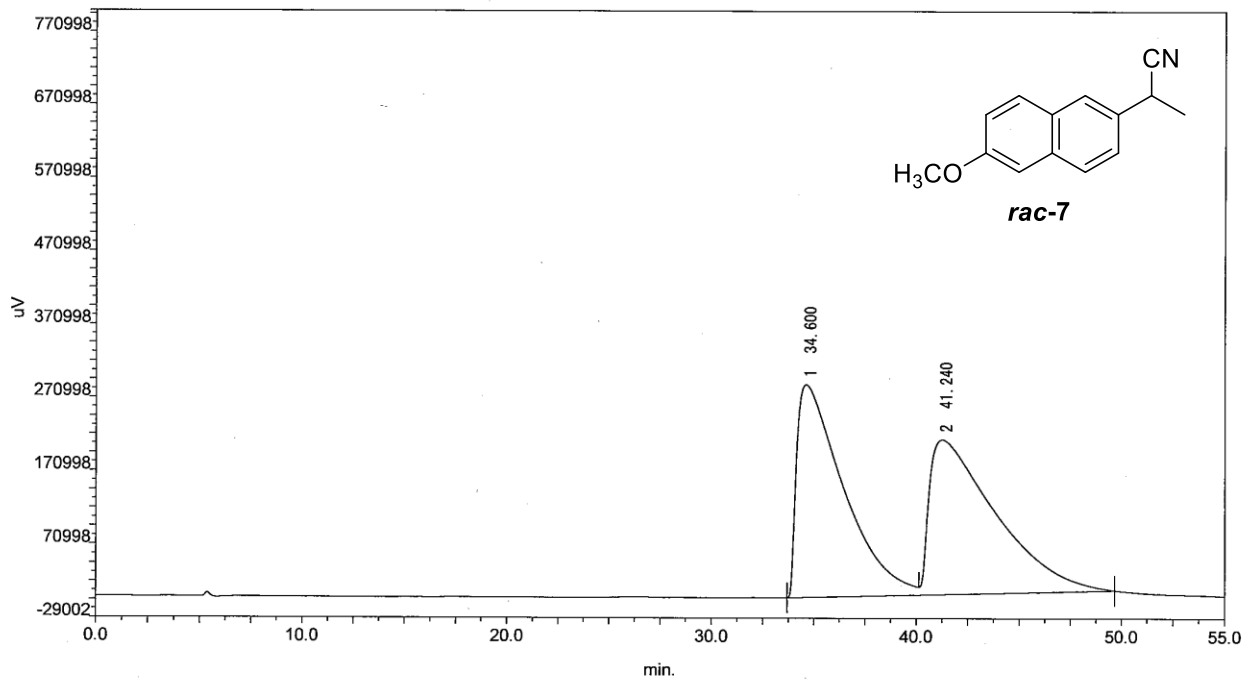

解析結果

| No. | Rt (min) | ピーク名 | 面積           | 面積 (%)   | 高さ     | NTP    | 対称性   | 分離度   |
|-----|----------|------|--------------|----------|--------|--------|-------|-------|
| 1   | 34.60    |      | 46248486.110 | 49.4895  | 289587 | 1061.7 | 3.970 | 1.298 |
| 2   | 41.24    |      | 47202542.290 | 50.5105  | 209930 | 760.9  | ----- | ----- |
|     |          |      | 93451028.400 | 100.0000 | 499517 |        |       |       |

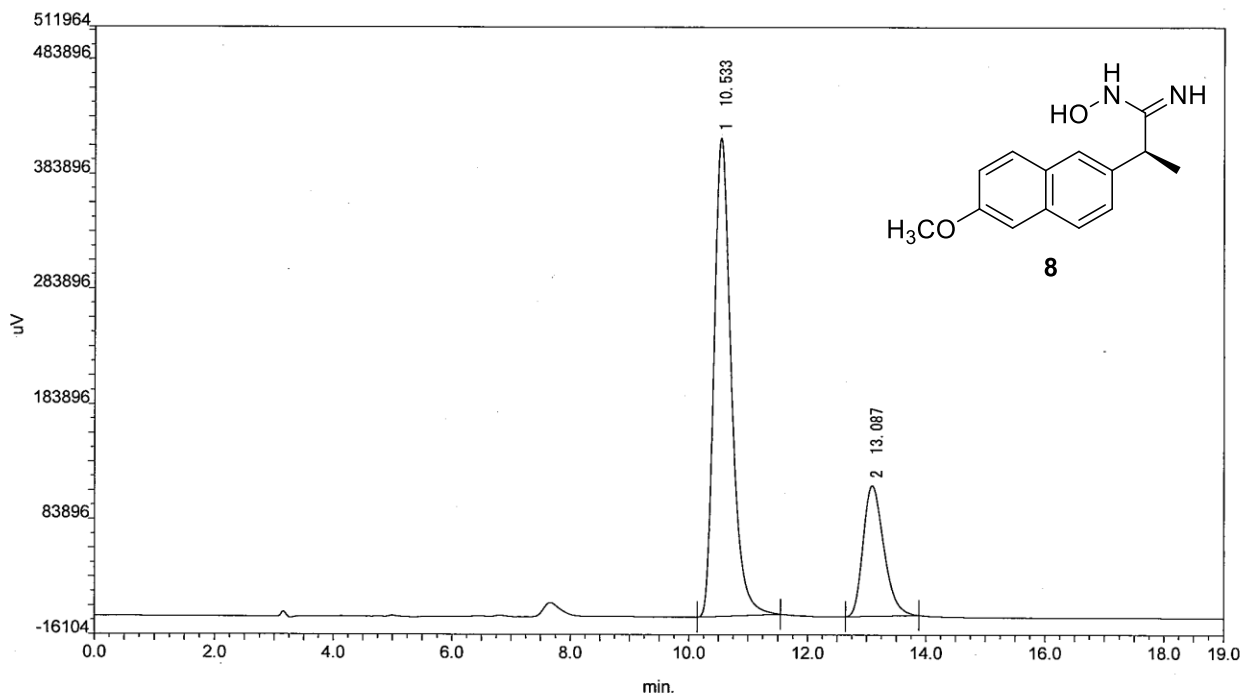

解析結果

| No. | Rt (min) | ピーク名 | 面積           | 面積 (%)   | 高さ     | NTP    | 対称性   | 分離度   |
|-----|----------|------|--------------|----------|--------|--------|-------|-------|
| 1   | 10.53    |      | 8446919.800  | 75.3784  | 415545 | 5864.6 | 1.422 | 4.229 |
| 2   | 13.09    |      | 2759095.500  | 24.6216  | 113326 | 6340.4 | 1.308 | ----- |
|     |          |      | 11206015.300 | 100.0000 | 528871 |        |       |       |

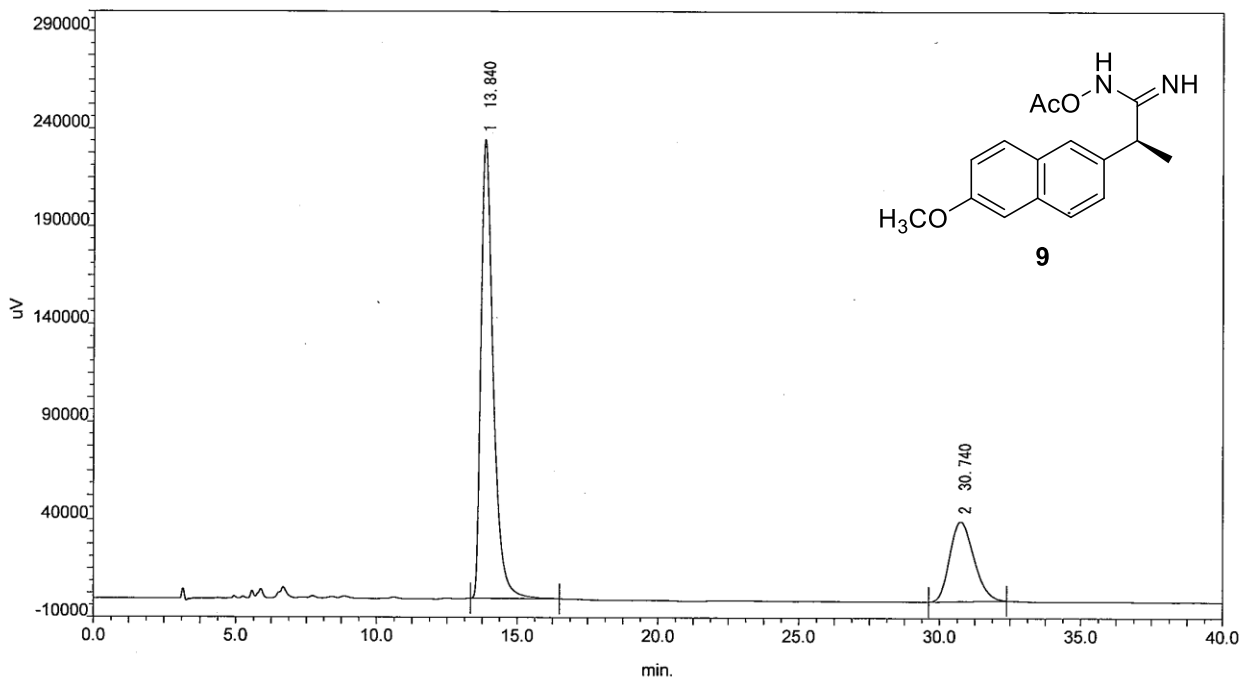

解析結果

| No. | Rt (min) | ピーク名 | 面積          | 面積 (%)   | 高さ     | NTP    | 対称性   | 分離度    |
|-----|----------|------|-------------|----------|--------|--------|-------|--------|
| 1   | 13.84    |      | 7175027.600 | 74.6401  | 234585 | 4458.9 | 1.731 | 13.879 |
| 2   | 30.74    |      | 2437800.100 | 25.3599  | 40839  | 5859.8 | 1.231 | -----  |
|     |          |      | 9612827.700 | 100.0000 | 275424 |        |       |        |



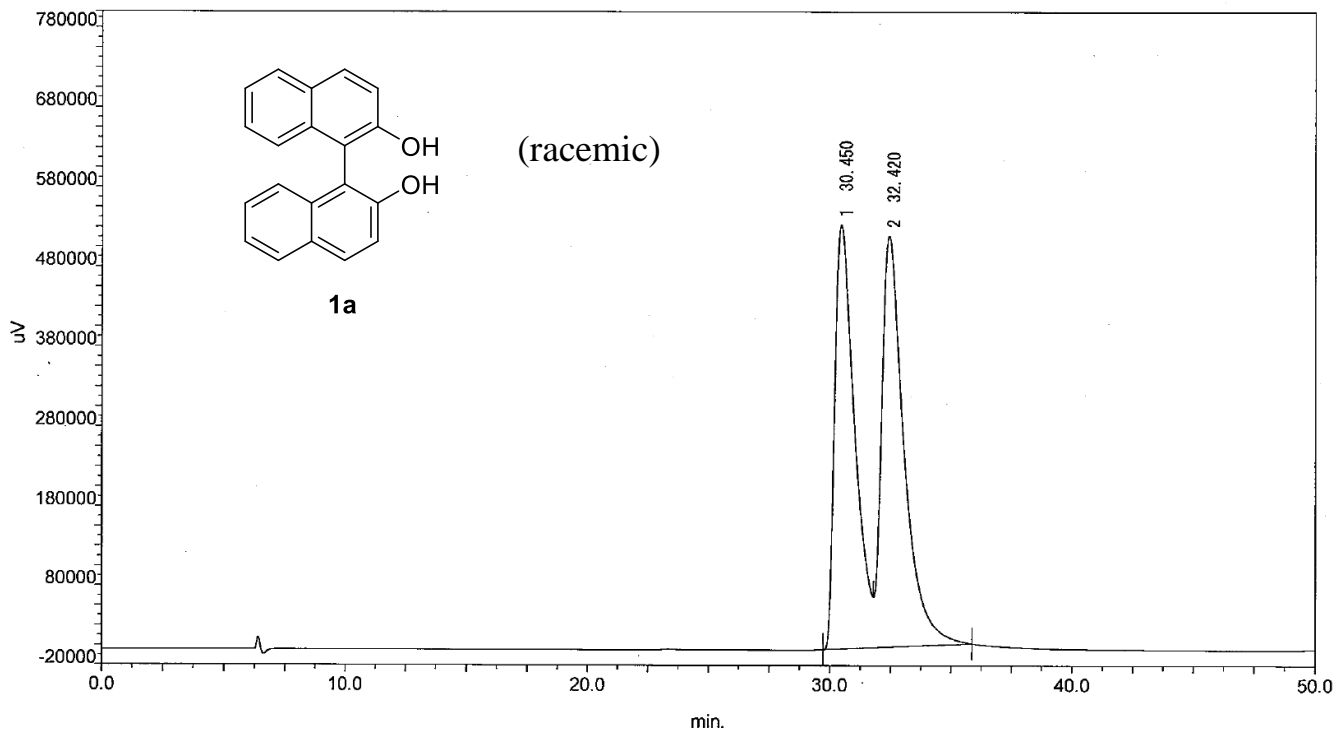

解析結果

| No. | Rt (min) | ピーク名 | 面積           | 面積 (%)   | 高さ      | NTP    | 対称性   | 分離度   |
|-----|----------|------|--------------|----------|---------|--------|-------|-------|
| 1   | 30.45    |      | 30234001.634 | 47.3348  | 531894  | 6491.1 | ----- | 1.214 |
| 2   | 32.42    |      | 33638722.366 | 52.6652  | 515685  | 5587.3 | ----- | ----- |
|     |          |      | 63872724.000 | 100.0000 | 1047579 |        |       |       |

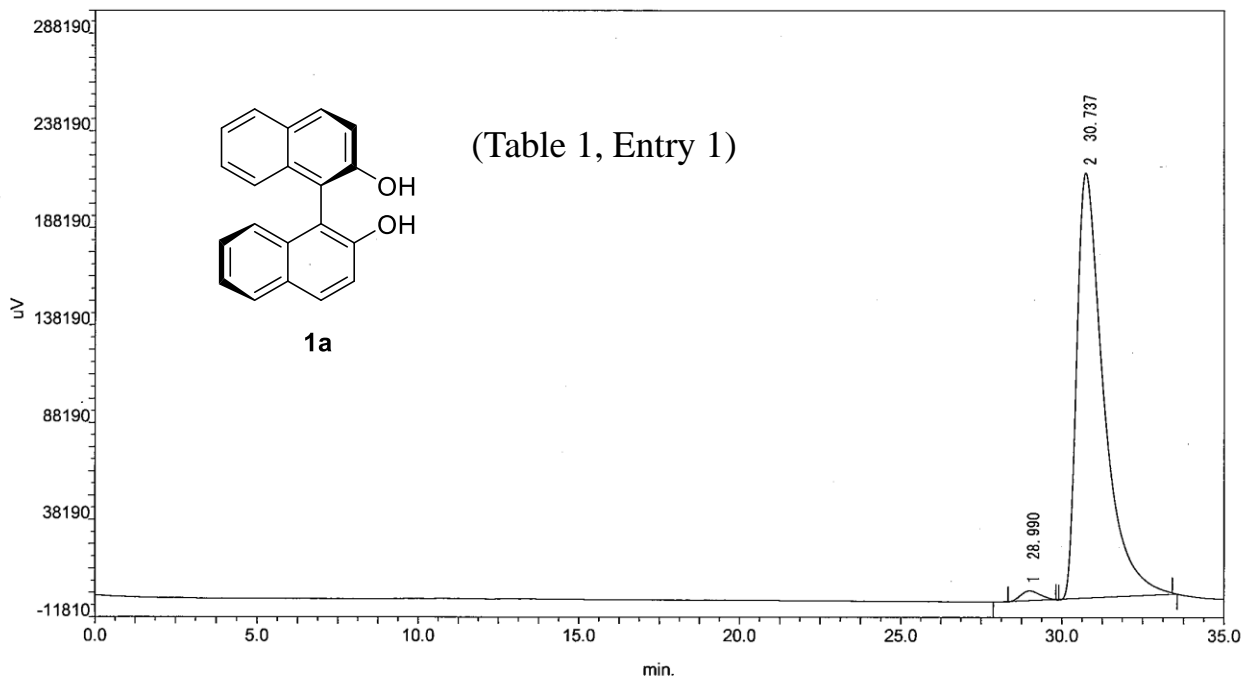

解析結果

| No. | Rt (min) | ピーク名 | 面積           | 面積 (%)   | 高さ     | NTP     | 対称性   | 分離度   |
|-----|----------|------|--------------|----------|--------|---------|-------|-------|
| 1   | 28.99    |      | 201816.556   | 1.5725   | 4997   | 11654.2 | 1.212 | 1.338 |
| 2   | 30.74    |      | 12632613.611 | 98.4275  | 218594 | 6398.6  | 2.002 | ----- |
|     |          |      | 12834430.167 | 100.0000 | 223591 |         |       |       |

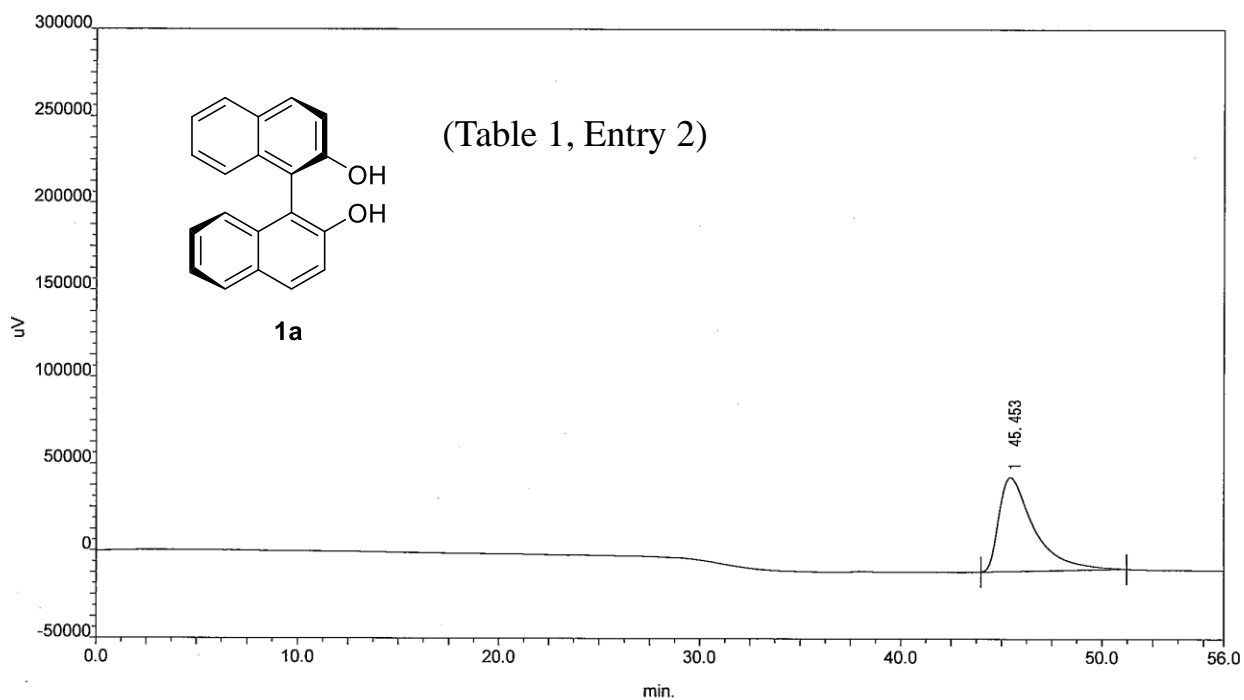

| 解析結果 |          | ピーク名 | 面積          | 面積 (%)   | 高さ    | NTP    | 対称性   | 分離度   |
|------|----------|------|-------------|----------|-------|--------|-------|-------|
| No.  | Rt (min) |      |             |          |       |        |       |       |
| 1    | 45.45    |      | 6542971.600 | 100.0000 | 53890 | 2780.0 | 2.138 | ----- |
|      |          |      | 6542971.600 | 100.0000 | 53890 |        |       |       |

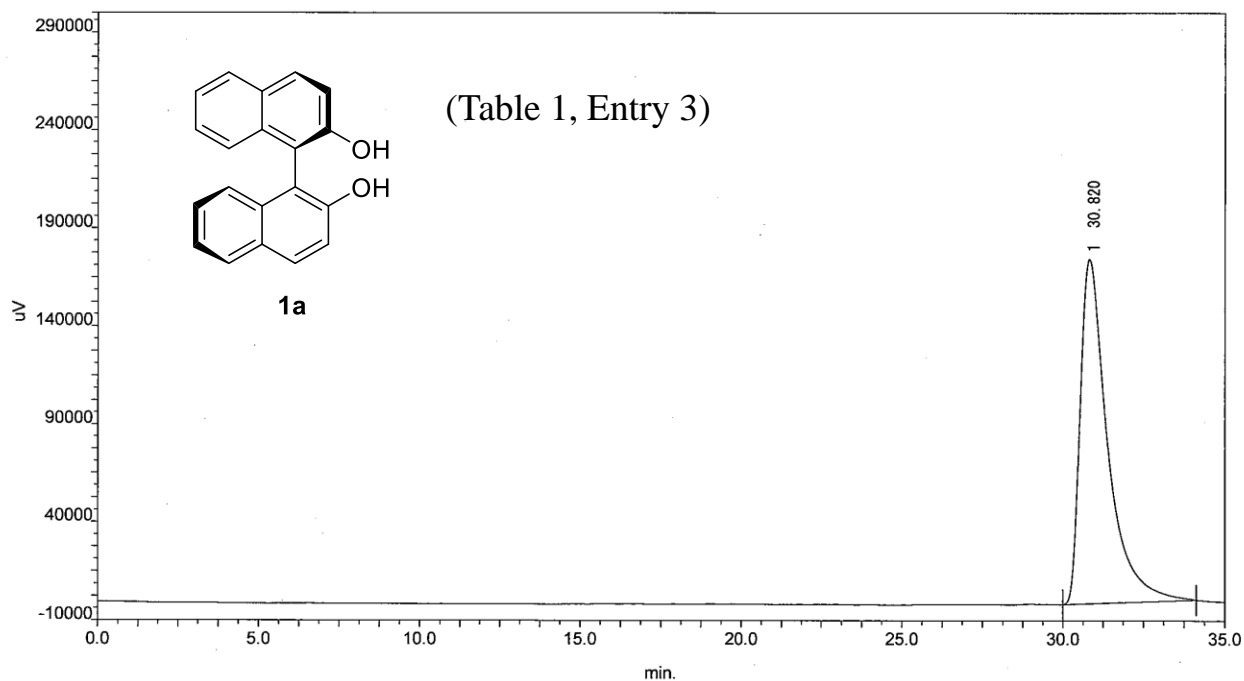

| 解析結果 |          | ピーク名 | 面積           | 面積 (%)   | 高さ     | NTP    | 対称性   | 分離度   |
|------|----------|------|--------------|----------|--------|--------|-------|-------|
| No.  | Rt (min) |      |              |          |        |        |       |       |
| 1    | 30.82    |      | 10442350.600 | 100.0000 | 175721 | 5574.5 | 2.029 | ----- |
|      |          |      | 10442350.600 | 100.0000 | 175721 |        |       |       |

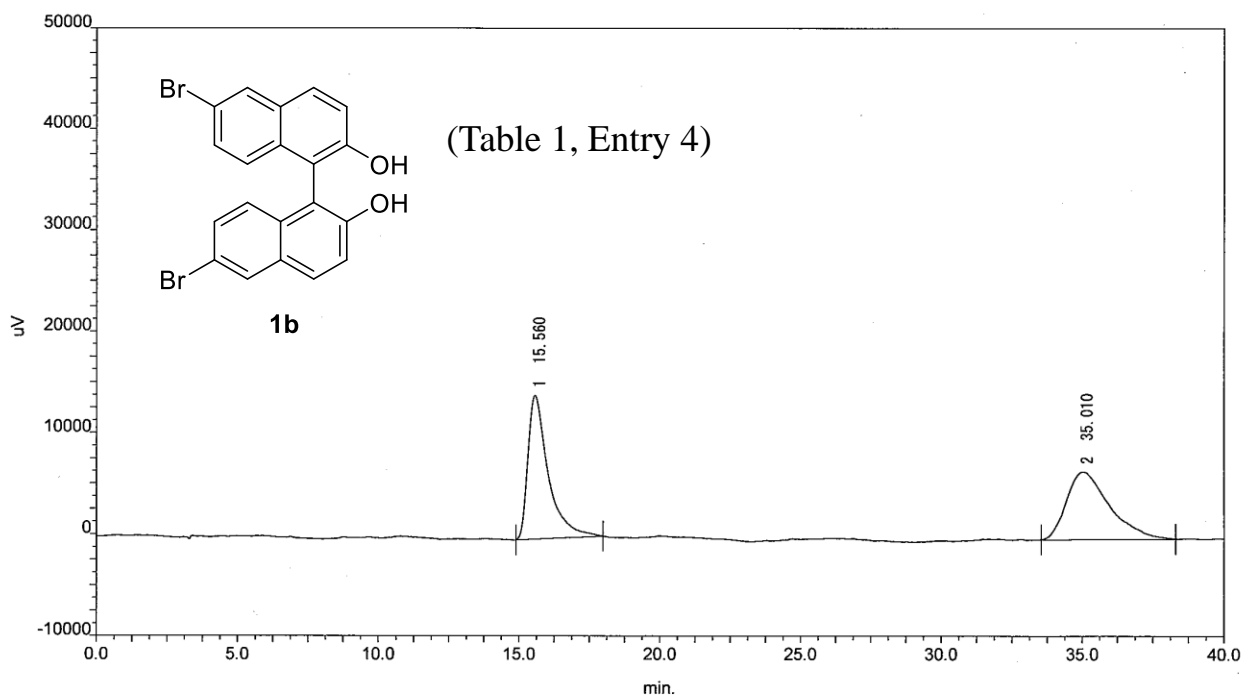

解析結果

| No. | Rt (min) | ピーク名 | 面積          | 面積 (%)   | 高さ    | NTP    | 対称性   | 分離度   |
|-----|----------|------|-------------|----------|-------|--------|-------|-------|
| 1   | 15.56    |      | 713262.600  | 49.9847  | 14169 | 1854.8 | 2.001 | 8.582 |
| 2   | 35.01    |      | 713700.000  | 50.0153  | 6686  | 2057.3 | 1.538 | ----- |
|     |          |      | 1426962.600 | 100.0000 | 20855 |        |       |       |

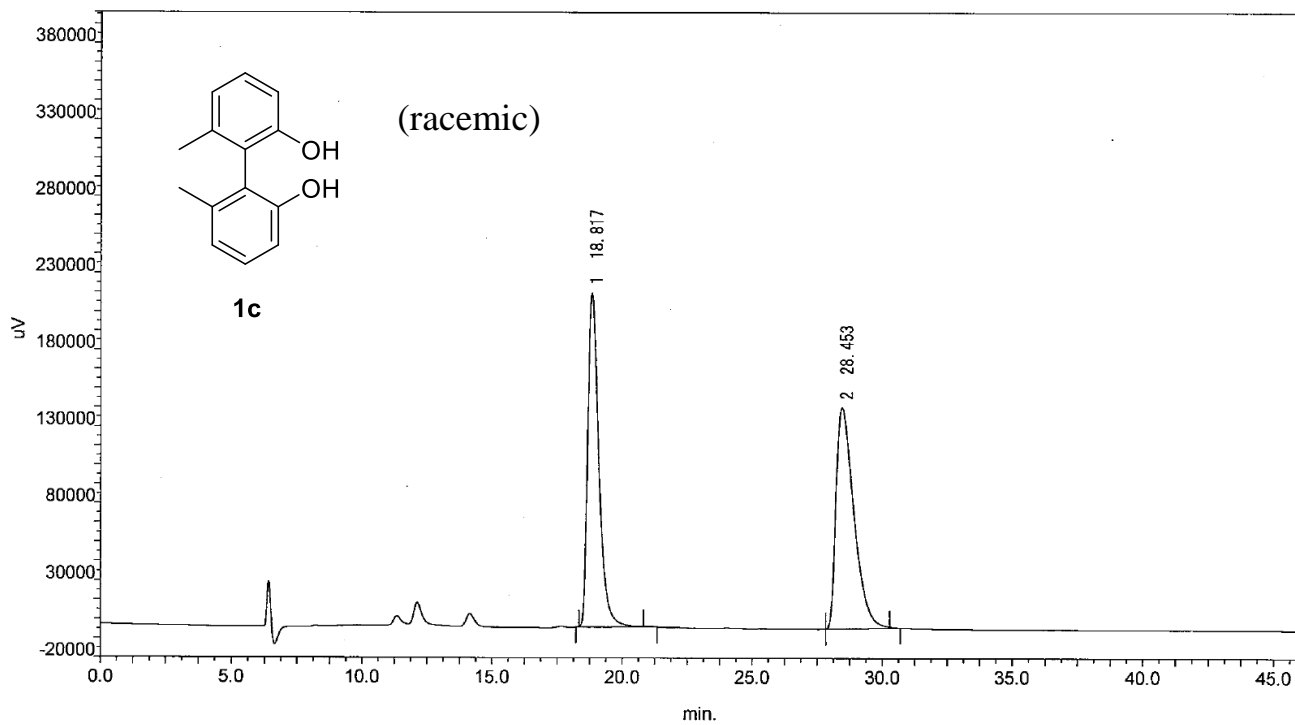

解析結果

| No. | Rt (min) | ピーク名 | 面積           | 面積 (%)   | 高さ     | NTP    | 対称性   | 分離度   |
|-----|----------|------|--------------|----------|--------|--------|-------|-------|
| 1   | 18.82    |      | 6497751.898  | 48.8439  | 217322 | 8752.9 | 1.608 | 9.240 |
| 2   | 28.45    |      | 6805350.731  | 51.1561  | 143365 | 7890.3 | 1.819 | ----- |
|     |          |      | 13303102.629 | 100.0000 | 360687 |        |       |       |

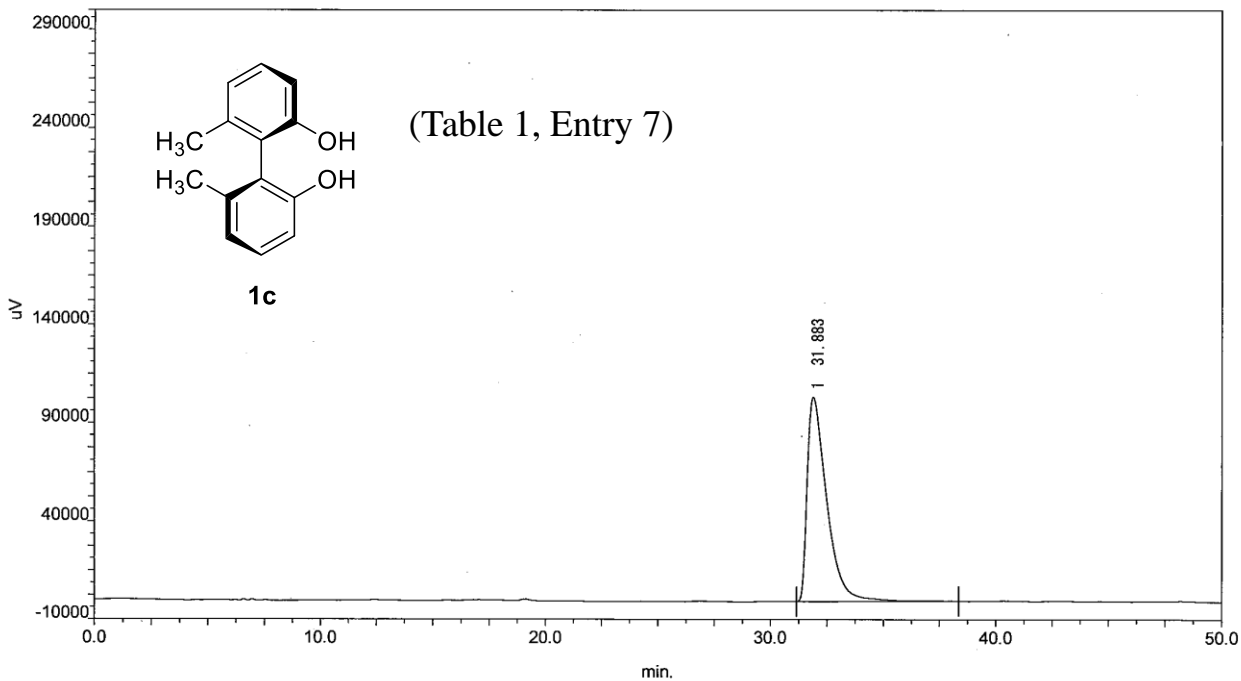

解析結果

| No. | Rt (min) | ピーク名 | 面積          | 面積 (%)   | 高さ     | NTP    | 対称性   | 分離度   |
|-----|----------|------|-------------|----------|--------|--------|-------|-------|
| 1   | 31.88    |      | 6315474.000 | 100.0000 | 104173 | 6236.8 | 2.121 | ----- |
|     |          |      | 6315474.000 | 100.0000 | 104173 |        |       |       |

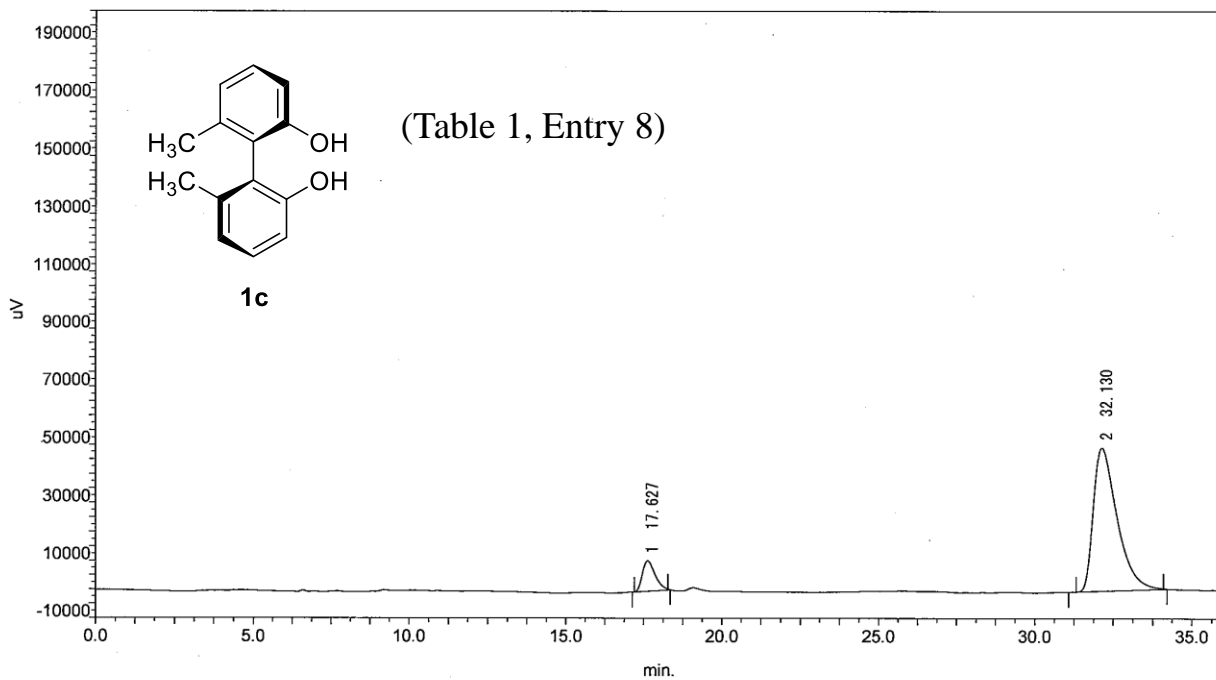

解析結果

| No. | Rt (min) | ピーク名 | 面積          | 面積 (%)   | 高さ    | NTP    | 対称性   | 分離度    |
|-----|----------|------|-------------|----------|-------|--------|-------|--------|
| 1   | 17.63    |      | 300989.840  | 10.2862  | 10625 | 8127.8 | 1.399 | 13.009 |
| 2   | 32.13    |      | 2625161.932 | 89.7138  | 49523 | 7881.2 | 1.720 | -----  |
|     |          |      | 2926151.771 | 100.0000 | 60148 |        |       |        |
